# Supplementary material for: Site-selective radical reactions of kinetically stable open-shell singlet diradicaloid difluorenoheteroles with tributyltin hydride and azo-based radical initiators
Source: Royal Society of Chemistry journal article supplement (doi:10.1039/d3sc00381g), 2023-01-01
Supplement: d3sc00381g1.pdf [file d3sc00381g1.pdf]

*Electronic supplementary information*

## **Site-selective radical reactions of kinetically stable open-shell singlet diradicaloid difluorenoheteroles with tributyltin hydride and azo-based radical initiators**

Naoki Tabata,<sup>a</sup> Takumi Uchino,<sup>a</sup> Chitoshi Kitamura,<sup>a</sup> Kazunari Yoshizawa,<sup>b</sup>  
Yoshihito Shiota,<sup>\*b</sup> and Shin-ichiro Kato <sup>\*a</sup>

<sup>a</sup> *Department of Materials Chemistry, School of Engineering, The University of Shiga Prefecture, 2500 Hassaka-cho, Hikone, Shiga 522-8533, Japan.*

*kato.s@mat.usp.ac.jp*

<sup>b</sup> *Institute for Materials Chemistry and Engineering (IMCE), Kyushu University, 744 Motoooka, Nishi-ku, Fukuoka 819-0395, Japan.*

*shiota@ms.ifoc.kyushu-u.ac.jp*

### **Table of Contents**

1. Experimental Details: Synthesis of Compounds (S2)
2. Supporting Scheme, Figures, and Tables (S9)
3. <sup>1</sup>H and <sup>13</sup>C NMR Spectral Data (S19)
4. Theoretical Calculations (S32)
5. References (S82)

## 1. Experimental Details: Synthesis of Compounds

Commercially available reagents and solvents were used as received. **DFTh** and **DFFu** were prepared according to the literature procedures.<sup>[1,2]</sup> An oil bath was used as the heat source. Column chromatography and plug filtrations were carried out with SiO<sub>2</sub>. Thin-layer chromatography (TLC) was conducted on aluminum sheets coated with SiO<sub>2</sub> 60 F<sub>254</sub>. Melting points (M.p.) were measured with a capillary tube (Stanford Research Systems OPTiMelt MPA100). Recycling gel-permeation chromatography (JAIGEL LC-918 or LaboACE LC-5060) was performed with UV detectors using 1H and 2H polystyrene columns eluted with CHCl<sub>3</sub>. <sup>1</sup>H and <sup>13</sup>C NMR spectra were recorded on a spectrometer (JEOL JNM-ECS400) at 400 MHz for <sup>1</sup>H and 100 MHz for <sup>13</sup>C. CDCl<sub>3</sub> or *p*-xylene-*d*<sub>10</sub> were used as a solvent, and residual solvent signal in the <sup>1</sup>H and <sup>13</sup>C NMR spectra was used as an internal reference. To avoid the effect of DCl on the spectral broadening of diradicaloids, Et<sub>3</sub>N was included in CDCl<sub>3</sub>. HRMS (Thermo Fisher Scientific LTQ Orbitrap XL) spectrometric analyses were conducted in a positive mode. Electronic absorption (JASCO V-670 or JV-550) spectra were measured in a cuvette of 1 cm at room temperature. Cyclic voltammetry (EC Frontier ECstat-100) was performed using a cell equipped with a platinum wire working electrode, a platinum wire counter electrode, and an Ag/AgNO<sub>3</sub> reference electrode. All electrochemical measurements were performed in CH<sub>2</sub>Cl<sub>2</sub> solution (ca. 5 × 10<sup>-4</sup> mol L<sup>-1</sup>) containing 0.1 mol L<sup>-1</sup> [(*n*-Bu)<sub>4</sub>N][PF<sub>6</sub>] at room temperature. All potentials are referenced to the ferrocenium/ferrocene (Fc<sup>+</sup>/Fc) couple, which was used as a standard.

### Preparation of DFThH

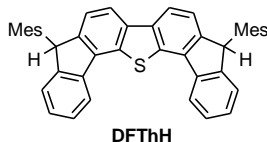

To a dry toluene solution of **DFTh** (30 mg, 52 μmol) was added tributyltin hydride (0.14 mL, 0.50 mmol, 10 equiv) at room temperature under a nitrogen atmosphere. The resulting solution was stirred at 110 °C for 6 h. After the solvent was removed under reduced pressure, the residue was purified by column chromatography (silica gel, toluene/hexane = 1:3) to give **DFThH** (29 mg, 49 μmol) in 97% yield as a white solid. The <sup>1</sup>H NMR spectral data are in agreement with those reported previously.<sup>[2]</sup>

### Preparation of DFFuH

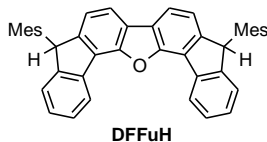

To a dry toluene solution of **DFFu** (30 mg, 52 μmol) was added tributyltin hydride (0.14 mL, 0.50 mmol, 10 equiv) at room temperature under a nitrogen atmosphere. The resulting solution was stirred at 110 °C for 6 h. After the solvent was removed under reduced pressure, the residue was purified by column chromatography (silica gel, toluene/hexane = 1:3) to give **DFFuH** (24 mg, 41 μmol) in 78% yield as a white solid. The <sup>1</sup>H NMR spectral data are in agreement with those reported previously.<sup>[1]</sup>

**General procedure for the synthesis of 1H–6H.** A mixture of **DFTh** or **DFFu** (1 equiv) and azo radical initiator (1.5–5 equiv) in was stirred dry toluene at 110 °C or in dry *p*-xylene at 120 °C for 3–20 min under a nitrogen atmosphere; the color of the mixture changed from blue to green. Tributyltin

hydride was added to the mixture; the mixture gradually became pale yellow. After the reaction solvent was removed under reduced pressure, the residue was dissolved with CH<sub>2</sub>Cl<sub>2</sub>. This solution was washed with brine, dried over anhydrous Na<sub>2</sub>SO<sub>4</sub>, and concentrated under reduced pressure. The residue was subjected to column chromatography (silica gel) to give **1H–6H**.

### Preparation of 1H

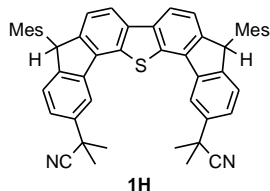

In dry toluene (20 mL), **DFTh** (50 mg, 84 μmol) was allowed to react with 2,2'-azobis(isobutyronitrile) (AIBN; 69 mg, 0.42 mmol, 5 equiv) for 20 min and then tributyltin hydride (0.23 mL, 0.84 mmol, 10 equiv) for 1 h according to the general procedure for the synthesis of **1H–6H**. The crude product was purified by column chromatography (silica gel, CH<sub>2</sub>Cl<sub>2</sub>) to give **1H** (40 mg, 55 μmol) in 65% yield as a white solid. Mp 294–296 °C. <sup>1</sup>H NMR (400 MHz, CDCl<sub>3</sub>, diastereomer mixture): δ 8.39 (2H, s), 8.17 (2H, d, *J* = 7.8 Hz), 7.49 (2H, d, *J* = 7.8 Hz), 7.40 (2H, d, *J* = 7.8 Hz), 7.35 (2H, d, *J* = 7.8 Hz), 7.07 (2H, s), 6.67 (2H, s), 5.70 (2H, s), 2.74 (6H, s), 2.30 (6H, s), 1.94 (12H, s), 1.10 (3H, s), 1.05 (3H, s) ppm. <sup>13</sup>C NMR (100 MHz, CDCl<sub>3</sub>): δ 147.40, 146.99, 146.89, 141.19, 141.36, 140.81, 138.00, 137.97, 137.86, 136.79, 135.20, 134.78, 133.16, 132.27, 132.23, 130.74, 129.15, 124.93, 124.54, 124.44, 121.03, 120.90, 118.63, 50.33, 37.79, 29.71, 29.64, 22.02, 21.03, 18.92, 18.81 (31 signals out of 52 expected). UV–vis (CH<sub>2</sub>Cl<sub>2</sub>) λ<sub>max</sub> (relative intensity): 265 (1.0), 285 (0.65), 296 (0.68), 308 (0.67), 346 (0.03) nm. HRMS (ESI, positive): *m/z* calcd for C<sub>52</sub>H<sub>46</sub>N<sub>2</sub>S 730.3376, found 730.3380 [M<sup>+</sup>].

### Preparation of 2H

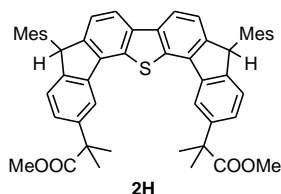

In dry toluene (20 mL), **DFTh** (50 mg, 84 μmol) was allowed to react with dimethyl 2,2'-azobis(2-methylpropionate) (V-601™; 97 mg, 0.42 mmol, 5 equiv) for 20 min and then tributyltin hydride (0.23 mL, 0.84 mmol, 10 equiv) for 1 h according to the general procedure for the synthesis of **1H–6H**. The crude product was purified by column chromatography (silica gel, CH<sub>2</sub>Cl<sub>2</sub>/hexane = 9:1) to give **2H** (35 mg, 42 μmol) in 51% yield as a white solid. Mp 238–241 °C (decomp). <sup>1</sup>H NMR (400 MHz, CDCl<sub>3</sub>, diastereomer mixture): δ 8.29 (2H, s), 8.14 (2H, d, *J* = 8.0 Hz), 7.39 (2H, d, *J* = 8.0 Hz), 7.34 (2H, d, *J* = 8.0 Hz), 7.28 (2H, dd, *J* = 8.0 & 2.8 Hz), 7.06 (2H, s), 6.66 (2H, s), 5.68 (2H, s), 3.75 (6H, s), 2.73 (6H, s), 2.30 (6H, s), 1.84 (6H, s), 1.82 (6H, s), 1.11 (3H, s), 1.07 (3H, s) ppm. <sup>13</sup>C NMR (100 MHz, CDCl<sub>3</sub>): δ 177.51, 146.83, 146.73, 146.26, 144.20, 140.43, 138.08, 137.86, 136.61, 135.29, 135.26, 135.19, 133.53, 133.50, 132.15, 130.69, 129.09, 125.26, 124.05, 120.98, 120.52, 119.15, 52.52, 50.31, 46.83, 31.11, 26.92, 26.84, 26.75, 21.98, 21.03, 19.00, 18.89 (33 signals out of 52 expected) ppm. UV–vis (CH<sub>2</sub>Cl<sub>2</sub>) λ<sub>max</sub> (relative intensity): 266 (1.0), 291 (0.96) nm. HRMS (ESI, positive): *m/z* calcd for C<sub>54</sub>H<sub>52</sub>O<sub>4</sub>S 796.3580, found 796.3576 [M<sup>+</sup>].

### Preparation of 3H

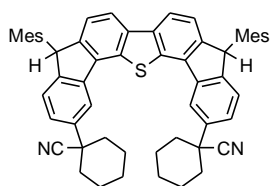

3H

In dry *p*-xylene (8 mL), **DFTh** (50 mg, 84  $\mu$ mol) was allowed to react with 1,1'-azobis(cyclohexane-1-carbonitrile) (V-40<sup>TM</sup>; 62 mg, 0.25 mmol, 3.0 equiv) for 10 min and then tributyltin hydride (0.23 mL, 0.84 mmol, 10 equiv) for 1 h according to the general procedure for the synthesis of **1H–6H**. The crude product was purified by column chromatography (silica gel, toluene) to give **3H** (60 mg, 74  $\mu$ mol) in 94% yield as a white solid. Mp 258–261 °C (decomp). <sup>1</sup>H NMR (400 MHz, CDCl<sub>3</sub>, diastereomer mixture):  $\delta$  8.39 (2H, s), 8.16 (2H, dd,  $J$  = 8.0 Hz & 1.3 Hz), 7.53 (2H, td,  $J$  = 8.0 Hz & 1.7 Hz), 7.40 (2H, d,  $J$  = 8.0 Hz), 7.35 (2H, dd,  $J$  = 8.0 Hz & 3.4 Hz), 7.07 (2H, s), 6.67 (2H, s), 5.70 (2H, s), 2.74 (6H, s), 2.35–2.38 (4H, m), 2.30 (6H, s), 2.04–1.94 (16H, m), 1.09 (3H, s), 1.05 (3H, s) ppm. <sup>13</sup>C NMR (100 MHz, CDCl<sub>3</sub>):  $\delta$  147.46, 147.42, 147.03, 146.90, 141.23, 140.82, 138.01, 137.88, 136.77, 135.25, 134.92, 133.24, 132.24, 132.21, 130.75, 129.15, 125.13, 124.50, 123.11, 121.04, 120.84, 119.13, 50.33, 44.90, 37.90, 37.82, 25.17, 23.98, 22.00, 21.04, 18.91, 18.82 (32 signals out of 54 expected) ppm. UV–vis (CH<sub>2</sub>Cl<sub>2</sub>)  $\lambda_{\text{max}}$  (relative intensity): 265 (1.0), 295 (0.64), 308 (0.64) nm. HRMS (ESI, positive):  $m/z$  calcd for C<sub>58</sub>H<sub>54</sub>N<sub>2</sub>S 810.4002, found 810.4013 [M<sup>+</sup>].

### Preparation of 4H

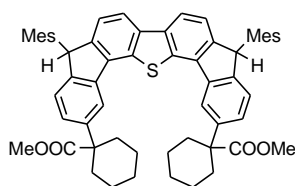

4H

In dry *p*-xylene (10 mL), **DFTh** (50 mg, 84  $\mu$ mol) was allowed to react with dimethyl 1,1'-azobis(1-cyclohexanecarboxylate) (VE-073<sup>TM</sup>; 78 mg, 0.25 mmol, 3.0 equiv) for 10 min and then tributyltin hydride (0.23 mL, 0.84 mmol, 10 equiv) for 1 h according to the general procedure for the synthesis of **1H–6H**. The crude product was purified by column chromatography (silica gel, toluene) to give **4H** (50 mg, 58  $\mu$ mol) in 68% yield as a white solid. Mp 214–217 °C (decomp). <sup>1</sup>H NMR (400 MHz, CDCl<sub>3</sub>, diastereomer mixture):  $\delta$  8.37 (2H, s), 8.13 (2H, dd,  $J$  = 8.0 Hz & 1.6 Hz), 7.40 (2H, d,  $J$  = 9.0 Hz), 7.38 (2H, d,  $J$  = 8.0 Hz), 7.27 (2H, d,  $J$  = 8.0 Hz), 7.06 (2H, s), 6.66 (1H, s), 6.65 (1H, s), 5.68 (1H, s), 5.67 (1H, s), 3.74 (6H, s), 2.80–2.73 (4H, m), 2.73 (6H, s), 2.29 (6H, s), 2.03–2.00 (4H, m), 1.93–1.80 (4H, m), 1.78–1.70 (2H, m), 1.64–1.61 (4H, m), 1.43–1.40 (2H, m), 1.10 (3H, s), 1.05 (3H, s) ppm; <sup>13</sup>C NMR (100 MHz, CDCl<sub>3</sub>):  $\delta$  175.94, 146.79, 146.68, 146.36, 146.31, 143.36, 140.49, 138.10, 137.85, 136.59, 135.38, 135.20, 133.59, 132.17, 130.68, 129.08, 125.35, 124.08, 120.96, 120.47, 119.72, 52.31, 51.17, 50.27, 35.26, 35.16, 35.11, 25.87, 24.06, 21.98, 21.03, 18.98, 18.87 (33 signals out of 56 expected) ppm. UV–vis (CH<sub>2</sub>Cl<sub>2</sub>)  $\lambda_{\text{max}}$  (relative intensity): 266 (1.0), 308 (0.57), 392 (0.17) nm. HRMS (ESI, positive):  $m/z$  calcd for C<sub>60</sub>H<sub>60</sub>O<sub>4</sub>S 876.4206, found 876.4216 [M<sup>+</sup>].

### Preparation of 5H

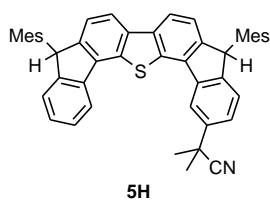

In dry toluene (20 mL), **DFTh** (50 mg, 84  $\mu\text{mol}$ ) was allowed to react with 2,2'-azobis(isobutyronitrile) (AIBN; 21 mg, 0.13 mmol, 1.5 equiv) for 3 min and then tributyltin hydride (0.12 mL, 0.42 mmol, 5.0 equiv) for 1 h according to the general procedure for the synthesis of **1H–6H**. The crude product was purified by column chromatography (silica gel, toluene/hexane = 1:3  $\rightarrow$  pure toluene) to give **5H** (26 mg, 42  $\mu\text{mol}$ ) in 47% yield as a white solid. Mp 212–215  $^{\circ}\text{C}$ .  $^1\text{H}$  NMR (400 MHz,  $\text{CDCl}_3$ ):  $\delta$  8.30 (1H, s), 8.26 (1H, d,  $J = 7.6$  Hz), 8.16 (1H, dd,  $J = 7.6$  & 1.4 Hz), 8.15 (1H, dd,  $J = 7.6$  & 2.0 Hz), 7.65 (1H, t,  $J = 7.6$  Hz), 7.51 (1H, d,  $J = 7.4$  Hz), 7.41–7.33 (5H, m), 7.07 (2H, s), 6.67 (2H, s), 5.71 (1H, s), 5.69 (1H, s), 2.75 (3H, s), 2.74 (3H, s), 2.30 (6H, s), 1.99 (3H, s), 1.98 (3H, s), 1.10 (3H, 2s), 1.08 (3H, s) ppm.  $^{13}\text{C}$  NMR (100 MHz,  $\text{CDCl}_3$ ):  $\delta$  148.23, 147.85, 147.37, 147.30, 146.96, 141.37, 141.26, 140.46, 138.42, 138.33, 138.21, 137.11, 136.94, 135.70, 135.45, 135.01, 133.98, 133.52, 132.73, 132.50, 131.07, 131.03, 129.47, 129.39, 129.21, 127.80, 127.74, 127.62, 125.31, 124.84, 124.77, 124.54, 122.69, 121.36, 121.24, 120.80, 118.91, 50.87, 50.81, 37.86, 30.10, 30.04, 22.32, 21.36, 19.31, 19.23, 19.15, 19.08 (48 signals out of 48 expected). UV–vis ( $\text{CH}_2\text{Cl}_2$ )  $\lambda_{\text{max}}$  (relative intensity): 266 (1.0), 294 (0.84), 306 (0.80), 346 (0.04) nm. HRMS (ESI, positive):  $m/z$  calcd for  $\text{C}_{48}\text{H}_{41}\text{NS}$  663.2954, found 663.2948 [ $\text{M}^+$ ].

### Preparation of 6H

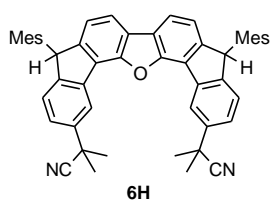

In dry toluene (20 mL), **DFFu** (60 mg, 104  $\mu\text{mol}$ ) was allowed to react with 2,2'-azobis(isobutyronitrile) (AIBN; 51 mg, 0.31 mmol, 3 equiv) for 20 min and then tributyltin hydride (0.28 mL, 1.04 mmol, 10 equiv) for 1 h according to the general procedure for the synthesis of **1H–6H**. The crude product was purified by column chromatography (silica gel,  $\text{CH}_2\text{Cl}_2$ ) to give **6H** (55 mg, 78  $\mu\text{mol}$ ) in 75% yield as a white solid. M.p. 250–252  $^{\circ}\text{C}$ ;  $^1\text{H}$  NMR (400 MHz,  $\text{CDCl}_3$ , diastereomer mixture):  $\delta$  8.55 (2H, d,  $J = 1.9$  Hz), 7.90 (2H, dd,  $J = 7.9$  & 1.9 Hz), 7.52 (2H, d,  $J = 7.9$  & 1.9 Hz), 7.32 (2H, d,  $J = 7.9$  Hz), 7.26 (2H, d,  $J = 6.2$  Hz), 7.07 (2H, s), 6.68 (2H, s), 5.70 (2H, s), 2.74 (6H, s), 2.30 (6H, s), 2.01 (6H, s), 1.99 (6H, d,  $J = 1.9$  Hz), 1.12 (3H, s), 1.10 (3H, s) ppm;  $^{13}\text{C}$  NMR (100 MHz,  $\text{CDCl}_3$ ):  $\delta$  151.50, 147.96, 147.22, 140.79, 139.61, 137.99, 137.85, 136.79, 133.48, 130.77, 129.15, 125.20, 124.87, 124.38, 124.02, 120.02, 119.65, 119.32, 50.40, 37.30, 31.75, 29.73, 29.67, 29.63, 29.57, 22.81, 21.98, 21.78, 21.04, 18.97, 18.96, 18.92, 18.91, 14.29 (34 signals out of 52 expected); UV–vis ( $\text{CH}_2\text{Cl}_2$ )  $\lambda_{\text{max}}$  (relative intensity): 296 (0.99), 303 (1.0), 321 (0.64) nm; HRMS (ESI, positive):  $m/z$  calcd for  $\text{C}_{52}\text{H}_{46}\text{N}_2\text{O}$  715.3682, found 715.3681 [ $\text{M}^+$ ].

**General procedure for the synthesis of 1–6.** To a dry toluene solution of dihydro compounds **1H–6H** (1 equiv) was added DDQ (1.5–2 equiv), and the resulting mixture was stirred at 80  $^{\circ}\text{C}$  for 12 h under a nitrogen atmosphere; the color of the mixture became deep blue. The mixture was diluted with toluene and passed through a bed of silica gel. The filtrate was concentrated under removed pressure

to give **1–6**. An analytical sample was obtained by recycling gel-permeation chromatography.

### Preparation of **1**

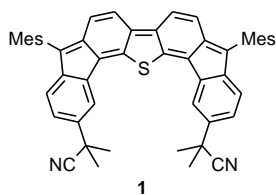

Dihydro compound **1H** (30 mg, 41  $\mu\text{mol}$ ) was allowed to react with DDQ (19 mg, 82  $\mu\text{mol}$ , 2 equiv) in dry toluene (10 mL) according to the general procedure for the synthesis of **1–6** to give **1** (30 mg, 42  $\mu\text{mol}$ ) in almost quantitatively as a deep blue solid. Mp 197–199  $^{\circ}\text{C}$  (decomp).  $^1\text{H}$  NMR (400 MHz,  $\text{CDCl}_3$ ):  $\delta$  7.88 (2H, d,  $J = 1.5$  Hz), 7.24 (2H, dd,  $J = 1.5$  & 9.1 Hz), 7.20 (2H, d,  $J = 9.1$  Hz), 7.01 (4H, s), 6.94 (2H, d,  $J = 7.9$  Hz), 6.80 (2H, d,  $J = 9.1$  Hz), 2.38 (6H, s), 2.14 (12H, s), 1.87 (12H, s) ppm.  $^{13}\text{C}$  NMR (100 MHz,  $\text{CDCl}_3$ ):  $\delta$  143.01, 141.84, 140.36, 138.10, 137.98, 137.27, 136.46, 135.70, 132.94, 130.11, 128.50, 124.78, 123.11, 119.84, 118.98, 37.72, 29.86, 29.32, 21.35, 20.58 (20 signals out of 22 expected) ppm. UV–vis ( $\text{CH}_2\text{Cl}_2$ )  $\lambda_{\text{max}}^{\text{abs}}$  ( $\epsilon$ ): 280 (58200), 613 (69100), 835 (3900) nm. HRMS (ESI, positive):  $m/z$  calcd for  $\text{C}_{52}\text{H}_{44}\text{N}_2\text{S}$  726.3219, found 728.3216 [ $\text{M}^+$ ].

### Preparation of **2**

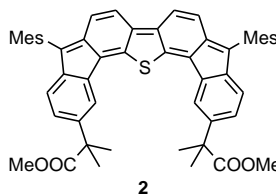

Dihydro compound **2H** (25 mg, 31  $\mu\text{mol}$ ) was allowed to react with DDQ (14 mg, 63  $\mu\text{mol}$ , 2 equiv) in dry toluene (10 mL) according to the general procedure for the synthesis of **1–6** to give **2** (18 mg, 23  $\mu\text{mol}$ ) in 73% yield as a deep blue solid. Mp 247–250  $^{\circ}\text{C}$  (decomp).  $^1\text{H}$  NMR (400 MHz,  $\text{CDCl}_3$ ):  $\delta$  7.72 (2H, s), 7.16 (2H, d,  $J = 9.1$  Hz), 7.08 (2H, d,  $J = 6.6$  Hz), 7.00 (4H, s), 6.88 (2H, d,  $J = 8.0$  Hz), 6.76 (2H, d,  $J = 9.1$  Hz), 3.78 (6H, s), 2.37 (6H, s), 2.13 (12H, s), 1.72 (12H, s) ppm.  $^{13}\text{C}$  NMR (100 MHz,  $\text{CD}_2\text{Cl}_2$ ):  $\delta$  177.22, 144.38, 143.21, 141.16, 138.14, 137.87, 137.38, 136.37, 135.80, 133.39, 130.43, 129.34, 128.63, 125.60, 124.80, 122.91, 120.90, 118.95, 52.60, 47.21, 26.74, 21.28, 20.48 (23 signals out of 23 expected) ppm. UV–vis ( $\text{CH}_2\text{Cl}_2$ )  $\lambda_{\text{max}}^{\text{abs}}$  ( $\epsilon$ ): 280 (48000), 613 (68000), 852 (3500) nm. HRMS (ESI, positive):  $m/z$  calcd for  $\text{C}_{54}\text{H}_{50}\text{O}_4\text{S}$  794.3424, found 794.3420 [ $\text{M}^+$ ].

### Preparation of **3**

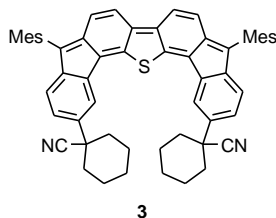

Dihydro compound **3H** (30 mg, 37  $\mu\text{mol}$ ) was allowed to react with DDQ (13 mg, 56  $\mu\text{mol}$ , 1.5 equiv) in dry toluene (10 mL) according to the general procedure for the synthesis of **1–6** to give **3** (31 mg, 38  $\mu\text{mol}$ ) in almost quantitatively as a deep blue solid. Mp 192  $^{\circ}\text{C}$  (decomp).  $^1\text{H}$  NMR (400 MHz,  $\text{CDCl}_3$ ):  $\delta$  7.88 (2H, s), 7.28 (2H, d,  $J = 8.4$  Hz), 7.19 (2H, d,  $J = 9.1$  Hz), 7.01 (4H, s), 6.95 (2H, d), 6.79 (2H, d,  $J = 8.8$  Hz), 2.38 (6H, s), 2.29 (4H, d,  $J = 6.5$  Hz), 2.14 (12H, s), 1.98–1.92 (14H, m), 1.46–1.38 (2H, m) ppm.  $^{13}\text{C}$  NMR (100 MHz,  $\text{CDCl}_3$ ):  $\delta$  142.97, 141.86, 140.43, 138.09, 137.94, 137.28, 136.43, 135.66, 133.00, 130.15, 128.48, 125.42, 124.75, 123.08, 122.79, 120.27, 118.92, 44.88, 37.56, 29.86, 25.14, 23.86, 21.35, 20.60 (24 signals out of 24 expected) ppm.

UV-vis (CH<sub>2</sub>Cl<sub>2</sub>)  $\lambda_{\max}^{\text{abs}}$  ( $\epsilon$ ): 280 (48300), 614 (45400), 864 (2100) nm. HRMS (ESI, positive):  $m/z$  calcd for C<sub>58</sub>H<sub>52</sub>N<sub>2</sub>S 808.3845, found 808.3855 [M<sup>+</sup>].

### Preparation of 4

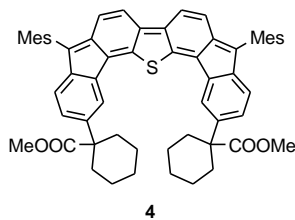

Dihydro compound **4H** (30 mg, 34  $\mu\text{mol}$ ) was allowed to react with DDQ (16 mg, 68  $\mu\text{mol}$ , 2 equiv) in dry toluene (10 mL) according to the general procedure for the synthesis of **1–6** to give **4** (28 mg, 32  $\mu\text{mol}$ ) in 93% yield as a deep blue solid. Mp 237–240 °C (decomp). <sup>1</sup>H NMR (400 MHz, CDCl<sub>3</sub>):  $\delta$  7.82 (2H, s), 7.16 (2H, d,  $J$  = 9.0 Hz), 7.14 (2H, d, 7.8 Hz), 7.00 (4H, s), 6.88 (2H, d,  $J$  = 7.8 Hz), 6.76 (2H, d,  $J$  = 9.0 Hz), 3.78 (6H, s), 2.68–2.65 (4H, m), 2.37 (6H, s), 2.13 (12H, s), 1.97–1.82 (8H, m), 1.76–1.68 (4H, m), 1.38–1.36 (4H, m) ppm. <sup>13</sup>C NMR (100 MHz, CDCl<sub>3</sub>):  $\delta$  175.65, 143.14, 142.84, 141.01, 137.90, 137.74, 137.67, 137.32, 136.27, 135.50, 133.27, 130.44, 128.40, 125.44, 124.55, 122.84, 120.89, 118.61, 51.48, 35.07, 29.85, 25.76, 24.05, 21.34, 20.62 (25 signals out of 25 expected) ppm. UV-vis (CH<sub>2</sub>Cl<sub>2</sub>)  $\lambda_{\max}^{\text{abs}}$  ( $\epsilon$ ): 280 (36400), 616 (36800), 868 (1900) nm. HRMS (ESI, positive):  $m/z$  calcd for C<sub>60</sub>H<sub>58</sub>O<sub>4</sub>S 874.4050, found 874.4064 [M<sup>+</sup>].

### Preparation of 5

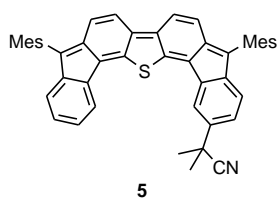

Dihydro compound **5H** (30 mg, 45  $\mu\text{mol}$ ) was allowed to react with DDQ (21 mg, 91  $\mu\text{mol}$ , 2 equiv) in dry toluene (10 mL) according to the general procedure for the synthesis of **1–6** to give **5** (29 mg, 43  $\mu\text{mol}$ ) in 97% yield as a deep blue solid. Mp 198–200 °C (decomp). <sup>1</sup>H NMR (400 MHz, CDCl<sub>3</sub>):  $\delta$  7.81 (1H, s), 7.77 (1H, d,  $J$  = 7.4 Hz), 7.30–7.26 (2H, m), 7.20 (1H, d,  $J$  = 7.4 Hz), 7.18 (1H, d,  $J$  = 7.4 Hz), 7.13 (1H, t,  $J$  = 7.4 Hz), 7.01 (4H, s), 6.94 (1H, d,  $J$  = 6.8 Hz), 6.92 (1H, d,  $J$  = 6.8 Hz), 6.78 (2H, d,  $J$  = 8.9 Hz), 2.38 (6H, s), 2.14 (6H, s), 2.12 (6H, s), 1.90 (6H, s) ppm. <sup>13</sup>C NMR (100 MHz, CDCl<sub>3</sub>):  $\delta$  143.93, 142.44, 142.10, 141.92, 139.88, 138.43, 138.28, 138.00, 137.90, 137.83, 137.65, 137.30, 136.49, 135.97, 135.84, 135.34, 133.67, 132.54, 130.30, 130.16, 129.18, 128.46, 128.43, 128.37, 127.87, 127.26, 125.44, 124.84, 124.76, 124.56, 123.48, 122.99, 122.85, 119.87, 118.94, 118.73, 37.50, 29.85, 29.45, 21.34, 20.56 (41 signals out of 48 expected) ppm. UV-vis (CH<sub>2</sub>Cl<sub>2</sub>)  $\lambda_{\max}^{\text{abs}}$  ( $\epsilon$ ): 279 (55000), 610 (80700), 845 (3800) nm. HRMS (ESI, positive):  $m/z$  calcd for C<sub>48</sub>H<sub>39</sub>NS 661.2797, found 661.2801 [M<sup>+</sup>].

### Preparation of 6

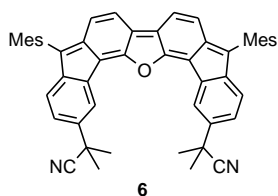

Dihydro compound **6H** (21 mg, 29.4  $\mu\text{mol}$ ) was allowed to react with DDQ (10 mg, 45.0  $\mu\text{mol}$ , 1.5 equiv) in dry toluene (10 mL) according to the general procedure for the synthesis of **1–6** to give **6** (21 mg, 29  $\mu\text{mol}$ ) in 97% yield as a deep blue solid. M.p. 266–268 °C (decomp.); <sup>1</sup>H NMR (400 MHz, CDCl<sub>3</sub>):  $\delta$  8.08 (2H, d,  $J$  = 1.8 Hz), 7.28 (2H, dd,  $J$  = 1.8 & 8.0 Hz), 7.01 (4H, s), 6.97 (2H, d,  $J$  = 8.9 Hz), 6.95 (2H, d,  $J$  = 8.9 Hz), 6.76 (2H, d,  $J$  = 8.8 Hz), 2.38 (6H, s), 2.12 (12H, s), 1.89

(12H, s) ppm;  $^{13}\text{C}$  NMR (100 MHz,  $\text{CDCl}_3$ ):  $\delta$  155.03, 143.69, 141.48, 140.25, 137.92, 137.30, 134.79, 130.29, 129.11, 128.46, 125.29, 124.92, 124.47, 122.91, 120.91, 118.41, 116.89, 37.37, 29.86, 29.26, 21.34, 20.51 (22 signals out of 22 expected) ppm; UV-vis ( $\text{CH}_2\text{Cl}_2$ )  $\lambda_{\text{max}}^{\text{abs}}$  ( $\epsilon$ ): 271 (59100), 602 (47500), 827 (3100) nm; HRMS (ESI, positive):  $m/z$  calcd for  $\text{C}_{52}\text{H}_{44}\text{N}_2\text{O}$  712.3448, found 712.3447 [ $\text{M}^+$ ].



## 2. Supporting Scheme, Figures, and Tables

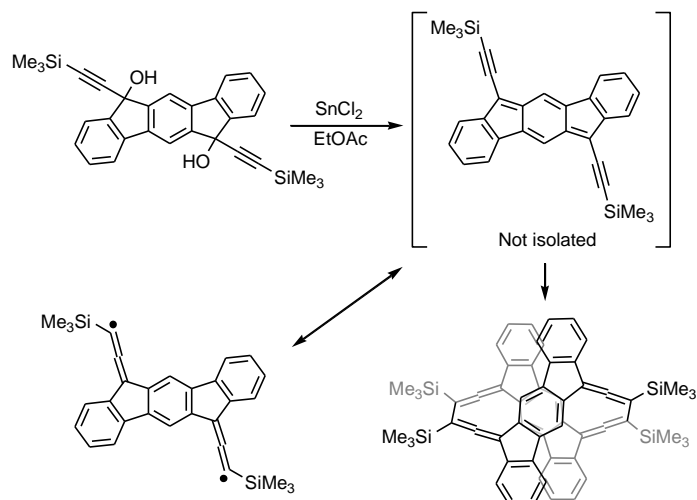

**Scheme S1.** Cyclo-dimerization of *in-situ* formed trimethylsilylethynyl-substituted indeno[1,2-*b*]fluorene derivative reported by Zhao and co-workers.<sup>[3]</sup>

**Competitive reaction experiment:** A mixture of **DFTh** (10.2 mg, 17.3  $\mu\text{mol}$ ) and **DFFu** (10.0 mg, 17.3  $\mu\text{mol}$ ) in toluene- $d_8$  (5 mL) was heated at 120 °C under a nitrogen atmosphere. Tributyltin hydride (0.10 mL, 0.35 mmol, 20 equiv) was added, and the resulting mixture was stirred for 0.5 h. The solution was directly transferred to the NMR tube, and the  $^1\text{H}$  NMR spectrum was measured (Figure S1). The ratio of **DFThH** to **DFFuH** to **DFFu** was determined to be 1.0 to 0.81 to 0.19; **DFTh** was almost completely consumed.

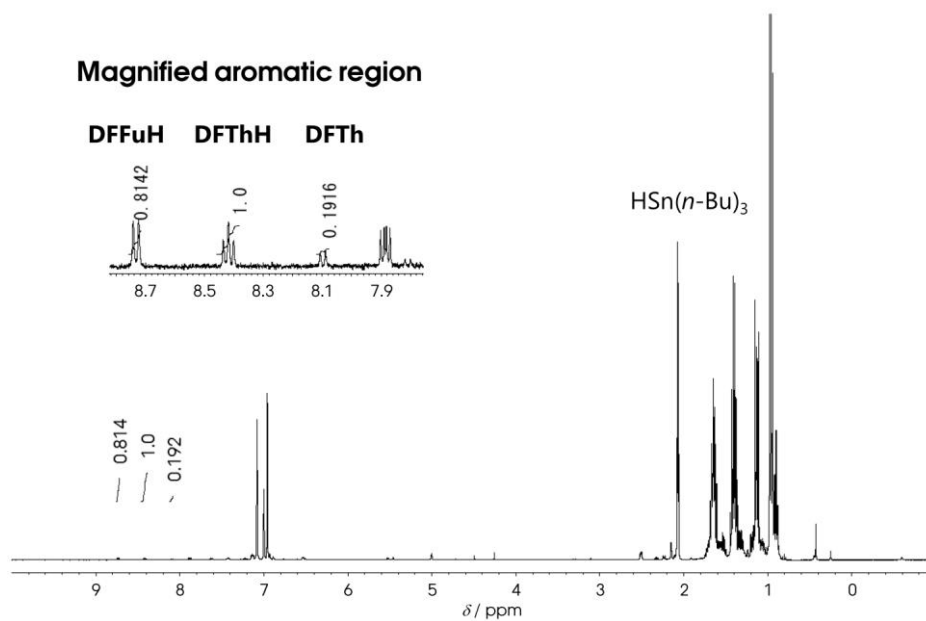

**Figure S1.**  $^1\text{H}$  NMR spectrum of the products in toluene- $d_8$ , which was obtained by the competitive reaction experiment using **DFTh**, **DFFu**, and tributyltin hydride.

**Reaction of DFTh with AIBN:** To a solution of DFTh (40 mg, 67  $\mu\text{mol}$ ) in dry toluene (10 mL) was added AIBN (33 mg, 202  $\mu\text{mol}$ , 3.0 equiv) at room temperature. The resulting mixture was heated at 110  $^{\circ}\text{C}$  for *ca.* 10 min under a nitrogen atmosphere; the color of the solution rapidly changed from deep blue to pale blue. After the reaction solvent was removed under reduced pressure, the residue was subjected to recycling gel-permeation chromatography to give the mixture of **1** and **1H** (0.36:1, 21 mg) as a blue solid in a total yield of 42%; the ratio of **1** and **1H** was determined by NMR spectroscopy (Figure S2).

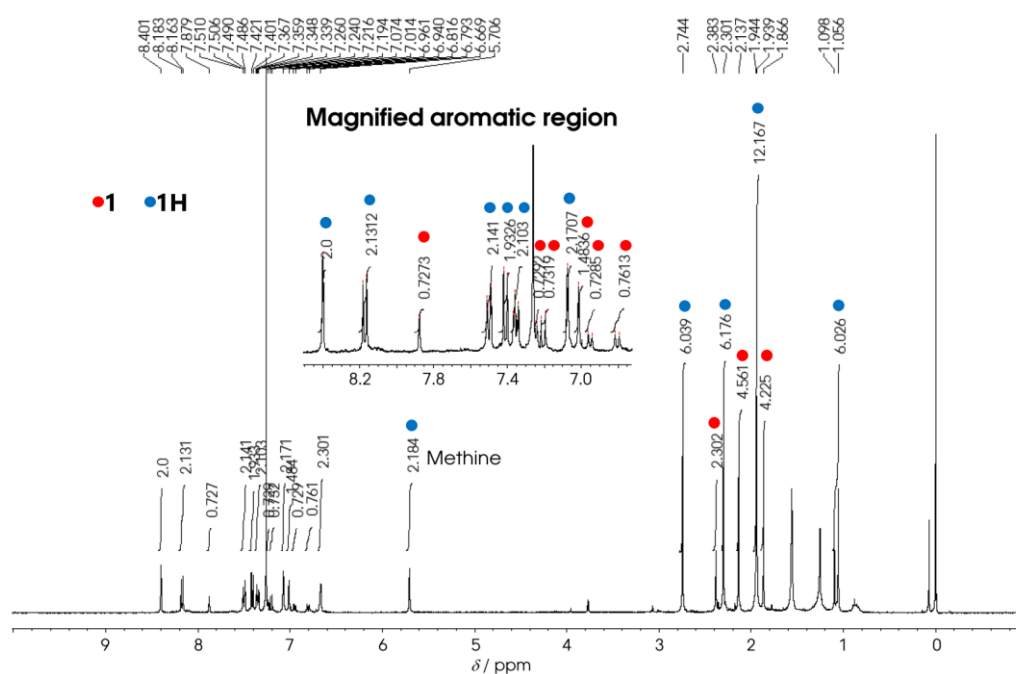

**Figure S2.**  $^1\text{H}$  NMR spectrum of the mixture of **1** and **1H** in  $\text{CDCl}_3$ , which was obtained by the reaction of DFTh with AIBN in toluene at 110  $^{\circ}\text{C}$  for *ca.* 10 min.

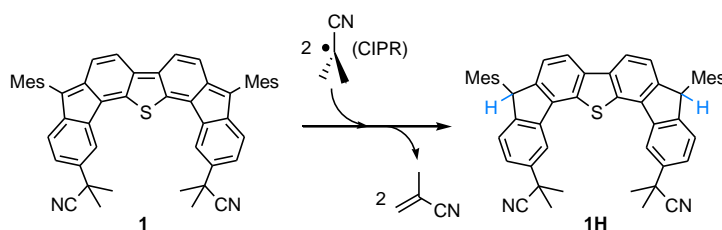

**Scheme S2.** Plausible reaction of **1** with CIPR to afford **1H**.

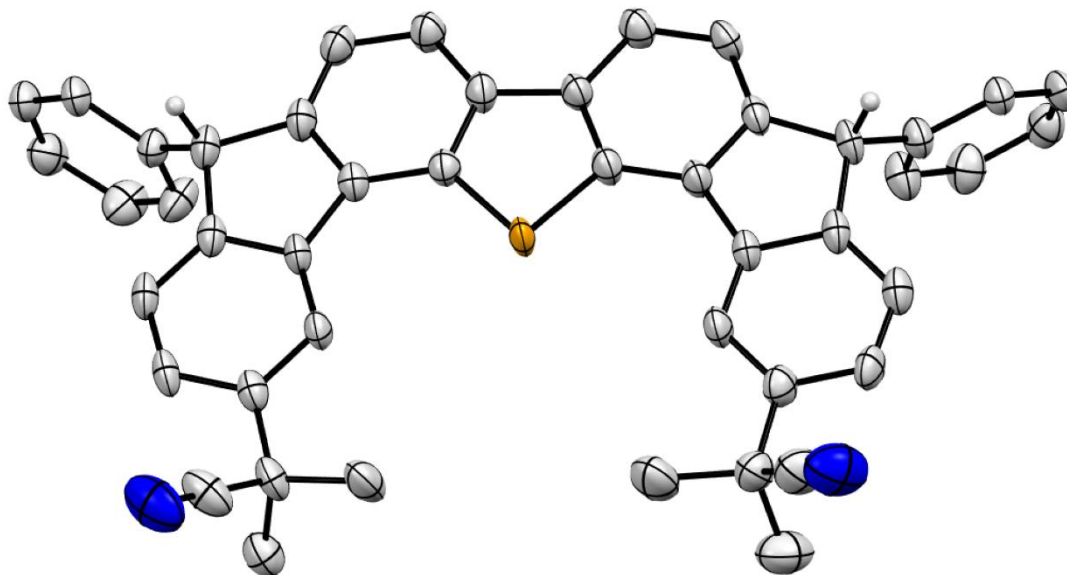

**Figure S3.** X-ray crystal structure of **1H** (meso compound). Displacement ellipsoids are shown at the 50% probability level. Most hydrogen atoms, Me groups, and the solvent molecule are omitted for clarity.

Low-temperature X-ray diffraction data for **1H** were collected on a Rigaku AFC10 diffractometer coupled to a Rigaku AFC HyPix-6000 detector with Mo K $\alpha$  radiation ( $\lambda = 0.71073 \text{ \AA}$ ) from an FR-E+ X-ray source. The diffraction images were processed and spaced using the CrysAlisPro software.<sup>[4]</sup> Using Olex2,<sup>[5]</sup> the structures were solved through intrinsic phasing using SHELXT<sup>[6]</sup> and refined against  $F^2$  on all data by full-matrix least squares with SHELXL<sup>[7]</sup> following established refinement strategies. All non-hydrogen atoms were refined anisotropically. All hydrogen atoms bound to carbon were included in the model at geometrically calculated positions and refined using a riding model. The isotropic displacement parameters of all hydrogen atoms were fixed to 1.2 times the Ueq value of the atoms they are linked to (1.5 times for methyl groups).

**1H**: crystal data at 113 K for  $C_{52}H_{46}N_2S \cdot CH_3CN$ ,  $M_r = 772.02$ , Triclinic, space group  $P-1$ ,  $D_{\text{calcd}} = 1.076 \text{ g cm}^{-3}$ ,  $Z = 2$ ,  $a = 11.0183(8) \text{ \AA}$ ,  $b = 14.4087(10) \text{ \AA}$ ,  $c = 17.3579(9) \text{ \AA}$ ,  $\alpha = 65.994(6)^\circ$ ,  $\beta = 102.478(7)^\circ$ ,  $\gamma = 65.994(6)^\circ$ ,  $V = 2383.1(3) \text{ \AA}^3$ ; Mo-K $\alpha$  radiation,  $\lambda = 0.71073$ ,  $\mu = 0.104 \text{ mm}^{-1}$ . Numbers of measured and unique reflections were 39193 [ $R_{\text{int}} = 0.1182$ ,  $R_{\text{sigma}} = 0.1385$ ] and 10929, respectively. Final  $R(F) = 0.0884$  for 545 parameters and 10929 reflections with  $I > 2\sigma(I)$  (for all data,  $R(F)$  and  $wR(F^2)$  values are 0.1642 and 0.2488, respectively). CCDC-2231637.

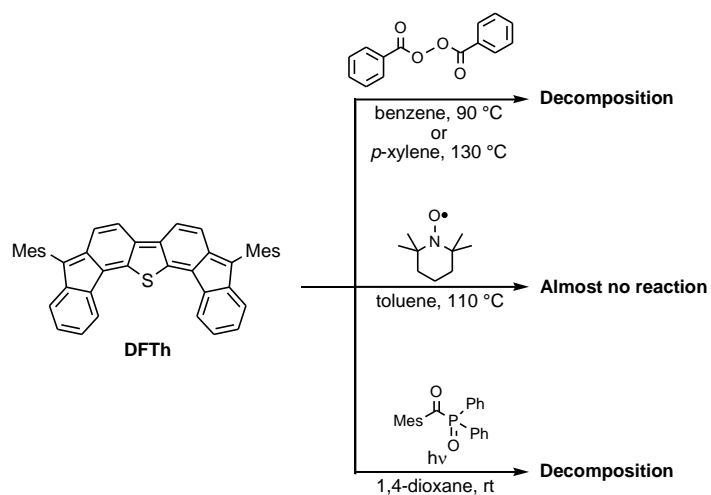

**Scheme S3.** Reactions of **DFTh** with benzoyl peroxide, 2,2,6,6-tetramethylpiperidine 1-oxyl, or (2,4,6-trimethylbenzoyl)diphenylphosphine oxide.

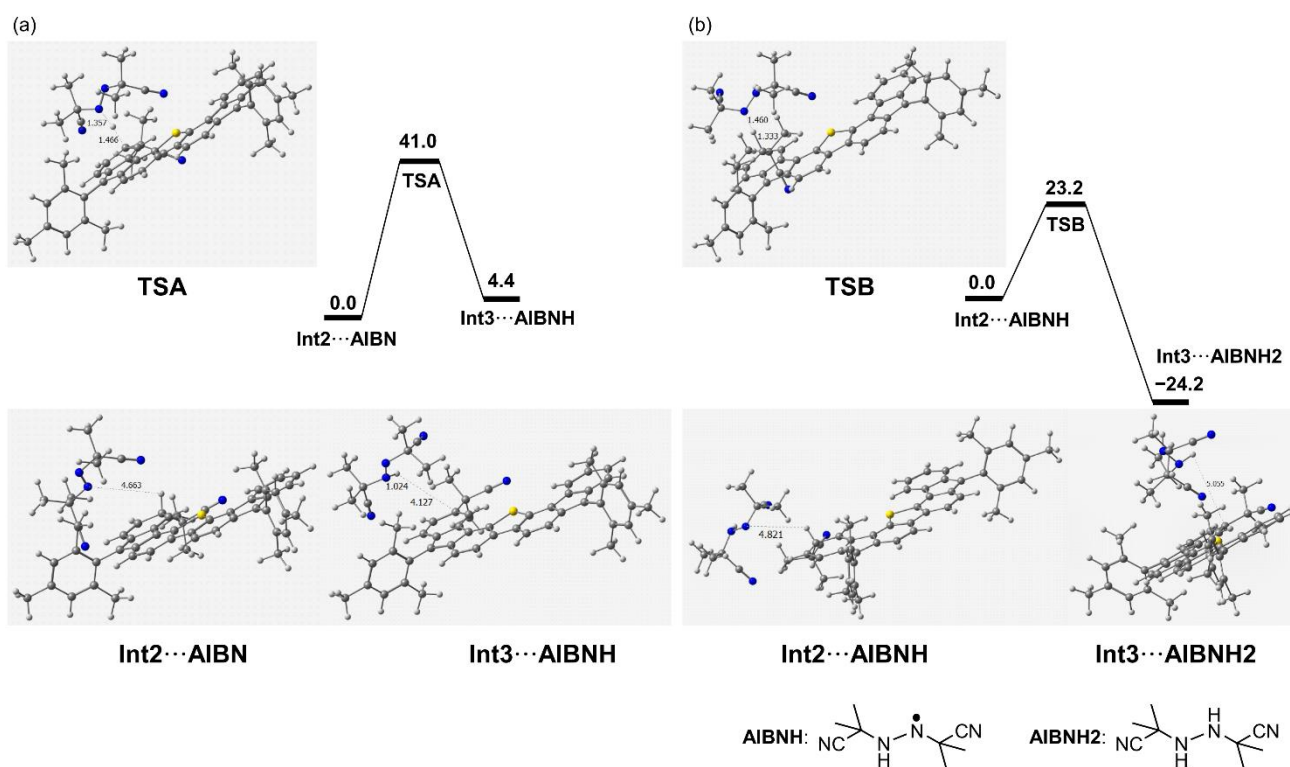

**Figure S4.** Potential energy diagrams for the H-atom transfer from **Int2** to (a) AIBN or (b) AIBNH<sub>2</sub> to afford **Int3**, calculated at the B3LYP/6-31G\*\* level; units are given in kcal/mol.

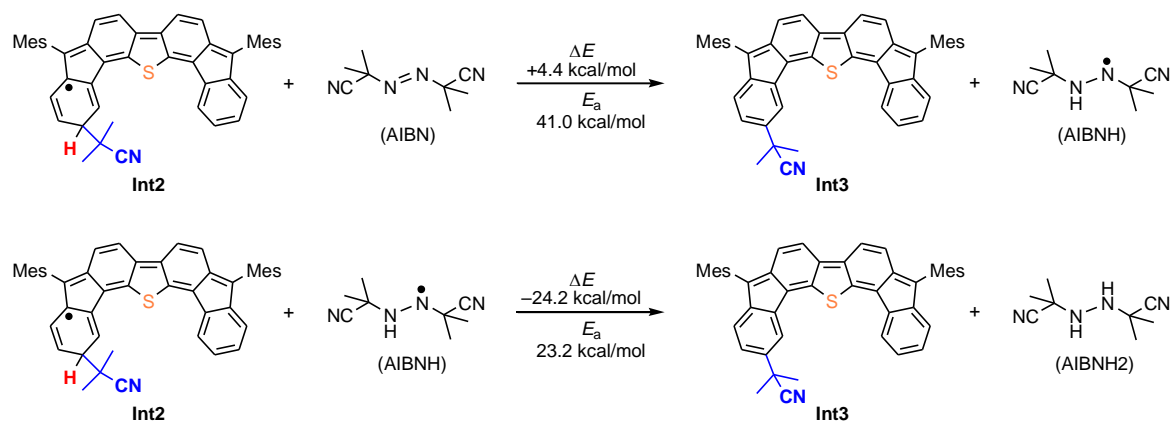

**Scheme S4.** H-atom transfer from **Int2** to AIBN or AIBNH to afford **Int3**, calculated at the B3LYP/6-31G\*\* level.

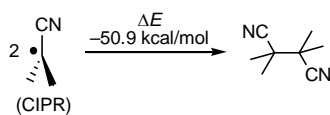

**Scheme S5.** Dimerization of CIPR calculated at the B3LYP/6-31G\*\* level.

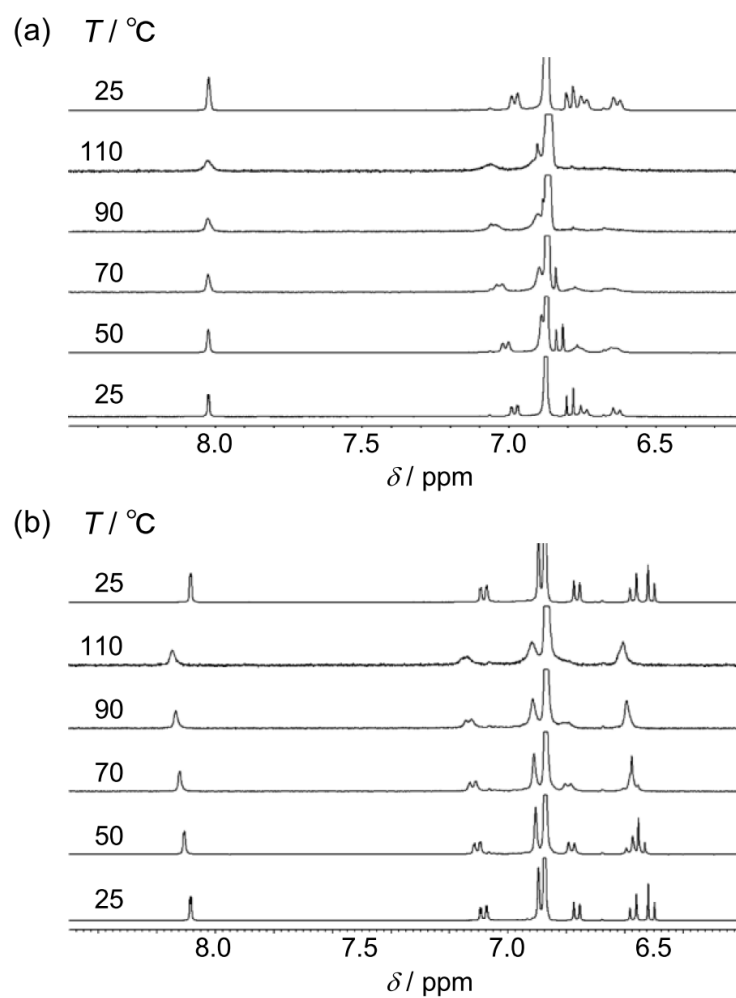

**Figure S5.** Temperature-dependent  $^1\text{H}$  NMR spectra of (a) **1** and (b) **6** (*p*-xylene- $d_{10}$ , 400 MHz). The original spectra were recovered upon cooling to 25  $^\circ\text{C}$ .

The open-shell singlet diradical character index  $y$  was calculated based on the natural orbital occupation number (NOON) of the LUMO in spin-unrestricted LC-BLYP calculation using 6-311G\* basis set. According to the Yamaguchi scheme,<sup>8</sup>  $y$  value is expressed as

$$y = 1 - (2T / (1 + T^2))$$

where  $T$  is the orbital overlap between the corresponding orbital pairs and it can be presented using the NOON of HOMO and LUMO.

$$T = (n_{\text{HOMO}} - n_{\text{LUMO}}) / 2$$

The  $y$  values obtained by this method are listed in Table S1.

**Table S1.** Relative Energies and Open-Shell Singlet Diradical Character Indexes

| Compd        | $\Delta E$ (OS – CS) <sup>[a]</sup> | $\Delta E$ (S <sub>0</sub> – T <sub>1</sub> ) <sup>[b]</sup> | $y$ <sup>[c]</sup> |
|--------------|-------------------------------------|--------------------------------------------------------------|--------------------|
| <b>DFTh'</b> | –2.2                                | –3.7                                                         | 0.50               |
| <b>DFFu'</b> | –1.5                                | –4.3                                                         | 0.45               |
| <b>1'</b>    | –2.3                                | –3.6                                                         | 0.50               |
| <b>2'</b>    | –1.6                                | –4.2                                                         | 0.46               |

<sup>[a]</sup> Open-shell singlet energy minus closed-shell singlet energy (kcal/mol<sup>–1</sup>; (U)M06-2X/6-311G\*).

<sup>[b]</sup> Open-shell singlet energy minus unrestricted triplet energy (kcal/mol<sup>–1</sup>; (U)M06-2X/6-311G\*).

<sup>[c]</sup> Open-shell singlet diradical character index.

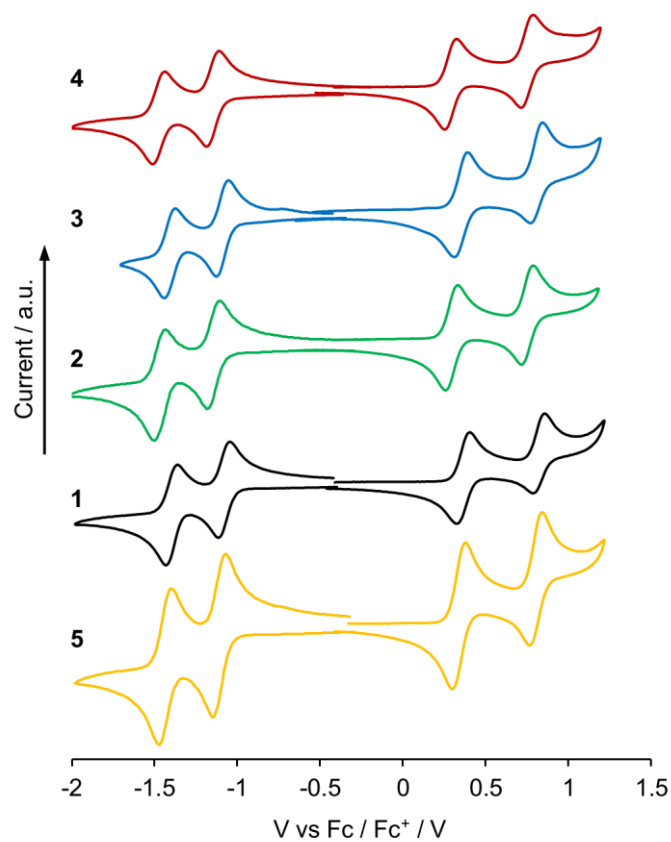

**Figure S6.** Cyclic voltammograms of **1–5** in  $\text{CH}_2\text{Cl}_2$  containing  $0.1 \text{ mol L}^{-1} [(n\text{-Bu})_4\text{N}][\text{PF}_6]$  as a supporting electrolyte at a scan rate of  $100 \text{ mV s}^{-1}$ .

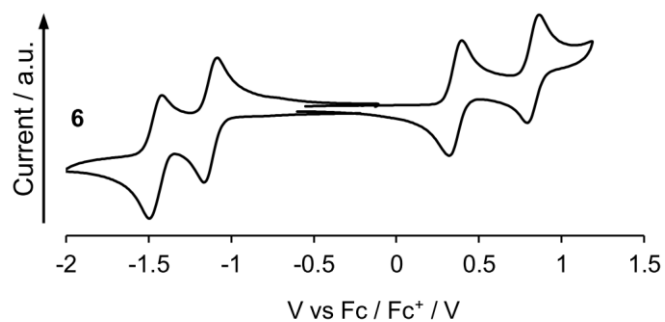

**Figure S7.** Cyclic voltammograms of **6** in  $\text{CH}_2\text{Cl}_2$  containing  $0.1 \text{ mol L}^{-1} [(n\text{-Bu})_4\text{N}][\text{PF}_6]$  as a supporting electrolyte at a scan rate of  $100 \text{ mV s}^{-1}$ .



**Table S2.** Redox Potentials Determined by Cyclic Voltammetry<sup>[a]</sup>

| Cmpd.       | $E_{\text{ox}}$ [V] | $E_{\text{red}}$ [V] | $\Delta E_{\text{redox}}$ [V] <sup>[b]</sup> |
|-------------|---------------------|----------------------|----------------------------------------------|
| <b>DFTh</b> | +0.31               | -1.14                | 1.45                                         |
|             | +0.78               | -1.47                |                                              |
| <b>1</b>    | +0.38               | -1.08                | 1.46                                         |
|             | +0.83               | -1.40                |                                              |
| <b>2</b>    | +0.30               | -1.14                | 1.44                                         |
|             | +0.75               | -1.47                |                                              |
| <b>3</b>    | +0.36               | -1.09                | 1.45                                         |
|             | +0.81               | -1.41                |                                              |
| <b>4</b>    | +0.29               | -1.15                | 1.44                                         |
|             | +0.75               | -1.48                |                                              |
| <b>5</b>    | +0.34               | -1.11                | 1.45                                         |
|             | +0.81               | -1.43                |                                              |
| <b>DFFu</b> | +0.32               | -1.17                | 1.49                                         |
|             | +0.81               | -1.51                |                                              |
| <b>6</b>    | +0.36               | -1.13                | 1.49                                         |
|             | +0.81               | -1.46                |                                              |

<sup>[a]</sup> Scan rate 100 mV s<sup>-1</sup>. <sup>[b]</sup>  $\Delta E_{\text{redox}} = E_{\text{ox}}^1 - E_{\text{red}}^1$

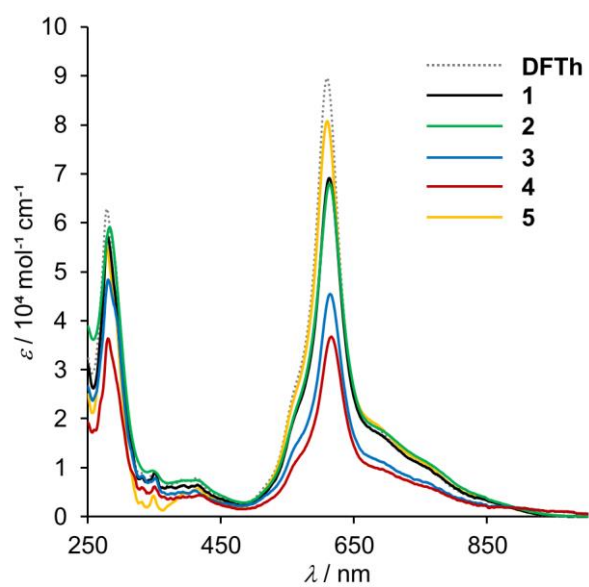

**Figure S8.** Electronic absorption spectra of **DFTh** and its derivatives **1–5** in  $\text{CH}_2\text{Cl}_2$ .

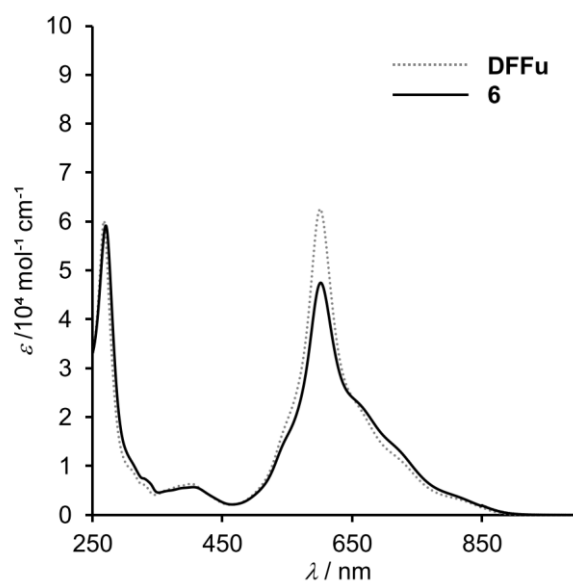

**Figure S9.** Electronic absorption spectra of **DFFu** and its derivatives **6** in  $\text{CH}_2\text{Cl}_2$ .



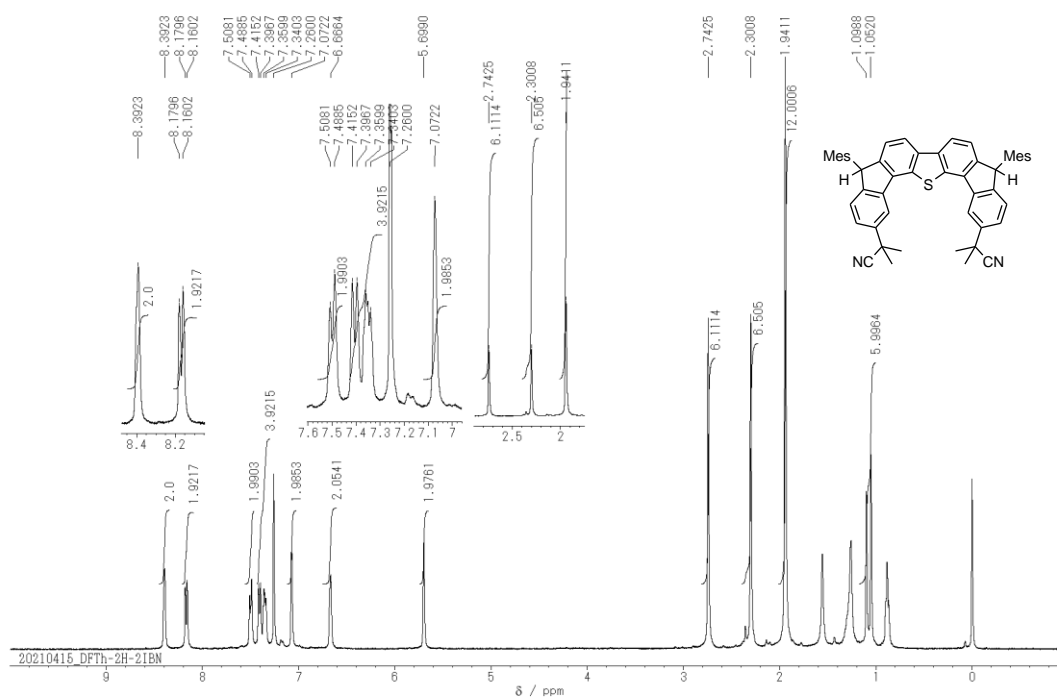

<sup>1</sup>H NMR spectrum of **1H** in CDCl<sub>3</sub> solution (400 MHz).

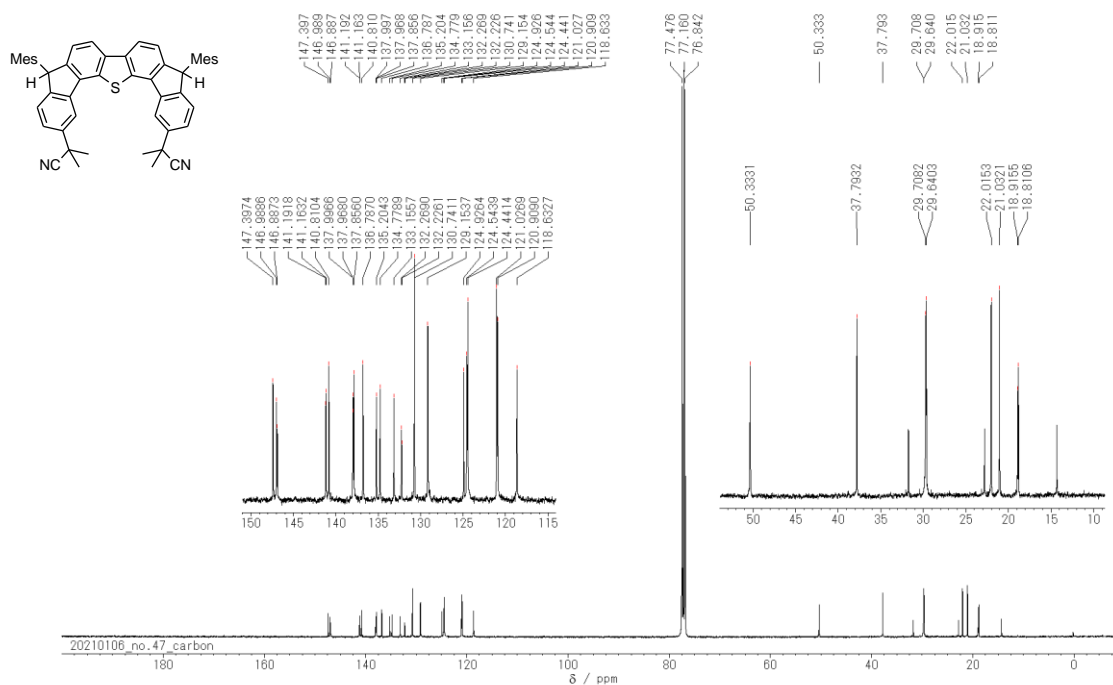

<sup>13</sup>C NMR spectrum of **1H** in CDCl<sub>3</sub> solution (100 MHz).

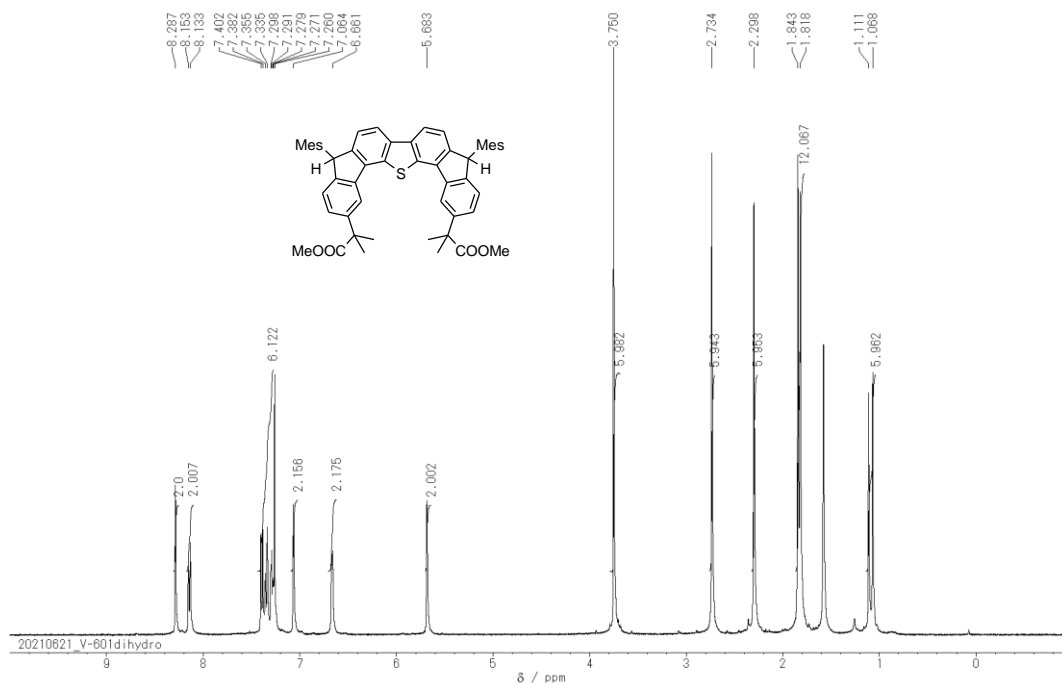

<sup>1</sup>H NMR spectrum of **2H** in CDCl<sub>3</sub> solution (400 MHz).

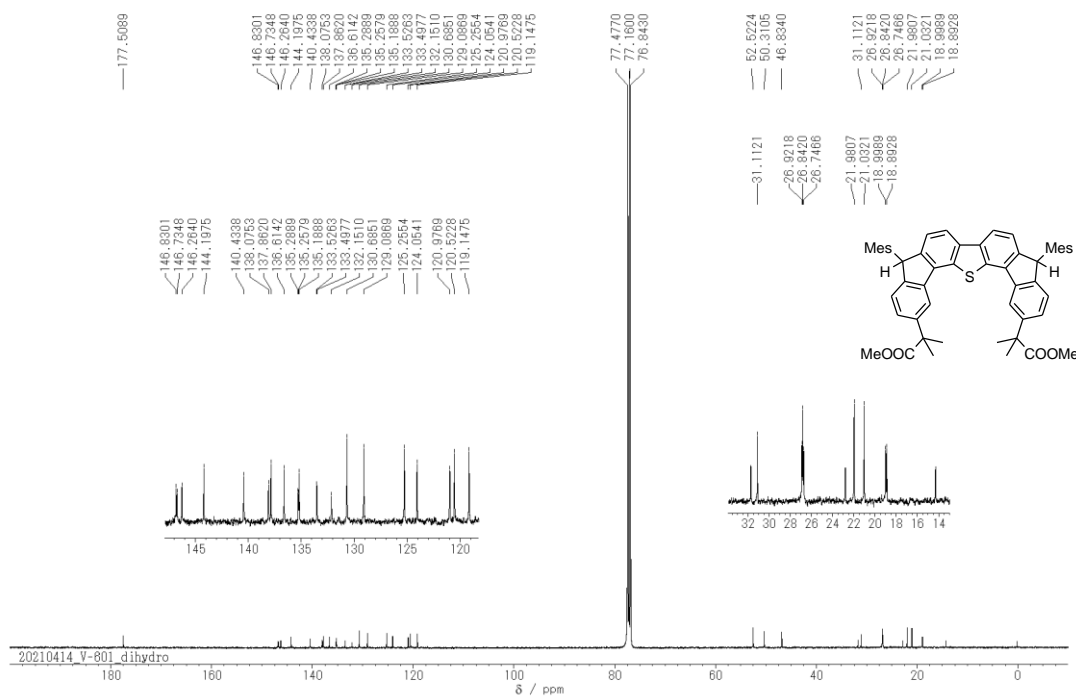

<sup>13</sup>C NMR spectrum of **2H** in CDCl<sub>3</sub> solution (100 MHz).

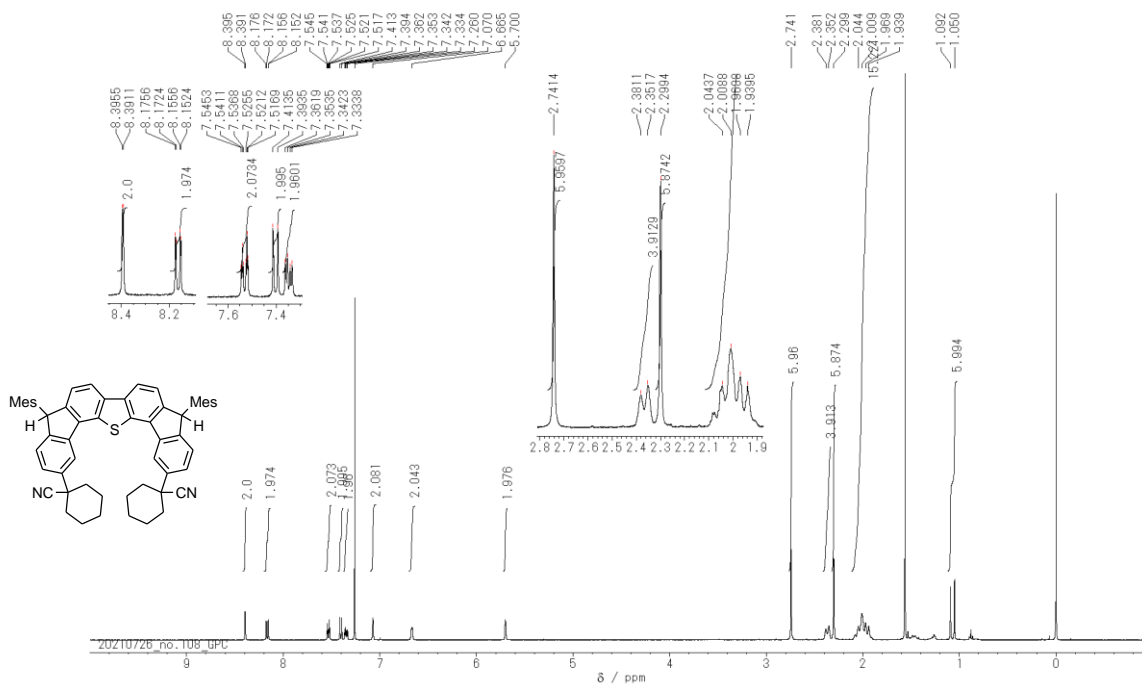

<sup>1</sup>H NMR spectrum of **3H** in CDCl<sub>3</sub> solution (400 MHz).

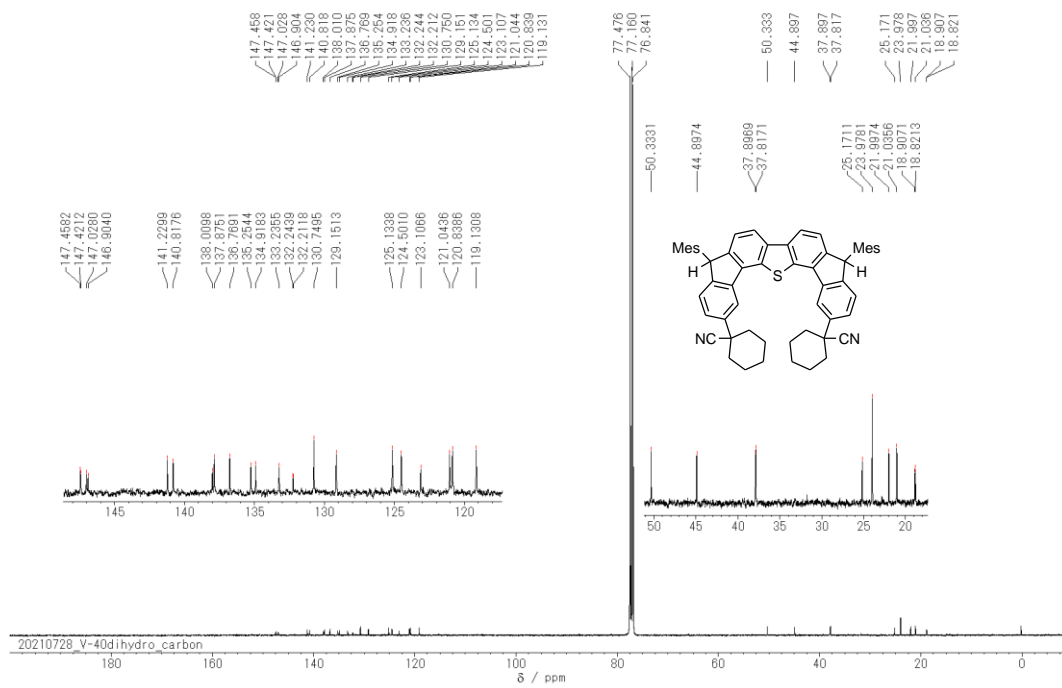

<sup>13</sup>C NMR spectrum of **3H** in CDCl<sub>3</sub> solution (100 MHz).

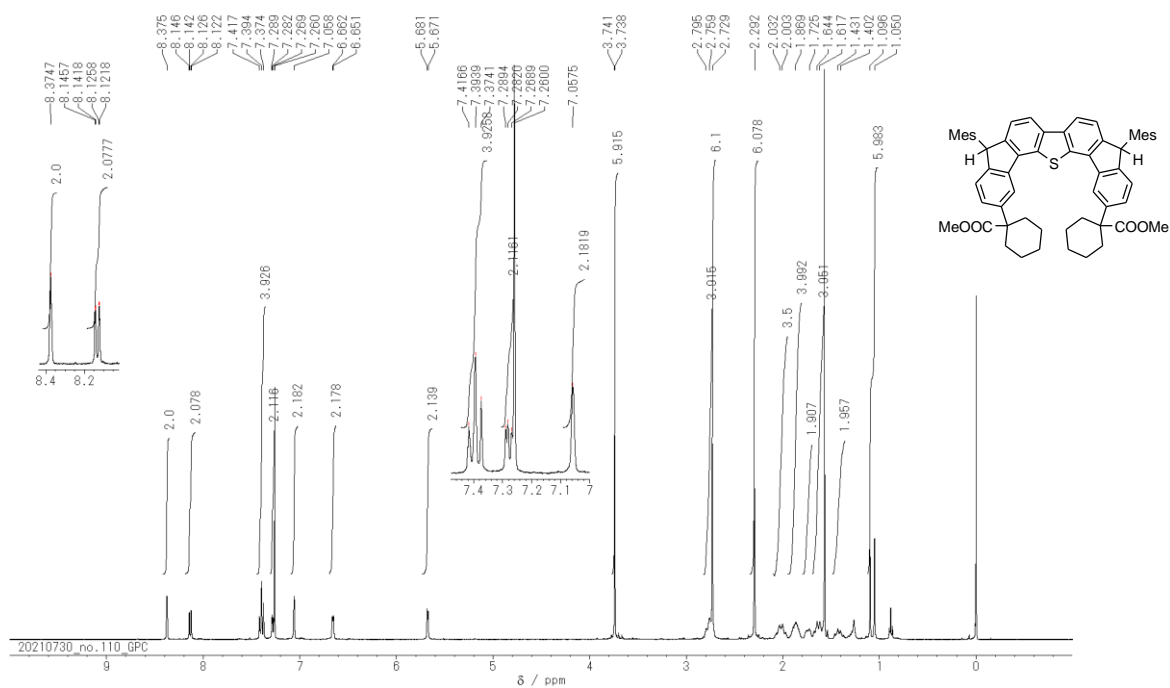

<sup>1</sup>H NMR spectrum of **4H** in CDCl<sub>3</sub> solution (400 MHz).

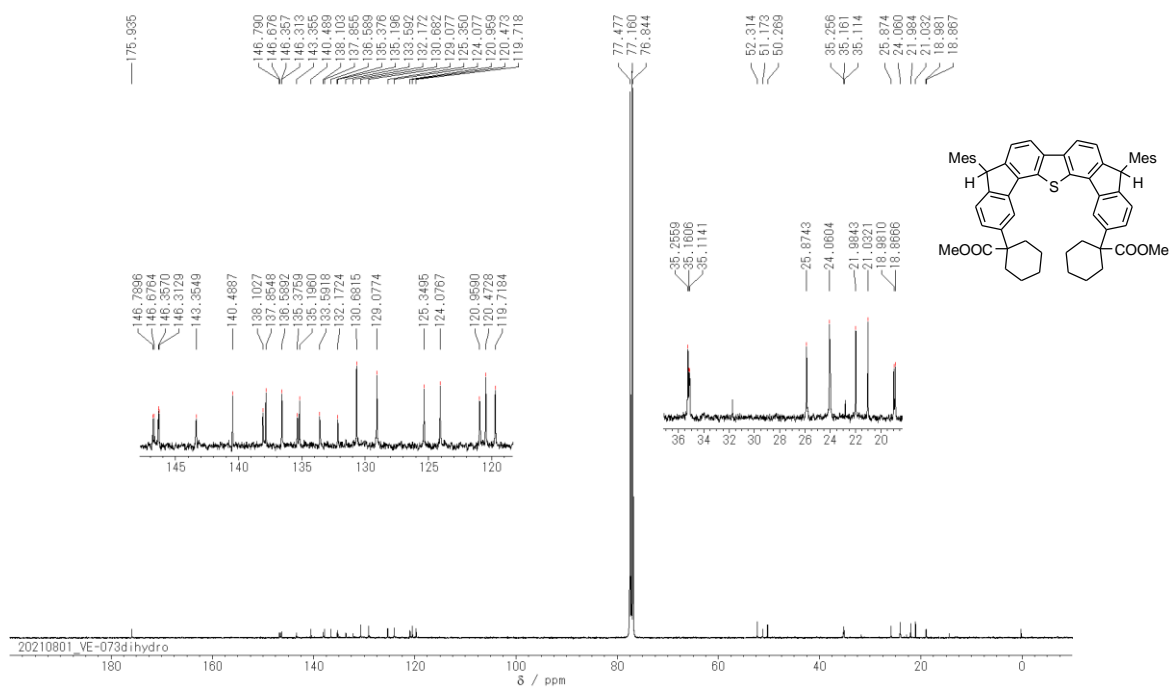

<sup>13</sup>C NMR spectrum of **4H** in CDCl<sub>3</sub> solution (100 MHz).





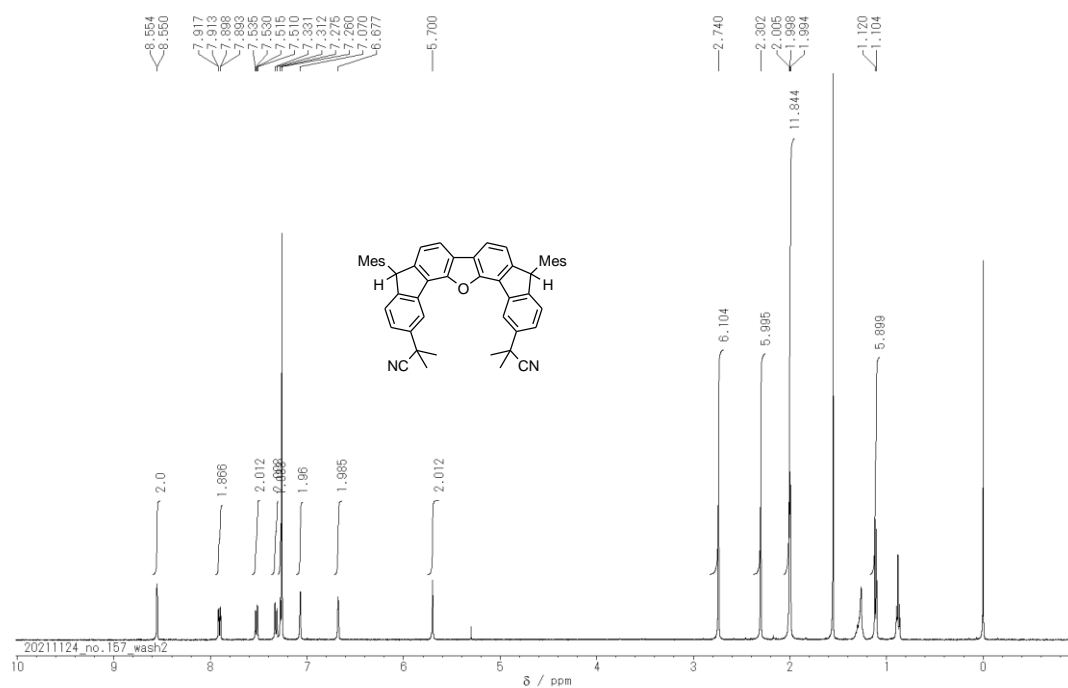

<sup>1</sup>H NMR spectra of **6H** in CDCl<sub>3</sub> solution (400 MHz).

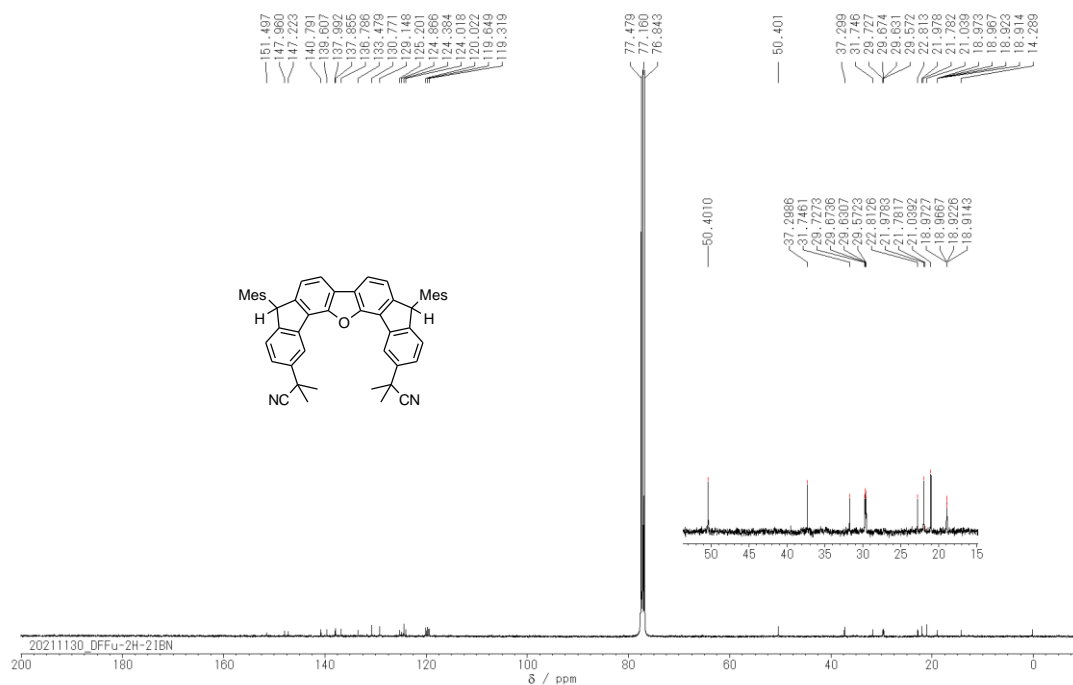

<sup>13</sup>C NMR spectrum of **6H** in CDCl<sub>3</sub> solution (100 MHz).



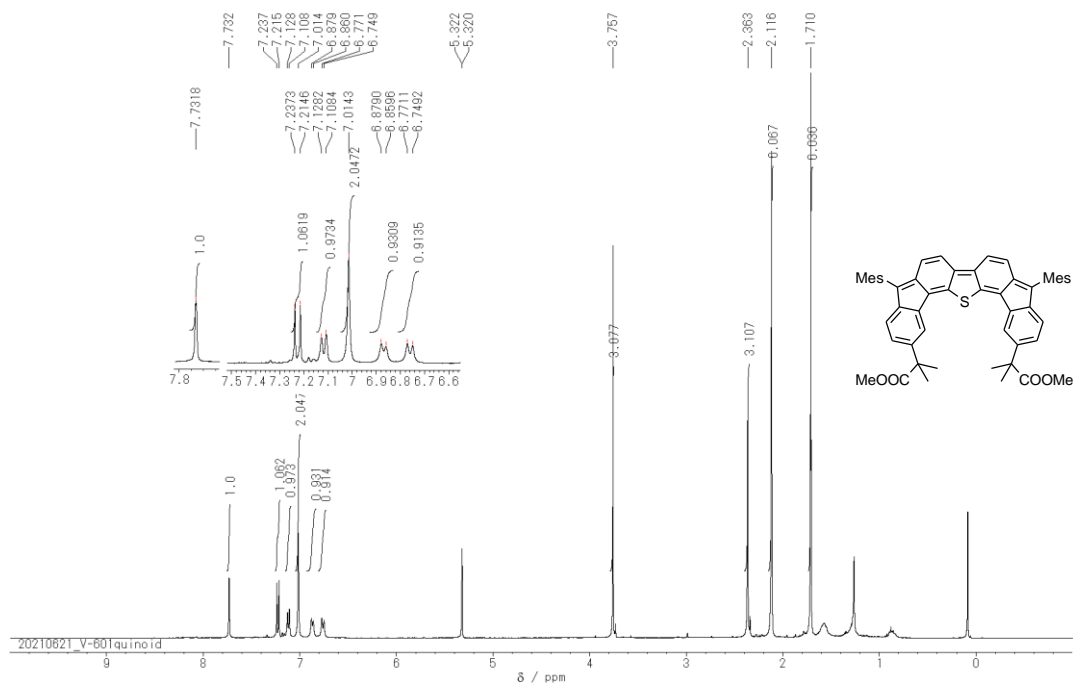

<sup>1</sup>H NMR spectra of **2** in CDCl<sub>3</sub>/Et<sub>3</sub>N solution (400 MHz).

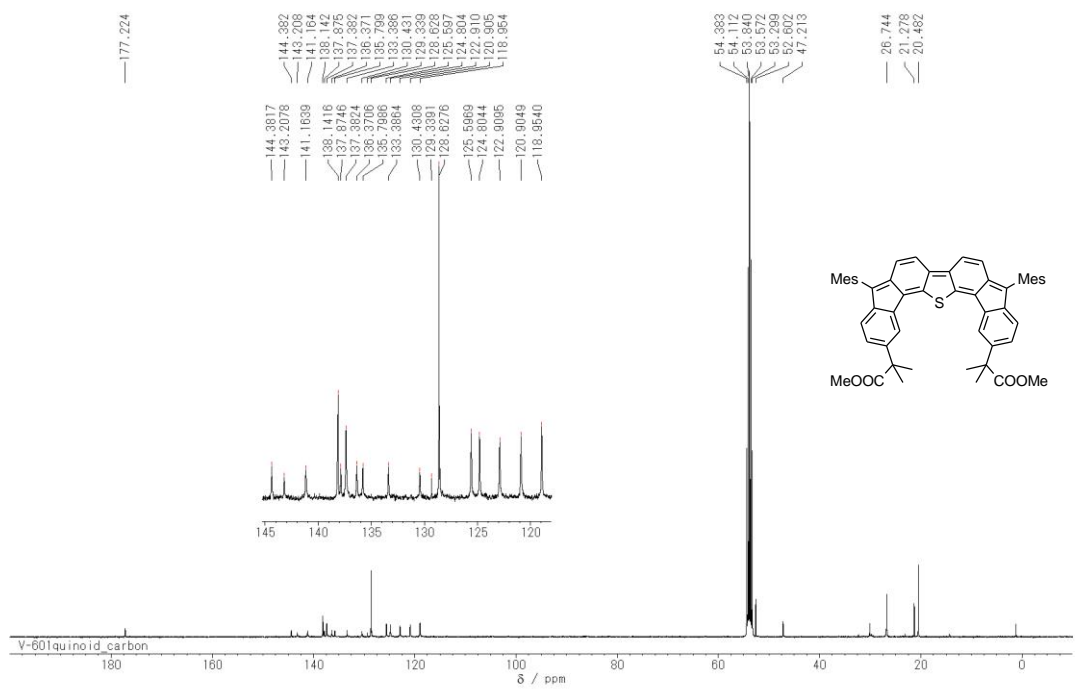

<sup>13</sup>C NMR spectrum of **2** in CD<sub>2</sub>Cl<sub>2</sub> solution (100 MHz).

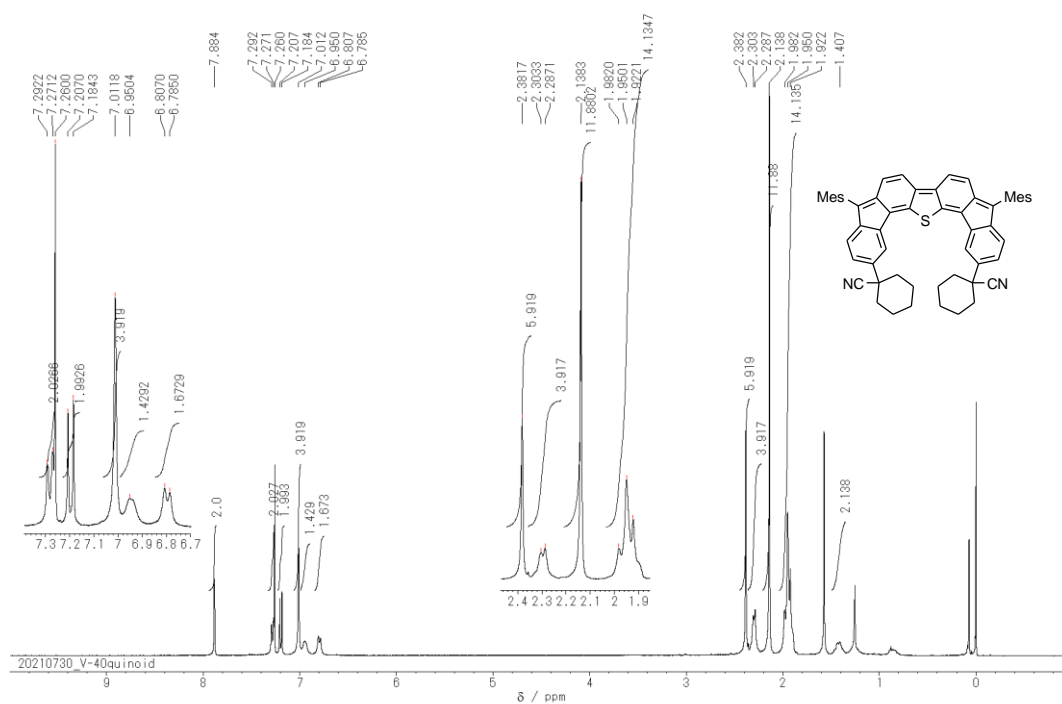

<sup>1</sup>H NMR spectra of **3** in CDCl<sub>3</sub>/Et<sub>3</sub>N solution (400 MHz).

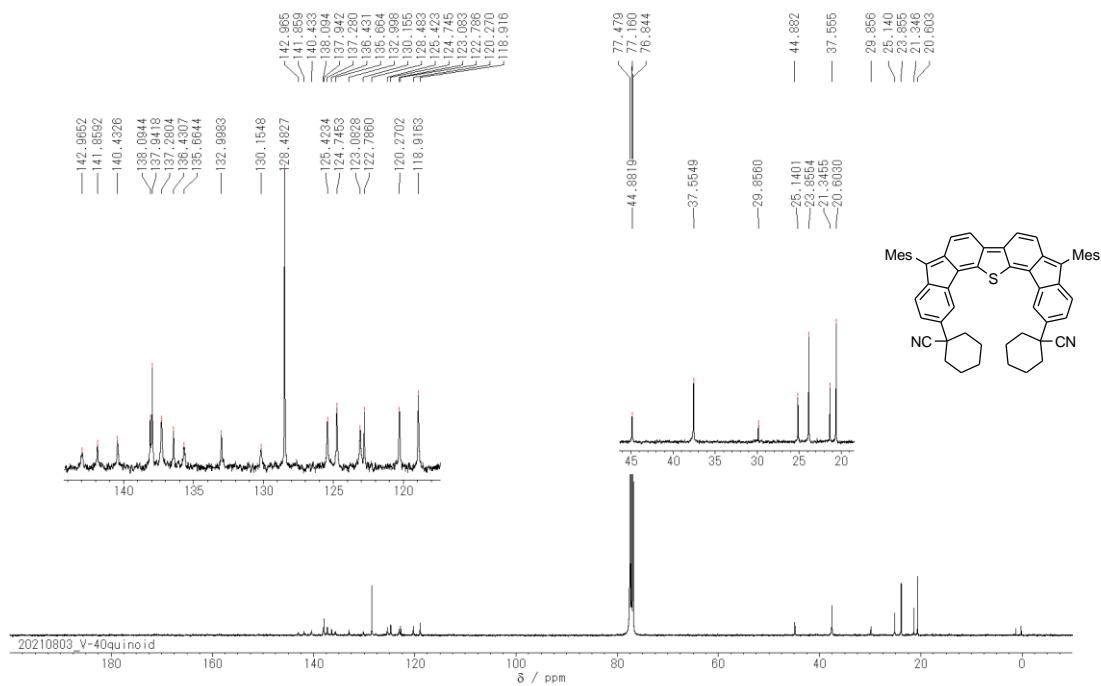

<sup>13</sup>C NMR spectrum of **3** in CD<sub>2</sub>Cl<sub>2</sub> solution (100 MHz).

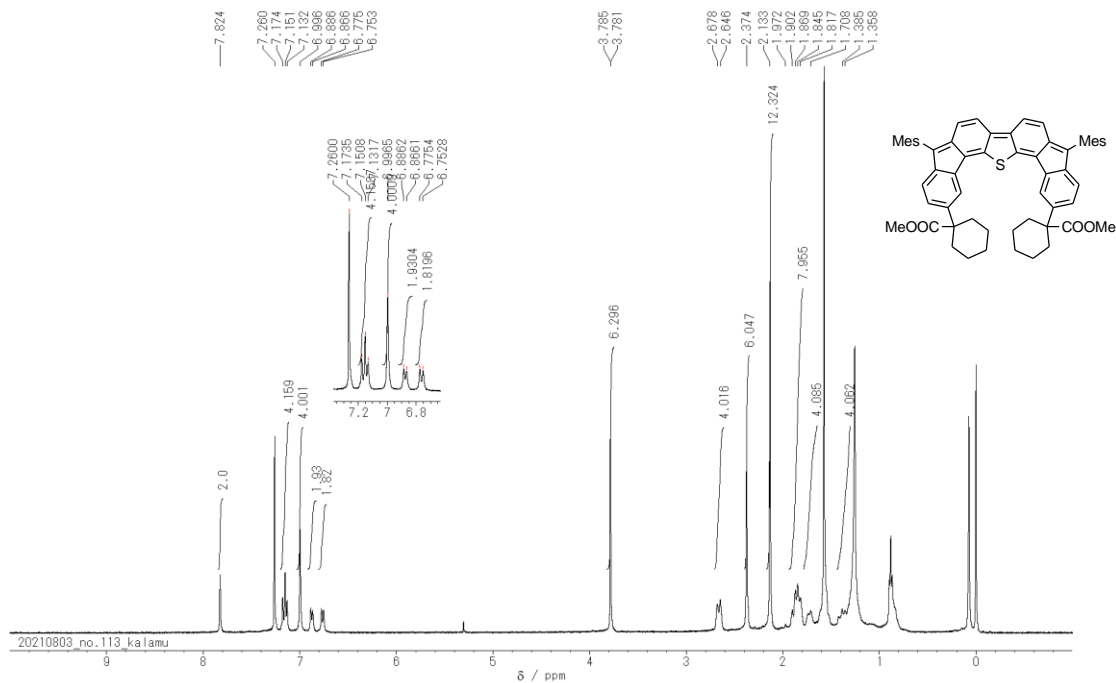

<sup>1</sup>H NMR spectra of 4 in CDCl<sub>3</sub>/Et<sub>3</sub>N solution (400 MHz).

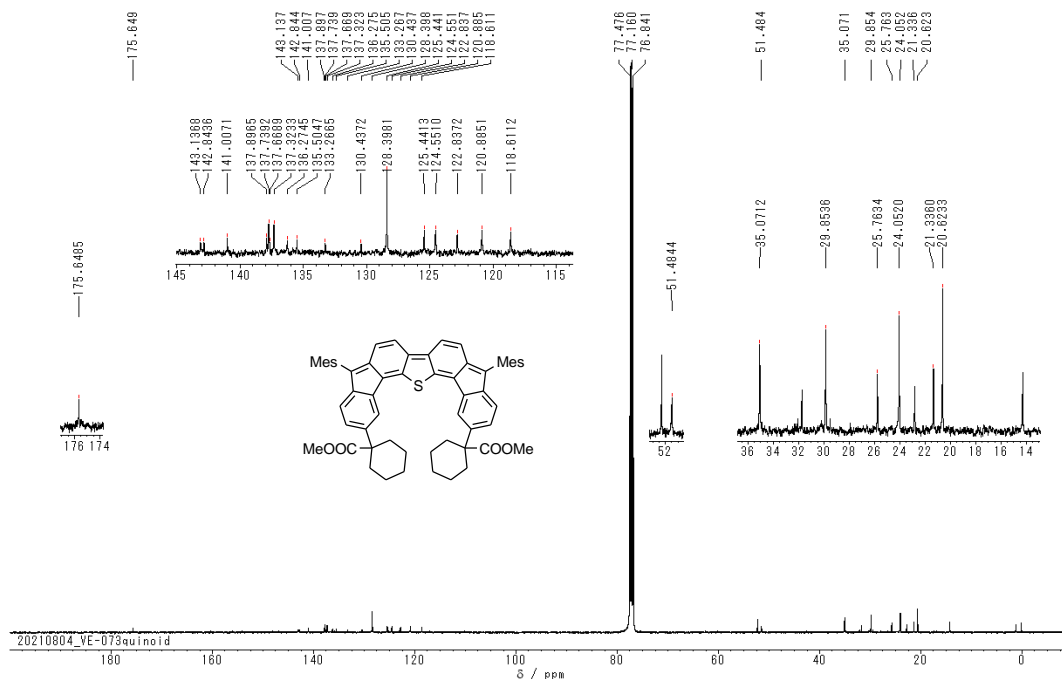

<sup>13</sup>C NMR spectrum of 4 in CD<sub>2</sub>Cl<sub>2</sub> solution (100 MHz).

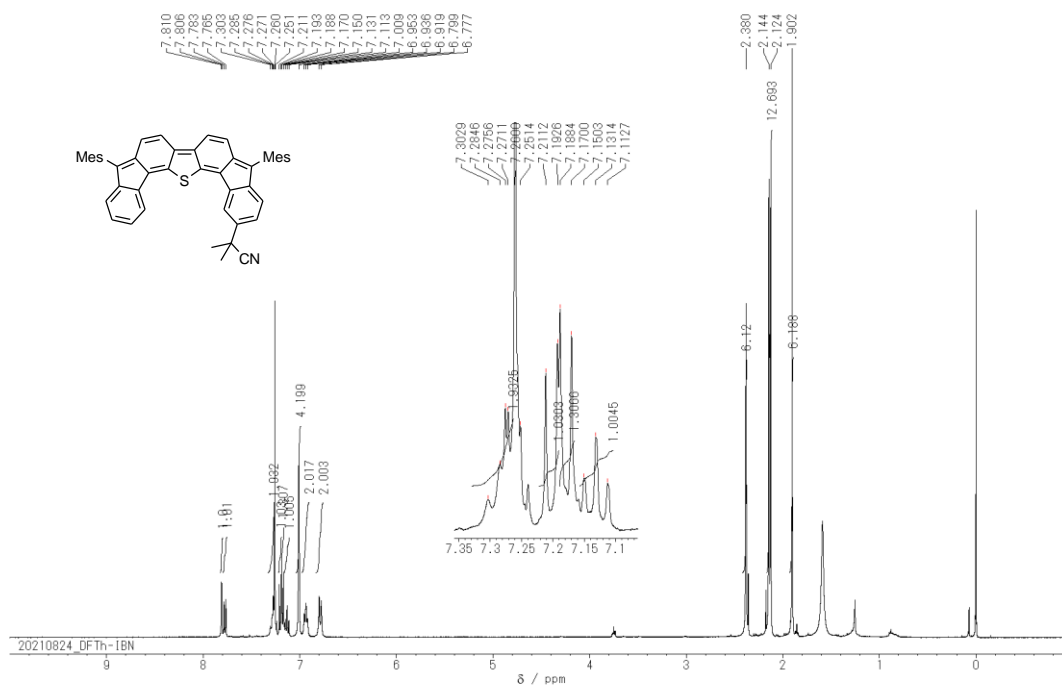

<sup>1</sup>H NMR spectra of **5** in CDCl<sub>3</sub> solution (400 MHz).

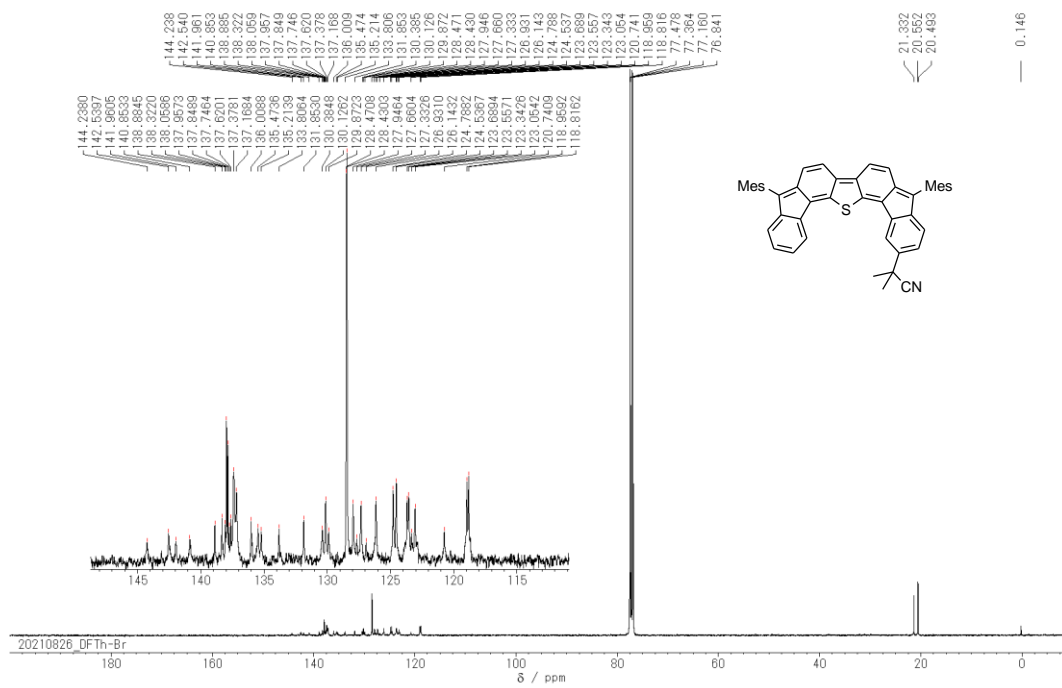

<sup>13</sup>C NMR spectra of **5** in CDCl<sub>3</sub> solution (100 MHz).

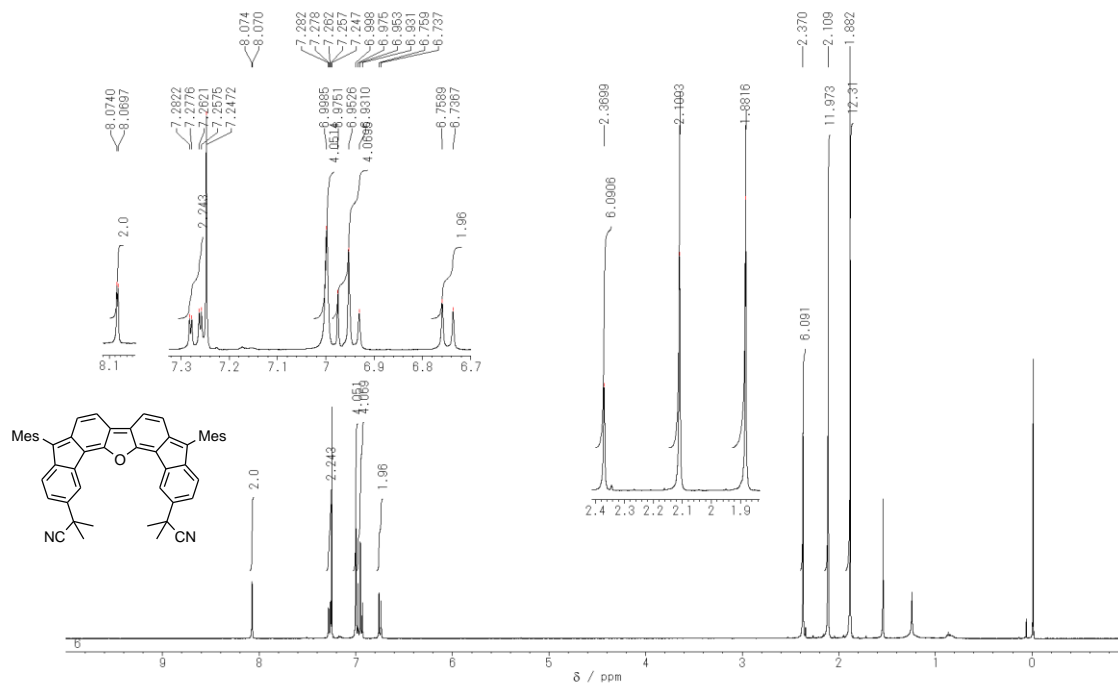

<sup>1</sup>H NMR spectra of **6** in CDCl<sub>3</sub> solution (400 MHz).

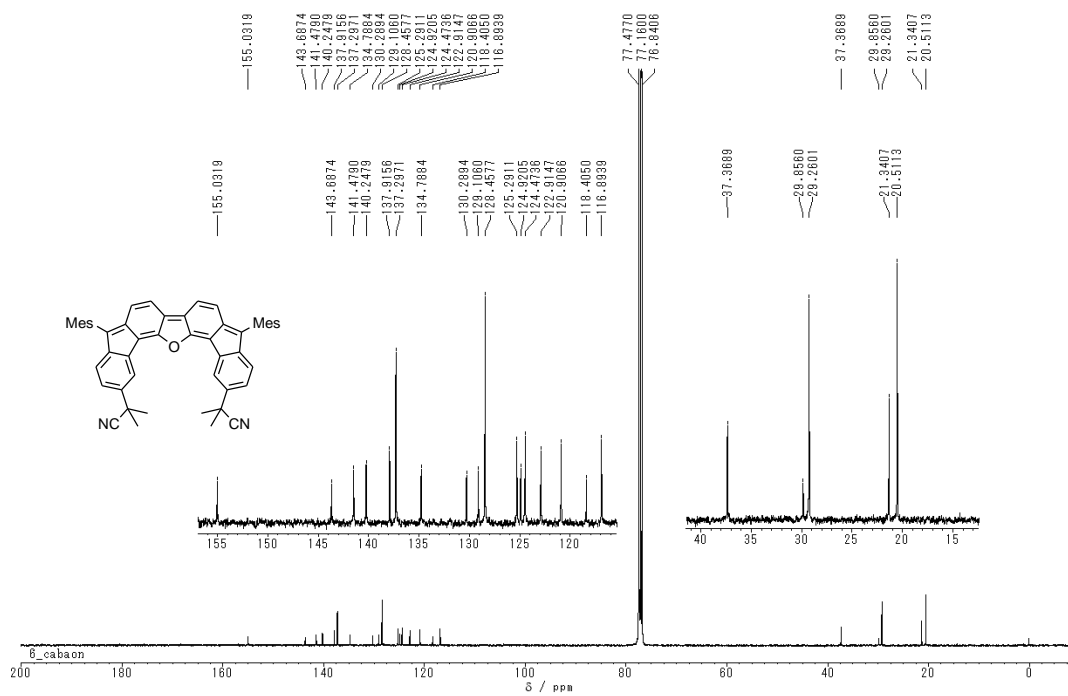

<sup>13</sup>C NMR spectra of **6** in CDCl<sub>3</sub> solution (100 MHz).

## 4. Theoretical Calculations

All optimized structures for the analysis of reaction mechanisms were obtained using B3LYP functional<sup>[9,10]</sup> with 6-31G\*\* basis set<sup>[11]</sup> as implemented in the *Gaussian 16* program package.<sup>[11]</sup> Using the vibrational frequency analysis, we confirmed that the obtained local minima have no imaginary frequency.

### Optimized structure of A<sup>cs</sup>

| Atom | x         | y         | z         |
|------|-----------|-----------|-----------|
| C    | -0.701391 | -0.751037 | 0.001858  |
| C    | -1.262856 | 0.582203  | 0.004021  |
| C    | 1.262470  | 0.581753  | -0.005837 |
| C    | 0.700537  | -0.751282 | -0.003066 |
| C    | -1.585395 | -1.879490 | 0.001072  |
| C    | -2.941732 | -1.703599 | 0.003720  |
| C    | -3.495340 | -0.385652 | 0.013109  |
| C    | -2.617864 | 0.777744  | 0.008806  |
| C    | 2.617551  | 0.776811  | -0.010504 |
| C    | 3.494635  | -0.386882 | -0.014136 |
| C    | 2.940552  | -1.704635 | -0.004054 |
| C    | 1.584150  | -1.880039 | -0.001512 |
| C    | 3.474058  | 1.961378  | -0.012230 |
| C    | 4.822617  | 1.494421  | -0.012816 |
| C    | 4.821417  | 0.035526  | -0.014379 |
| C    | -4.821974 | 0.037192  | 0.013529  |
| C    | -4.822705 | 1.496087  | 0.011809  |
| C    | -3.473988 | 1.962592  | 0.010511  |
| C    | 3.203696  | 3.325658  | -0.019927 |
| C    | 4.276306  | 4.229282  | -0.028755 |
| C    | 5.598256  | 3.772806  | -0.033965 |
| C    | 5.882560  | 2.402992  | -0.028855 |
| C    | -5.882345 | 2.405015  | 0.028330  |
| C    | -5.597565 | 3.774735  | 0.033145  |
| C    | -4.275467 | 4.230764  | 0.027125  |
| C    | -3.203161 | 3.326780  | 0.017855  |
| C    | -6.031489 | -0.821857 | 0.023622  |
| C    | -6.777272 | -1.007268 | -1.162520 |
| C    | -7.919021 | -1.813011 | -1.129315 |
| C    | -8.347913 | -2.441177 | 0.043143  |
| C    | -7.600726 | -2.239912 | 1.206510  |
| C    | -6.450395 | -1.444946 | 1.220523  |
| C    | -5.690424 | -1.248407 | 2.513270  |
| C    | -6.345811 | -0.366999 | -2.462469 |
| C    | -9.568088 | -3.331385 | 0.046427  |
| C    | 6.031089  | -0.823274 | -0.023335 |
| C    | 6.774203  | -1.010224 | 1.164336  |
| C    | 7.912379  | -1.821035 | 1.134195  |
| C    | 8.343245  | -2.448782 | -0.037825 |
| C    | 7.594494  | -2.252133 | -1.200901 |
| C    | 6.447631  | -1.452139 | -1.217975 |
| C    | 5.684740  | -1.262927 | -2.510111 |
| C    | 6.338879  | -0.372609 | 2.464301  |
| C    | 9.596557  | -3.291591 | -0.052326 |
| H    | -1.163372 | -2.879027 | -0.006415 |



|   |            |           |           |
|---|------------|-----------|-----------|
| H | -3.610674  | -2.558918 | -0.004811 |
| H | 3.609153   | -2.560216 | 0.005277  |
| H | 1.161790   | -2.879428 | 0.006583  |
| H | 2.183856   | 3.698314  | -0.021206 |
| H | 4.075665   | 5.296371  | -0.034076 |
| H | 6.413491   | 4.490294  | -0.044546 |
| H | 6.909372   | 2.048843  | -0.040314 |
| H | -6.909282  | 2.051242  | 0.040462  |
| H | -6.412557  | 4.492491  | 0.044123  |
| H | -4.074465  | 5.297786  | 0.032196  |
| H | -2.183196  | 3.699094  | 0.018576  |
| H | -8.486689  | -1.954567 | -2.046520 |
| H | -7.924080  | -2.708873 | 2.133345  |
| H | -4.697946  | -1.710324 | 2.475697  |
| H | -6.233091  | -1.690010 | 3.353281  |
| H | -5.534255  | -0.186432 | 2.729064  |
| H | -7.004001  | -0.667114 | -3.282022 |
| H | -5.322021  | -0.652617 | -2.726809 |
| H | -6.360093  | 0.726279  | -2.400815 |
| H | -9.303325  | -4.368474 | -0.195475 |
| H | -10.304468 | -3.004590 | -0.693967 |
| H | -10.053828 | -3.341423 | 1.026733  |
| H | 8.473954   | -1.969374 | 2.054076  |
| H | 7.912218   | -2.731107 | -2.124555 |
| H | 4.693013   | -1.726154 | -2.468960 |
| H | 6.226701   | -1.707205 | -3.349166 |
| H | 5.526639   | -0.202121 | -2.730139 |
| H | 6.352596   | 0.720758  | 2.404112  |
| H | 6.995473   | -0.673290 | 3.284927  |
| H | 5.314666   | -0.659227 | 2.725928  |
| H | 9.761911   | -3.779980 | 0.912784  |
| H | 9.548494   | -4.067885 | -0.821780 |
| H | 10.483320  | -2.680330 | -0.262436 |
| S | 0.000026   | 1.821783  | -0.001223 |

*Optimized structure of A<sup>oss</sup>*

| Atom | x         | y         | z         |
|------|-----------|-----------|-----------|
| C    | -0.726769 | -0.765745 | 0.004061  |
| C    | -1.264410 | 0.550010  | 0.008815  |
| C    | 1.263976  | 0.549585  | -0.010586 |
| C    | 0.725895  | -0.765989 | -0.005786 |
| C    | -1.594733 | -1.873987 | 0.005391  |
| C    | -2.972362 | -1.691640 | 0.013074  |
| C    | -3.499191 | -0.387904 | 0.024955  |
| C    | -2.639502 | 0.754512  | 0.018205  |
| C    | 2.639140  | 0.753621  | -0.019774 |
| C    | 3.498458  | -0.389080 | -0.026358 |
| C    | 2.971186  | -1.692646 | -0.014419 |
| C    | 1.593491  | -1.874518 | -0.006880 |
| C    | 3.487444  | 1.945865  | -0.018081 |
| C    | 4.848285  | 1.497076  | -0.017734 |
| C    | 4.870687  | 0.058541  | -0.024487 |
| C    | -4.871280 | 0.060144  | 0.023402  |
| C    | -4.848422 | 1.498684  | 0.017137  |
| C    | -3.487432 | 1.947023  | 0.017001  |
| C    | 3.201246  | 3.305857  | -0.021874 |
| C    | 4.262325  | 4.224244  | -0.025899 |

|   |            |           |           |
|---|------------|-----------|-----------|
| C | 5.594321   | 3.789264  | -0.030497 |
| C | 5.897907   | 2.427430  | -0.029462 |
| C | -5.897720  | 2.429406  | 0.029924  |
| C | -5.593658  | 3.791134  | 0.031345  |
| C | -4.261519  | 4.225665  | 0.026089  |
| C | -3.200762  | 3.306916  | 0.021137  |
| C | -6.074466  | -0.803341 | 0.028031  |
| C | -6.821742  | -0.984732 | -1.157849 |
| C | -7.955027  | -1.802578 | -1.128766 |
| C | -8.373140  | -2.447504 | 0.038426  |
| C | -7.623804  | -2.251132 | 1.201517  |
| C | -6.482081  | -1.444660 | 1.219702  |
| C | -5.721110  | -1.246636 | 2.511321  |
| C | -6.401712  | -0.326869 | -2.453011 |
| C | -9.583422  | -3.351042 | 0.036308  |
| C | 6.074096   | -0.804652 | -0.028103 |
| C | 6.817156   | -0.989725 | 1.159926  |
| C | 7.946900   | -1.812472 | 1.133872  |
| C | 8.368504   | -2.454764 | -0.033584 |
| C | 7.619042   | -2.260811 | -1.196931 |
| C | 6.480828   | -1.449379 | -1.218148 |
| C | 5.718321   | -1.256282 | -2.509607 |
| C | 6.391580   | -0.336690 | 2.455715  |
| C | 9.612457   | -3.311303 | -0.043377 |
| H | -1.182520  | -2.878283 | -0.002970 |
| H | -3.641671  | -2.546485 | 0.005964  |
| H | 3.640176   | -2.547743 | -0.006987 |
| H | 1.180954   | -2.878678 | 0.001609  |
| H | 2.176955   | 3.665772  | -0.023662 |
| H | 4.045688   | 5.288321  | -0.028221 |
| H | 6.397138   | 4.520456  | -0.037699 |
| H | 6.929342   | 2.086945  | -0.041201 |
| H | -6.929279  | 2.089312  | 0.042310  |
| H | -6.396228  | 4.522587  | 0.039389  |
| H | -4.044519  | 5.289667  | 0.028699  |
| H | -2.176345  | 3.666474  | 0.022568  |
| H | -8.523926  | -1.941332 | -2.045616 |
| H | -7.938638  | -2.733399 | 2.124432  |
| H | -4.703542  | -1.646693 | 2.448744  |
| H | -6.227667  | -1.745041 | 3.341952  |
| H | -5.626106  | -0.184235 | 2.760004  |
| H | -7.041141  | -0.649746 | -3.278751 |
| H | -5.366031  | -0.574656 | -2.709015 |
| H | -6.457094  | 0.765090  | -2.391045 |
| H | -9.307458  | -4.383141 | -0.214217 |
| H | -10.324433 | -3.026475 | -0.700403 |
| H | -10.067493 | -3.374311 | 1.017212  |
| H | 8.508499   | -1.959583 | 2.053912  |
| H | 7.929332   | -2.751276 | -2.117062 |
| H | 4.701140   | -1.657029 | -2.445228 |
| H | 6.224783   | -1.756444 | -3.339239 |
| H | 5.622235   | -0.194660 | -2.761161 |
| H | 6.445755   | 0.755507  | 2.396913  |
| H | 7.028819   | -0.660949 | 3.282603  |
| H | 5.355385   | -0.586513 | 2.707671  |
| H | 9.776599   | -3.790175 | 0.926667  |
| H | 9.552704   | -4.095870 | -0.803561 |

|   |           |           |           |
|---|-----------|-----------|-----------|
| H | 10.504821 | -2.712141 | -0.264334 |
| S | -0.000008 | 1.786960  | -0.000946 |

Optimized structure of  $A^T$

| Atom | x         | y         | z         |
|------|-----------|-----------|-----------|
| C    | -0.726769 | -0.765745 | 0.004061  |
| C    | -1.264410 | 0.550010  | 0.008815  |
| C    | 1.263976  | 0.549585  | -0.010586 |
| C    | 0.725895  | -0.765989 | -0.005786 |
| C    | -1.594733 | -1.873987 | 0.005391  |
| C    | -2.972362 | -1.691640 | 0.013074  |
| C    | -3.499191 | -0.387904 | 0.024955  |
| C    | -2.639502 | 0.754512  | 0.018205  |
| C    | 2.639140  | 0.753621  | -0.019774 |
| C    | 3.498458  | -0.389080 | -0.026358 |
| C    | 2.971186  | -1.692646 | -0.014419 |
| C    | 1.593491  | -1.874518 | -0.006880 |
| C    | 3.487444  | 1.945865  | -0.018081 |
| C    | 4.848285  | 1.497076  | -0.017734 |
| C    | 4.870687  | 0.058541  | -0.024487 |
| C    | -4.871280 | 0.060144  | 0.023402  |
| C    | -4.848422 | 1.498684  | 0.017137  |
| C    | -3.487432 | 1.947023  | 0.017001  |
| C    | 3.201246  | 3.305857  | -0.021874 |
| C    | 4.262325  | 4.224244  | -0.025899 |
| C    | 5.594321  | 3.789264  | -0.030497 |
| C    | 5.897907  | 2.427430  | -0.029462 |
| C    | -5.897720 | 2.429406  | 0.029924  |
| C    | -5.593658 | 3.791134  | 0.031345  |
| C    | -4.261519 | 4.225665  | 0.026089  |
| C    | -3.200762 | 3.306916  | 0.021137  |
| C    | -6.074466 | -0.803341 | 0.028031  |
| C    | -6.821742 | -0.984732 | -1.157849 |
| C    | -7.955027 | -1.802578 | -1.128766 |
| C    | -8.373140 | -2.447504 | 0.038426  |
| C    | -7.623804 | -2.251132 | 1.201517  |
| C    | -6.482081 | -1.444660 | 1.219702  |
| C    | -5.721110 | -1.246636 | 2.511321  |
| C    | -6.401712 | -0.326869 | -2.453011 |
| C    | -9.583422 | -3.351042 | 0.036308  |
| C    | 6.074096  | -0.804652 | -0.028103 |
| C    | 6.817156  | -0.989725 | 1.159926  |
| C    | 7.946900  | -1.812472 | 1.133872  |
| C    | 8.368504  | -2.454764 | -0.033584 |
| C    | 7.619042  | -2.260811 | -1.196931 |
| C    | 6.480828  | -1.449379 | -1.218148 |
| C    | 5.718321  | -1.256282 | -2.509607 |
| C    | 6.391580  | -0.336690 | 2.455715  |
| C    | 9.612457  | -3.311303 | -0.043377 |
| H    | -1.182520 | -2.878283 | -0.002970 |
| H    | -3.641671 | -2.546485 | 0.005964  |
| H    | 3.640176  | -2.547743 | -0.006987 |
| H    | 1.180954  | -2.878678 | 0.001609  |
| H    | 2.176955  | 3.665772  | -0.023662 |
| H    | 4.045688  | 5.288321  | -0.028221 |
| H    | 6.397138  | 4.520456  | -0.037699 |
| H    | 6.929342  | 2.086945  | -0.041201 |

|   |            |           |           |
|---|------------|-----------|-----------|
| H | -6.929279  | 2.089312  | 0.042310  |
| H | -6.396228  | 4.522587  | 0.039389  |
| H | -4.044519  | 5.289667  | 0.028699  |
| H | -2.176345  | 3.666474  | 0.022568  |
| H | -8.523926  | -1.941332 | -2.045616 |
| H | -7.938638  | -2.733399 | 2.124432  |
| H | -4.703542  | -1.646693 | 2.448744  |
| H | -6.227667  | -1.745041 | 3.341952  |
| H | -5.626106  | -0.184235 | 2.760004  |
| H | -7.041141  | -0.649746 | -3.278751 |
| H | -5.366031  | -0.574656 | -2.709015 |
| H | -6.457094  | 0.765090  | -2.391045 |
| H | -9.307458  | -4.383141 | -0.214217 |
| H | -10.324433 | -3.026475 | -0.700403 |
| H | -10.067493 | -3.374311 | 1.017212  |
| H | 8.508499   | -1.959583 | 2.053912  |
| H | 7.929332   | -2.751276 | -2.117062 |
| H | 4.701140   | -1.657029 | -2.445228 |
| H | 6.224783   | -1.756444 | -3.339239 |
| H | 5.622235   | -0.194660 | -2.761161 |
| H | 6.445755   | 0.755507  | 2.396913  |
| H | 7.028819   | -0.660949 | 3.282603  |
| H | 5.355385   | -0.586513 | 2.707671  |
| H | 9.776599   | -3.790175 | 0.926667  |
| H | 9.552704   | -4.095870 | -0.803561 |
| H | 10.504821  | -2.712141 | -0.264334 |
| S | -0.000008  | 1.786960  | -0.000946 |

*Optimized structure of TSI*

| Atom | x          | y         | z         |
|------|------------|-----------|-----------|
| C    | -8.340795  | -0.584172 | -1.696891 |
| C    | -8.065571  | 0.188678  | -0.546398 |
| C    | -8.996787  | 1.160066  | -0.114620 |
| C    | -10.177750 | 1.340522  | -0.840516 |
| C    | -10.466954 | 0.588615  | -1.982473 |
| C    | -9.536025  | -0.370468 | -2.390102 |
| C    | -6.809066  | -0.024283 | 0.210321  |
| C    | -5.508612  | 0.434189  | -0.157326 |
| C    | -4.565407  | 0.018746  | 0.843893  |
| C    | -5.304329  | -0.725640 | 1.863844  |
| C    | -6.676771  | -0.739917 | 1.460153  |
| C    | -5.088874  | 1.190101  | -1.274846 |
| C    | -3.754096  | 1.526838  | -1.414210 |
| C    | -2.806115  | 1.125396  | -0.444885 |
| C    | -3.234372  | 0.369189  | 0.686059  |
| C    | -1.388469  | 1.384093  | -0.424967 |
| C    | -0.749255  | 0.822868  | 0.714379  |
| S    | -1.891538  | -0.017928 | 1.770271  |
| C    | 0.620227   | 0.977576  | 0.910163  |
| C    | 1.375079   | 1.692814  | -0.064190 |
| C    | 0.745932   | 2.266548  | -1.182940 |
| C    | -0.620453  | 2.112726  | -1.359326 |
| C    | 1.526013   | 0.580089  | 1.988288  |
| C    | 2.821134   | 1.056301  | 1.661646  |
| C    | 2.794909   | 1.677256  | 0.308084  |
| C    | 3.897673   | 0.809887  | 2.511841  |
| C    | 3.674112   | 0.119489  | 3.707409  |

|    |            |           |           |
|----|------------|-----------|-----------|
| C  | 2.393623   | -0.340861 | 4.037447  |
| C  | 1.313024   | -0.120033 | 3.178733  |
| C  | -7.634135  | -1.398501 | 2.240909  |
| C  | -7.228324  | -2.028881 | 3.419596  |
| C  | -5.885405  | -2.009311 | 3.814706  |
| C  | -4.914319  | -1.359275 | 3.038158  |
| C  | 3.725419   | 2.792770  | -0.097472 |
| C  | 4.351668   | 2.845649  | -1.366672 |
| C  | 5.224537   | 3.900464  | -1.664598 |
| C  | 5.492050   | 4.928602  | -0.764029 |
| C  | 4.806564   | 4.907567  | 0.451694  |
| C  | 3.923711   | 3.881130  | 0.797628  |
| C  | 4.128814   | 1.827292  | -2.466968 |
| C  | 3.164334   | 4.029409  | 2.100166  |
| C  | 6.469804   | 6.030509  | -1.093110 |
| C  | -8.723606  | 2.013855  | 1.103026  |
| C  | -11.735651 | 0.824138  | -2.767555 |
| C  | -7.377369  | -1.649561 | -2.169668 |
| Sn | 3.767474   | -1.420978 | -0.878166 |
| C  | 3.160752   | -2.866142 | 0.676919  |
| C  | 4.271548   | -3.289809 | 1.647745  |
| C  | 3.794422   | -4.298441 | 2.704582  |
| C  | 4.901745   | -4.731292 | 3.670690  |
| C  | 2.717619   | -1.906894 | -2.758644 |
| C  | 3.014415   | -3.316650 | -3.294476 |
| C  | 2.267878   | -3.640015 | -4.599087 |
| C  | 2.563107   | -5.045206 | -5.133018 |
| C  | 5.947844   | -1.550476 | -1.235239 |
| C  | 6.823865   | -0.719580 | -0.286285 |
| C  | 8.327130   | -0.845443 | -0.578306 |
| C  | 9.198990   | -0.015264 | 0.369110  |
| H  | -3.427822  | 2.106119  | -2.272377 |
| H  | -5.817518  | 1.504966  | -2.015759 |
| H  | 1.325442   | 2.843625  | -1.896051 |
| H  | -1.108527  | 2.562167  | -2.218570 |
| H  | 0.326354   | -0.484922 | 3.446054  |
| H  | 2.237235   | -0.874997 | 4.969838  |
| H  | 4.501831   | -0.060368 | 4.387320  |
| H  | 4.892888   | 1.161915  | 2.254688  |
| H  | -8.674504  | -1.419303 | 1.929128  |
| H  | -7.961239  | -2.541853 | 4.035333  |
| H  | -5.588660  | -2.505834 | 4.733737  |
| H  | -3.877303  | -1.360233 | 3.359899  |
| H  | -10.889063 | 2.092047  | -0.504601 |
| H  | -9.746723  | -0.975633 | -3.269277 |
| H  | -6.424963  | -1.219060 | -2.496974 |
| H  | -7.798443  | -2.210477 | -3.008234 |
| H  | -7.142414  | -2.359419 | -1.369520 |
| H  | -9.512060  | 2.758244  | 1.241879  |
| H  | -7.768917  | 2.543010  | 1.012813  |
| H  | -8.663338  | 1.411681  | 2.015736  |
| H  | -11.589612 | 1.593272  | -3.536521 |
| H  | -12.549886 | 1.164272  | -2.120573 |
| H  | -12.065354 | -0.085643 | -3.278158 |
| H  | 5.699462   | 3.917178  | -2.643295 |
| H  | 4.941883   | 5.730524  | 1.150265  |
| H  | 2.121015   | 3.719039  | 2.001467  |

|   |           |           |           |
|---|-----------|-----------|-----------|
| H | 3.174378  | 5.076111  | 2.416640  |
| H | 3.597747  | 3.434294  | 2.909562  |
| H | 4.860454  | 1.012953  | -2.419157 |
| H | 4.253360  | 2.306208  | -3.443026 |
| H | 3.133880  | 1.382142  | -2.441821 |
| H | 6.586613  | 6.153330  | -2.173840 |
| H | 6.148443  | 6.989493  | -0.674825 |
| H | 7.463184  | 5.814787  | -0.679998 |
| H | 3.291602  | 0.416903  | -0.362702 |
| H | 6.219364  | -2.611894 | -1.169280 |
| H | 6.125907  | -1.252631 | -2.275939 |
| H | 1.642659  | -1.785251 | -2.581650 |
| H | 2.996445  | -1.151931 | -3.503217 |
| H | 2.759918  | -3.741140 | 0.148745  |
| H | 2.325169  | -2.423076 | 1.228142  |
| H | 5.113469  | -3.728861 | 1.094018  |
| H | 4.672205  | -2.406763 | 2.162610  |
| H | 2.964803  | -3.853413 | 3.269709  |
| H | 3.380171  | -5.181719 | 2.199519  |
| H | 4.531096  | -5.446566 | 4.412386  |
| H | 5.731494  | -5.207961 | 3.136053  |
| H | 5.311396  | -3.871935 | 4.213925  |
| H | 4.093517  | -3.435382 | -3.467485 |
| H | 2.746640  | -4.070993 | -2.541097 |
| H | 1.188489  | -3.528388 | -4.430128 |
| H | 2.535027  | -2.892887 | -5.358631 |
| H | 2.017681  | -5.244048 | -6.061379 |
| H | 3.631408  | -5.174271 | -5.341474 |
| H | 2.274120  | -5.814022 | -4.407312 |
| H | 6.538791  | 0.340069  | -0.344807 |
| H | 6.639446  | -1.021458 | 0.754018  |
| H | 8.618118  | -1.902846 | -0.515595 |
| H | 8.517414  | -0.540158 | -1.616337 |
| H | 10.263017 | -0.123922 | 0.134669  |
| H | 8.951200  | 1.050347  | 0.303879  |
| H | 9.055934  | -0.323229 | 1.411270  |

*Optimized structure of B*

| Atom | x         | y         | z         |
|------|-----------|-----------|-----------|
| S    | 0.063511  | 1.746695  | 0.134676  |
| C    | -1.222297 | 0.534595  | 0.192305  |
| C    | -0.713263 | -0.774740 | 0.414081  |
| C    | 0.732176  | -0.785958 | 0.539822  |
| C    | 1.294664  | 0.508029  | 0.410460  |
| C    | -2.586647 | 0.750683  | 0.046608  |
| C    | -3.469195 | -0.374505 | 0.124935  |
| C    | -2.967698 | -1.674230 | 0.337430  |
| C    | -1.601719 | -1.866961 | 0.482728  |
| C    | 1.576595  | -1.888717 | 0.759164  |
| C    | 2.954307  | -1.711886 | 0.856129  |
| C    | 3.494326  | -0.431681 | 0.726755  |
| C    | 2.677579  | 0.694350  | 0.497613  |
| C    | -3.405442 | 1.940186  | -0.191512 |
| C    | -4.768240 | 1.506990  | -0.257620 |
| C    | -4.819000 | 0.078170  | -0.062405 |
| C    | 4.950979  | -0.004220 | 0.861830  |
| C    | 4.874507  | 1.483138  | 0.538577  |

|   |            |           |           |
|---|------------|-----------|-----------|
| C | 3.530152   | 1.883605  | 0.380028  |
| C | 5.906067   | 2.408733  | 0.448373  |
| C | 5.593247   | 3.749977  | 0.199357  |
| C | 4.262609   | 4.152458  | 0.050247  |
| C | 3.221188   | 3.225726  | 0.139189  |
| C | -3.092389  | 3.285954  | -0.341375 |
| C | -4.130383  | 4.205644  | -0.556662 |
| C | -5.464838  | 3.785719  | -0.617187 |
| C | -5.794738  | 2.437289  | -0.465875 |
| C | 6.005262   | -0.836755 | 0.135793  |
| C | 7.013860   | -1.484478 | 0.883627  |
| C | 7.981618   | -2.249626 | 0.221103  |
| C | 7.988281   | -2.395798 | -1.165532 |
| C | 6.982199   | -1.751619 | -1.889332 |
| C | 5.995033   | -0.977576 | -1.272425 |
| C | -6.037309  | -0.764822 | -0.054961 |
| C | -6.671727  | -1.104196 | -1.271290 |
| C | -7.821827  | -1.898221 | -1.239857 |
| C | -8.364864  | -2.367669 | -0.040811 |
| C | -7.725813  | -2.016572 | 1.151344  |
| C | -6.572228  | -1.227070 | 1.168655  |
| C | -6.113923  | -0.639190 | -2.597590 |
| C | -9.590546  | -3.250250 | -0.035311 |
| C | -5.932318  | -0.858250 | 2.488175  |
| C | 7.096080   | -1.389788 | 2.395121  |
| C | 9.057279   | -3.200946 | -1.865298 |
| C | 4.947794   | -0.322658 | -2.144193 |
| H | -1.210643  | -2.866223 | 0.647575  |
| H | -3.651547  | -2.516374 | 0.382409  |
| H | 3.605645   | -2.565524 | 1.018442  |
| H | 1.150429   | -2.882969 | 0.852230  |
| H | 2.193822   | 3.552866  | 0.016179  |
| H | 4.034706   | 5.196942  | -0.140970 |
| H | 6.390228   | 4.483573  | 0.120467  |
| H | 6.940269   | 2.094183  | 0.557943  |
| H | -6.829820  | 2.110056  | -0.504693 |
| H | -6.250536  | 4.517263  | -0.780947 |
| H | -3.893187  | 5.258674  | -0.675256 |
| H | -2.065146  | 3.634104  | -0.292838 |
| H | -8.303767  | -2.158848 | -2.179715 |
| H | -8.138776  | -2.360738 | 2.097140  |
| H | -4.925767  | -1.279381 | 2.582879  |
| H | -6.530257  | -1.224769 | 3.326713  |
| H | -5.829701  | 0.227095  | 2.592980  |
| H | -6.685832  | -1.058887 | -3.429309 |
| H | -5.068055  | -0.941222 | -2.718410 |
| H | -6.137929  | 0.451886  | -2.688228 |
| H | -9.316159  | -4.310683 | -0.101367 |
| H | -10.245272 | -3.031982 | -0.884335 |
| H | -10.171622 | -3.122929 | 0.882988  |
| H | 8.750374   | -2.744738 | 0.810139  |
| H | 6.960298   | -1.853415 | -2.972263 |
| H | 3.940310   | -0.674707 | -1.902244 |
| H | 5.135267   | -0.544001 | -3.198059 |
| H | 4.942793   | 0.764973  | -2.025589 |
| H | 7.224466   | -0.357806 | 2.741616  |
| H | 7.949463   | -1.963375 | 2.765507  |

|   |          |           |           |
|---|----------|-----------|-----------|
| H | 6.200698 | -1.786762 | 2.887410  |
| H | 9.534673 | -3.910649 | -1.183472 |
| H | 8.645958 | -3.765257 | -2.708300 |
| H | 9.845471 | -2.551467 | -2.266299 |
| H | 5.176574 | -0.063199 | 1.933560  |

*Optimized structure of TS2<sup>m</sup>*

| Atom | x         | y         | z         |
|------|-----------|-----------|-----------|
| C    | -3.593262 | -4.115660 | 0.644003  |
| C    | -4.074591 | -2.781828 | 0.520646  |
| C    | -5.444927 | -2.589407 | 0.218801  |
| C    | -6.258750 | -3.698683 | -0.044865 |
| C    | -5.779845 | -5.005985 | -0.004465 |
| C    | -4.446739 | -5.186967 | 0.367042  |
| C    | -3.130515 | -1.641871 | 0.800905  |
| C    | -1.749932 | -1.594023 | 0.264329  |
| C    | -0.922164 | -0.873465 | 1.160748  |
| C    | -1.714362 | -0.527947 | 2.340967  |
| C    | -3.027847 | -1.038477 | 2.146630  |
| C    | -1.263344 | -2.036530 | -0.973361 |
| C    | 0.062875  | -1.797296 | -1.317212 |
| C    | 0.913826  | -1.100929 | -0.438428 |
| C    | 0.407692  | -0.638688 | 0.800246  |
| S    | 1.636644  | 0.207831  | 1.747064  |
| C    | 2.843956  | -0.049174 | 0.481756  |
| C    | 2.316115  | -0.761659 | -0.621811 |
| C    | 4.182049  | 0.358989  | 0.491854  |
| C    | 4.985905  | 0.053253  | -0.624388 |
| C    | 4.478639  | -0.647712 | -1.718897 |
| C    | 3.147394  | -1.057479 | -1.715381 |
| C    | 4.996763  | 1.071338  | 1.483609  |
| C    | 6.305567  | 1.202493  | 0.970885  |
| C    | 6.378658  | 0.646582  | -0.446268 |
| C    | 7.301400  | 1.819685  | 1.716761  |
| C    | 6.988064  | 2.314295  | 2.988028  |
| C    | 5.691080  | 2.194365  | 3.496163  |
| C    | 4.685813  | 1.573683  | 2.750809  |
| C    | -3.986911 | -0.911396 | 3.153545  |
| C    | -3.645193 | -0.253583 | 4.337835  |
| C    | -2.359414 | 0.270529  | 4.519024  |
| C    | -1.384971 | 0.132971  | 3.526367  |
| C    | 7.575759  | -0.231348 | -0.804194 |
| C    | 8.466635  | 0.188979  | -1.816977 |
| C    | 9.567811  | -0.611617 | -2.144841 |
| C    | 9.819598  | -1.823444 | -1.502848 |
| C    | 8.931325  | -2.222245 | -0.501387 |
| C    | 7.818652  | -1.457115 | -0.139742 |
| C    | 8.284351  | 1.490024  | -2.574831 |
| C    | 6.916827  | -1.976514 | 0.956849  |
| C    | 10.996207 | -2.687613 | -1.889574 |
| C    | -6.117465 | -1.233219 | 0.165133  |
| C    | -6.667632 | -6.181195 | -0.334976 |
| C    | -2.199589 | -4.448745 | 1.136115  |
| Sn   | -3.696110 | 1.201713  | -1.097829 |
| C    | -5.204334 | 2.578413  | -0.249915 |
| C    | -5.069465 | 2.877916  | 1.250330  |
| C    | -6.163731 | 3.816589  | 1.782007  |



|   |           |           |           |
|---|-----------|-----------|-----------|
| C | -6.024599 | 4.120762  | 3.277075  |
| C | -1.729168 | 2.186583  | -1.262121 |
| C | -1.316016 | 3.070599  | -0.077551 |
| C | 0.062864  | 3.722902  | -0.264486 |
| C | 0.475000  | 4.611240  | 0.913353  |
| C | -4.339657 | 0.633257  | -3.134362 |
| C | -4.554691 | 1.825119  | -4.080731 |
| C | -4.987162 | 1.408090  | -5.495877 |
| C | -5.202027 | 2.596334  | -6.438611 |
| H | 2.749000  | -1.609899 | -2.561066 |
| H | 5.121383  | -0.883608 | -2.561886 |
| H | -1.917424 | -2.574865 | -1.653066 |
| H | 0.446531  | -2.150835 | -2.269574 |
| H | -0.386199 | 0.524900  | 3.691070  |
| H | -2.111855 | 0.779792  | 5.445619  |
| H | -4.382657 | -0.153272 | 5.128815  |
| H | -4.978929 | -1.333674 | 3.025721  |
| H | 8.310724  | 1.906612  | 1.323998  |
| H | 7.758470  | 2.793945  | 3.584680  |
| H | 5.461939  | 2.584347  | 4.483532  |
| H | 3.685206  | 1.483961  | 3.161156  |
| H | 9.107650  | -3.160389 | 0.020547  |
| H | 10.246775 | -0.273457 | -2.924436 |
| H | 7.336386  | 1.522794  | -3.124321 |
| H | 9.086156  | 1.618694  | -3.306300 |
| H | 8.304955  | 2.364302  | -1.914029 |
| H | 7.299206  | -2.922113 | 1.349849  |
| H | 5.898742  | -2.151164 | 0.595574  |
| H | 6.842981  | -1.271915 | 1.790549  |
| H | 11.451383 | -3.159736 | -1.013097 |
| H | 11.769090 | -2.106221 | -2.400586 |
| H | 10.691186 | -3.494232 | -2.567990 |
| H | -7.306639 | -3.526147 | -0.281044 |
| H | -4.058224 | -6.197914 | 0.470153  |
| H | -1.443220 | -4.355102 | 0.351014  |
| H | -2.172382 | -5.479321 | 1.500871  |
| H | -1.889747 | -3.794967 | 1.955469  |
| H | -5.699586 | -0.521234 | 0.877443  |
| H | -7.183758 | -1.339485 | 0.386216  |
| H | -6.043834 | -0.785472 | -0.832464 |
| H | -7.723815 | -5.941725 | -0.180351 |
| H | -6.551700 | -6.482539 | -1.383700 |
| H | -6.423355 | -7.053266 | 0.279610  |
| H | -3.580305 | -0.418535 | -0.019414 |
| H | -5.145309 | 3.509558  | -0.828593 |
| H | -6.189738 | 2.146761  | -0.464221 |
| H | -3.579064 | -0.042997 | -3.542455 |
| H | -5.261785 | 0.045353  | -3.053249 |
| H | -1.760897 | 2.780548  | -2.185432 |
| H | -0.987264 | 1.397485  | -1.426101 |
| H | -2.062369 | 3.861973  | 0.079782  |
| H | -1.304041 | 2.478077  | 0.847041  |
| H | 0.813474  | 2.935132  | -0.409697 |
| H | 0.057675  | 4.315660  | -1.189722 |
| H | 1.458055  | 5.064611  | 0.748903  |
| H | -0.244170 | 5.423842  | 1.069620  |
| H | 0.528100  | 4.032986  | 1.842595  |

|   |           |          |           |
|---|-----------|----------|-----------|
| H | -5.313711 | 2.503361 | -3.665965 |
| H | -3.632160 | 2.418065 | -4.156276 |
| H | -4.228772 | 0.734742 | -5.917603 |
| H | -5.911700 | 0.818861 | -5.428274 |
| H | -5.508874 | 2.266334 | -7.436557 |
| H | -5.979031 | 3.269188 | -6.058026 |
| H | -4.283972 | 3.184373 | -6.551212 |
| H | -5.092829 | 1.943495 | 1.827507  |
| H | -4.088148 | 3.325601 | 1.456693  |
| H | -6.141628 | 4.755259 | 1.211557  |
| H | -7.147461 | 3.367674 | 1.587208  |
| H | -6.821320 | 4.784928 | 3.628146  |
| H | -6.069016 | 3.202447 | 3.873597  |
| H | -5.066642 | 4.606642 | 3.494654  |
| H | 6.412538  | 1.521795 | -1.106314 |

*Optimized structure of TS2'*

| Atom | x         | y         | z         |
|------|-----------|-----------|-----------|
| C    | -4.301607 | -3.098041 | -2.304332 |
| C    | -4.516963 | -1.993130 | -1.433265 |
| C    | -5.798119 | -1.389396 | -1.420989 |
| C    | -6.777221 | -1.823415 | -2.323918 |
| C    | -6.552388 | -2.851929 | -3.235890 |
| C    | -5.311499 | -3.488961 | -3.187584 |
| C    | -3.406267 | -1.573588 | -0.506213 |
| C    | -2.000009 | -1.431766 | -0.951716 |
| C    | -1.133049 | -1.706769 | 0.134923  |
| C    | -1.945365 | -2.132030 | 1.274741  |
| C    | -3.308943 | -2.103753 | 0.870360  |
| C    | -1.499878 | -0.975917 | -2.179101 |
| C    | -0.128095 | -0.822341 | -2.349399 |
| C    | 0.758566  | -1.105535 | -1.293485 |
| C    | 0.242790  | -1.544223 | -0.050230 |
| S    | 1.521251  | -1.839645 | 1.133672  |
| C    | 2.763561  | -1.371916 | -0.033568 |
| C    | 2.209578  | -1.006996 | -1.284211 |
| C    | 4.147005  | -1.333989 | 0.170874  |
| C    | 4.973274  | -0.935273 | -0.898683 |
| C    | 4.440896  | -0.573388 | -2.136507 |
| C    | 3.061500  | -0.605896 | -2.327187 |
| C    | 4.987777  | -1.623388 | 1.338810  |
| C    | 6.335358  | -1.401411 | 0.981381  |
| C    | 6.439649  | -1.034490 | -0.494053 |
| C    | 7.353694  | -1.576178 | 1.909514  |
| C    | 7.024744  | -1.978738 | 3.209004  |
| C    | 5.692208  | -2.207609 | 3.565010  |
| C    | 4.663910  | -2.032957 | 2.635797  |
| C    | -4.310119 | -2.529945 | 1.745523  |
| C    | -3.955027 | -2.956080 | 3.027858  |
| C    | -2.614991 | -2.960396 | 3.434146  |
| C    | -1.601914 | -2.554339 | 2.560884  |
| C    | 7.360820  | 0.121954  | -0.876006 |
| C    | 7.138930  | 1.434149  | -0.394309 |
| C    | 8.010373  | 2.458803  | -0.774864 |
| C    | 9.102345  | 2.237418  | -1.617297 |
| C    | 9.304494  | 0.939841  | -2.085707 |
| C    | 8.458663  | -0.118747 | -1.732032 |

|    |           |           |           |
|----|-----------|-----------|-----------|
| C  | 5.985175  | 1.776603  | 0.520636  |
| C  | 8.766451  | -1.492300 | -2.296822 |
| C  | 10.041693 | 3.360977  | -1.986079 |
| C  | -6.202381 | -0.280977 | -0.470989 |
| C  | -7.610388 | -3.271321 | -4.227488 |
| C  | -3.039465 | -3.935794 | -2.279479 |
| Sn | -3.276021 | 1.827969  | 0.146854  |
| C  | -4.551453 | 2.472637  | 1.833953  |
| C  | -4.468905 | 1.611485  | 3.102943  |
| C  | -5.404705 | 2.091272  | 4.223359  |
| C  | -5.316243 | 1.236168  | 5.491466  |
| C  | -1.149842 | 2.255667  | 0.549756  |
| C  | -0.665512 | 1.984613  | 1.980599  |
| C  | 0.822767  | 2.308925  | 2.184320  |
| C  | 1.308169  | 2.044317  | 3.612839  |
| C  | -3.866282 | 2.975743  | -1.647617 |
| C  | -3.764870 | 4.499967  | -1.477687 |
| C  | -4.165431 | 5.281175  | -2.739773 |
| C  | -4.063893 | 6.800253  | -2.569625 |
| H  | 2.640952  | -0.319075 | -3.286320 |
| H  | 5.097127  | -0.256433 | -2.941674 |
| H  | -2.181699 | -0.756742 | -2.995618 |
| H  | 0.263381  | -0.482641 | -3.303611 |
| H  | -0.565830 | -2.585149 | 2.883153  |
| H  | -2.357520 | -3.293883 | 4.434998  |
| H  | -4.725761 | -3.293760 | 3.714524  |
| H  | -5.348264 | -2.547373 | 1.428165  |
| H  | 8.388445  | -1.391908 | 1.634008  |
| H  | 7.810431  | -2.113424 | 3.946664  |
| H  | 5.451894  | -2.521106 | 4.576670  |
| H  | 3.634053  | -2.209505 | 2.928838  |
| H  | 10.144078 | 0.739825  | -2.747663 |
| H  | 7.825814  | 3.463060  | -0.399312 |
| H  | 5.019104  | 1.562524  | 0.053435  |
| H  | 6.004424  | 2.838695  | 0.778311  |
| H  | 6.022612  | 1.204465  | 1.452513  |
| H  | 9.654943  | -1.451123 | -2.931945 |
| H  | 7.947183  | -1.884225 | -2.910635 |
| H  | 8.963571  | -2.231190 | -1.511504 |
| H  | 10.767941 | 3.550868  | -1.185842 |
| H  | 9.499428  | 4.296534  | -2.156517 |
| H  | 10.608078 | 3.128066  | -2.892403 |
| H  | -7.751801 | -1.340412 | -2.300832 |
| H  | -5.125987 | -4.337561 | -3.842596 |
| H  | -2.215297 | -3.470422 | -2.828510 |
| H  | -3.233061 | -4.910342 | -2.736266 |
| H  | -2.684841 | -4.108006 | -1.259987 |
| H  | -5.720062 | -0.357438 | 0.503936  |
| H  | -7.284439 | -0.306672 | -0.310816 |
| H  | -5.966126 | 0.707650  | -0.880741 |
| H  | -8.613741 | -3.012365 | -3.876766 |
| H  | -7.465075 | -2.775031 | -5.195300 |
| H  | -7.582402 | -4.349911 | -4.411188 |
| H  | -3.552175 | -0.068189 | -0.215760 |
| H  | -4.276802 | 3.510845  | 2.062165  |
| H  | -5.582974 | 2.503578  | 1.462061  |
| H  | -3.229396 | 2.642935  | -2.475840 |

|   |           |           |           |
|---|-----------|-----------|-----------|
| H | -4.891532 | 2.693708  | -1.915659 |
| H | -0.996851 | 3.312161  | 0.291633  |
| H | -0.563073 | 1.672669  | -0.168377 |
| H | -1.256157 | 2.573999  | 2.695973  |
| H | -0.836574 | 0.931815  | 2.242230  |
| H | 1.417381  | 1.713862  | 1.478989  |
| H | 1.000357  | 3.361371  | 1.923074  |
| H | 2.369476  | 2.288172  | 3.727362  |
| H | 0.748634  | 2.643608  | 4.340663  |
| H | 1.179378  | 0.990251  | 3.883100  |
| H | -4.400182 | 4.829082  | -0.643275 |
| H | -2.738591 | 4.781225  | -1.201983 |
| H | -3.529575 | 4.960108  | -3.575834 |
| H | -5.192524 | 5.008902  | -3.018115 |
| H | -4.355570 | 7.326789  | -3.484302 |
| H | -4.714766 | 7.153301  | -1.761518 |
| H | -3.039942 | 7.104243  | -2.323873 |
| H | -4.705445 | 0.564904  | 2.867388  |
| H | -3.438554 | 1.601070  | 3.482838  |
| H | -5.169377 | 3.136458  | 4.466706  |
| H | -6.438552 | 2.092981  | 3.851384  |
| H | -5.999101 | 1.596537  | 6.267984  |
| H | -5.570772 | 0.190891  | 5.282399  |
| H | -4.302544 | 1.249395  | 5.907815  |
| H | 6.823893  | -1.931055 | -0.995369 |

*Optimized structure of C<sup>m</sup>*

| Atom | x         | y         | z         |
|------|-----------|-----------|-----------|
| C    | 3.641106  | -4.720390 | -1.031141 |
| C    | 4.177542  | -3.413560 | -0.945907 |
| C    | 5.367169  | -3.111787 | -1.645848 |
| C    | 5.991303  | -4.107273 | -2.407783 |
| C    | 5.478097  | -5.400453 | -2.500113 |
| C    | 4.300020  | -5.680940 | -1.804028 |
| C    | 3.497329  | -2.324577 | -0.119718 |
| C    | 2.081029  | -1.919093 | -0.510579 |
| C    | 1.277212  | -1.793131 | 0.639885  |
| C    | 2.064302  | -2.186436 | 1.814789  |
| C    | 3.357032  | -2.552291 | 1.380392  |
| C    | 1.583998  | -1.635161 | -1.783192 |
| C    | 0.264132  | -1.211567 | -1.926289 |
| C    | -0.559965 | -1.063007 | -0.797916 |
| C    | -0.044580 | -1.359028 | 0.486155  |
| S    | -1.246196 | -1.115718 | 1.758908  |
| C    | -2.453822 | -0.605159 | 0.573840  |
| C    | -1.947620 | -0.625892 | -0.746982 |
| C    | -3.774080 | -0.214424 | 0.824277  |
| C    | -4.579279 | 0.167611  | -0.266812 |
| C    | -4.092313 | 0.153510  | -1.574235 |
| C    | -2.779549 | -0.246825 | -1.813982 |
| C    | -4.566799 | -0.121362 | 2.056133  |
| C    | -5.863905 | 0.320452  | 1.716419  |
| C    | -5.946731 | 0.626740  | 0.225864  |
| C    | -6.839517 | 0.474378  | 2.692858  |
| C    | -6.517228 | 0.186848  | 4.024133  |
| C    | -5.231301 | -0.242336 | 4.366290  |
| C    | -4.246440 | -0.399886 | 3.388286  |

|    |            |           |           |
|----|------------|-----------|-----------|
| C  | 4.312061   | -2.992969 | 2.287734  |
| C  | 3.974705   | -3.068432 | 3.644272  |
| C  | 2.697974   | -2.699507 | 4.079802  |
| C  | 1.733267   | -2.255992 | 3.171731  |
| C  | -7.176898  | 0.136787  | -0.534437 |
| C  | -8.035662  | 1.078026  | -1.144929 |
| C  | -9.166600  | 0.632404  | -1.840172 |
| C  | -9.479271  | -0.721529 | -1.955317 |
| C  | -8.622126  | -1.638381 | -1.342335 |
| C  | -7.481627  | -1.241354 | -0.638169 |
| C  | -7.787006  | 2.572664  | -1.077299 |
| C  | -6.617000  | -2.311203 | -0.010915 |
| C  | -10.687514 | -1.185060 | -2.733763 |
| C  | 6.008060   | -1.737719 | -1.610131 |
| C  | 6.181182   | -6.468791 | -3.303286 |
| C  | 2.370587   | -5.122207 | -0.316981 |
| C  | 1.305718   | 2.806052  | -2.001652 |
| C  | 0.313242   | 3.842781  | -1.451989 |
| C  | -1.018260  | 3.872690  | -2.221814 |
| C  | -2.002555  | 4.916200  | -1.683711 |
| Sn | 3.213715   | 2.708503  | -0.866962 |
| C  | 2.700682   | 2.398555  | 1.276230  |
| C  | 3.821667   | 1.848308  | 2.166568  |
| C  | 3.408936   | 1.698338  | 3.639212  |
| C  | 4.525266   | 1.137397  | 4.525901  |
| C  | 4.207388   | 4.690831  | -1.076838 |
| C  | 5.529580   | 4.854497  | -0.318067 |
| C  | 6.159305   | 6.247192  | -0.481394 |
| C  | 7.480822   | 6.407368  | 0.276953  |
| H  | -2.397494  | -0.269157 | -2.830111 |
| H  | -4.736530  | 0.439545  | -2.400315 |
| H  | 2.217602   | -1.756556 | -2.656652 |
| H  | -0.131079  | -0.997300 | -2.914632 |
| H  | 0.744636   | -1.980305 | 3.524251  |
| H  | 2.450645   | -2.762700 | 5.135316  |
| H  | 4.708992   | -3.418901 | 4.363629  |
| H  | 5.301385   | -3.286449 | 1.947838  |
| H  | -7.840427  | 0.801781  | 2.425451  |
| H  | -7.272025  | 0.297113  | 4.797229  |
| H  | -4.995083  | -0.459983 | 5.403732  |
| H  | -3.254444  | -0.738679 | 3.669076  |
| H  | -8.845970  | -2.700834 | -1.410780 |
| H  | -9.820225  | 1.368705  | -2.302465 |
| H  | -6.831437  | 2.857299  | -1.532844 |
| H  | -8.572839  | 3.112721  | -1.611385 |
| H  | -7.778240  | 2.947943  | -0.047456 |
| H  | -7.044989  | -3.301135 | -0.188827 |
| H  | -5.603095  | -2.305914 | -0.422662 |
| H  | -6.522815  | -2.175702 | 1.070640  |
| H  | -10.409356 | -1.506570 | -3.745274 |
| H  | -11.174004 | -2.036966 | -2.248106 |
| H  | -11.427649 | -0.386331 | -2.837217 |
| H  | 6.904853   | -3.859876 | -2.943765 |
| H  | 3.874683   | -6.680544 | -1.863040 |
| H  | 1.513277   | -4.528270 | -0.648257 |
| H  | 2.142031   | -6.174133 | -0.506719 |
| H  | 2.453003   | -4.987108 | 0.765692  |

|   |           |           |           |
|---|-----------|-----------|-----------|
| H | 6.299454  | -1.440790 | -0.595978 |
| H | 6.912933  | -1.724870 | -2.222925 |
| H | 5.343824  | -0.955471 | -1.995837 |
| H | 6.847470  | -6.032470 | -4.053060 |
| H | 5.466190  | -7.116111 | -3.821011 |
| H | 6.791555  | -7.113638 | -2.658684 |
| H | 4.101690  | -1.415251 | -0.225000 |
| H | 3.473247  | 5.431408  | -0.731125 |
| H | 4.353451  | 4.872898  | -2.147947 |
| H | 0.865704  | 1.803206  | -1.978606 |
| H | 1.548254  | 3.022397  | -3.048677 |
| H | 2.360322  | 3.374574  | 1.647434  |
| H | 1.831910  | 1.730709  | 1.298100  |
| H | 4.704832  | 2.500521  | 2.111319  |
| H | 4.148888  | 0.868686  | 1.791710  |
| H | 2.530976  | 1.041882  | 3.698082  |
| H | 3.087302  | 2.676322  | 4.022975  |
| H | 4.206622  | 1.061831  | 5.570999  |
| H | 5.415628  | 1.776527  | 4.496442  |
| H | 4.822479  | 0.135455  | 4.197230  |
| H | 0.760612  | 4.846396  | -1.481157 |
| H | 0.101525  | 3.637355  | -0.393613 |
| H | -1.478069 | 2.876467  | -2.178349 |
| H | -0.814150 | 4.070736  | -3.282945 |
| H | -2.939760 | 4.913342  | -2.250385 |
| H | -1.582242 | 5.926816  | -1.743069 |
| H | -2.249009 | 4.722937  | -0.633480 |
| H | 6.252193  | 4.098393  | -0.656032 |
| H | 5.375116  | 4.662029  | 0.752973  |
| H | 5.443712  | 7.007006  | -0.138915 |
| H | 6.321250  | 6.443970  | -1.549955 |
| H | 7.903529  | 7.408343  | 0.141249  |
| H | 8.226686  | 5.682393  | -0.068779 |
| H | 7.342335  | 6.248639  | 1.352595  |
| H | -5.934885 | 1.720595  | 0.147669  |

*Optimized structure of C<sup>r</sup>*

| Atom | x         | y         | z         |
|------|-----------|-----------|-----------|
| C    | 8.045789  | -0.690339 | -1.443754 |
| C    | 6.944396  | -0.378069 | -0.615732 |
| C    | 6.748673  | 0.962840  | -0.207856 |
| C    | 7.646654  | 1.945562  | -0.634783 |
| C    | 8.737843  | 1.654871  | -1.456806 |
| C    | 8.918621  | 0.328140  | -1.845901 |
| C    | 5.995702  | -1.491502 | -0.177789 |
| C    | 4.535436  | -1.385062 | -0.602326 |
| C    | 3.691608  | -1.706656 | 0.479038  |
| C    | 4.515228  | -1.947465 | 1.669914  |
| C    | 5.870379  | -1.773525 | 1.314484  |
| C    | 4.022525  | -1.082877 | -1.864186 |
| C    | 2.644457  | -1.101781 | -2.068117 |
| C    | 1.775818  | -1.428526 | -1.013176 |
| C    | 2.309287  | -1.729450 | 0.262035  |
| C    | 0.322031  | -1.502411 | -1.033026 |
| C    | -0.213387 | -1.853104 | 0.228888  |
| S    | 1.047186  | -2.099451 | 1.442519  |
| C    | -1.596388 | -1.976326 | 0.406080  |

|    |           |           |           |
|----|-----------|-----------|-----------|
| C  | -2.439304 | -1.734314 | -0.696854 |
| C  | -1.924432 | -1.390180 | -1.947360 |
| C  | -0.545486 | -1.278666 | -2.115490 |
| C  | -2.421715 | -2.340238 | 1.564104  |
| C  | -3.776563 | -2.319319 | 1.167180  |
| C  | -3.900004 | -1.845388 | -0.275790 |
| C  | -4.783977 | -2.649558 | 2.064756  |
| C  | -4.436619 | -3.002890 | 3.374025  |
| C  | -3.096529 | -3.016848 | 3.773627  |
| C  | -2.079051 | -2.686489 | 2.875003  |
| C  | 6.876344  | -1.917836 | 2.261184  |
| C  | 6.527080  | -2.241204 | 3.577350  |
| C  | 5.186825  | -2.422694 | 3.931808  |
| C  | 4.170932  | -2.278337 | 2.983991  |
| C  | -4.849267 | -2.607956 | -1.197106 |
| C  | -4.647649 | -3.976017 | -1.497920 |
| C  | -5.544405 | -4.628353 | -2.349107 |
| C  | -6.642188 | -3.978596 | -2.918058 |
| C  | -6.824439 | -2.630144 | -2.613575 |
| C  | -5.953484 | -1.934519 | -1.765875 |
| C  | -3.488786 | -4.766664 | -0.934373 |
| C  | -6.242697 | -0.470327 | -1.496540 |
| C  | -7.609047 | -4.719630 | -3.810687 |
| C  | 5.599297  | 1.378958  | 0.681654  |
| C  | 9.672573  | 2.744739  | -1.924965 |
| C  | 8.332834  | -2.100988 | -1.921284 |
| C  | -0.690118 | 2.842870  | -1.747908 |
| Sn | -2.523328 | 3.040666  | -0.508423 |
| C  | -3.013850 | 5.210137  | -0.394753 |
| C  | -4.230772 | 5.571099  | 0.465226  |
| C  | -4.510529 | 7.081410  | 0.523845  |
| C  | -5.727564 | 7.439577  | 1.382735  |
| C  | 0.528534  | 3.579310  | -1.169759 |
| C  | 1.802171  | 3.395205  | -2.012585 |
| C  | 3.013043  | 4.145018  | -1.448023 |
| C  | -2.028173 | 2.318254  | 1.537737  |
| C  | -3.219220 | 1.939445  | 2.426749  |
| C  | -2.805543 | 1.488584  | 3.836427  |
| C  | -3.994763 | 1.096334  | 4.719051  |
| H  | 2.238849  | -0.864464 | -3.046979 |
| H  | 4.692621  | -0.824047 | -2.678579 |
| H  | -2.593189 | -1.224630 | -2.786673 |
| H  | -0.138367 | -1.021235 | -3.088585 |
| H  | -1.043370 | -2.709103 | 3.198274  |
| H  | -2.842022 | -3.292262 | 4.792776  |
| H  | -5.213426 | -3.270843 | 4.084130  |
| H  | -5.824327 | -2.645813 | 1.751576  |
| H  | 7.917231  | -1.770463 | 1.986650  |
| H  | 7.302994  | -2.351100 | 4.329306  |
| H  | 4.930838  | -2.675066 | 4.956616  |
| H  | 3.135028  | -2.417805 | 3.275756  |
| H  | 9.763900  | 0.072236  | -2.480812 |
| H  | 7.485620  | 2.971552  | -0.310830 |
| H  | 4.630776  | 1.160143  | 0.221610  |
| H  | 5.640199  | 2.453001  | 0.880532  |
| H  | 5.620572  | 0.858371  | 1.643788  |
| H  | 9.230643  | -2.115426 | -2.544329 |

|   |           |           |           |
|---|-----------|-----------|-----------|
| H | 7.514220  | -2.512065 | -2.523396 |
| H | 8.503401  | -2.795835 | -1.090856 |
| H | 9.257970  | 3.280281  | -2.788228 |
| H | 10.641710 | 2.338095  | -2.228196 |
| H | 9.847195  | 3.487020  | -1.139668 |
| H | -7.668501 | -2.098158 | -3.046717 |
| H | -5.375491 | -5.679317 | -2.573947 |
| H | -2.525024 | -4.353575 | -1.247578 |
| H | -3.533743 | -5.804797 | -1.273564 |
| H | -3.493637 | -4.770958 | 0.159738  |
| H | -6.421070 | -0.270277 | -0.433629 |
| H | -7.137097 | -0.153992 | -2.039183 |
| H | -5.422355 | 0.184354  | -1.813459 |
| H | -8.171524 | -4.032355 | -4.449254 |
| H | -7.089884 | -5.434547 | -4.456907 |
| H | -8.338215 | -5.288963 | -3.220699 |
| H | -4.267599 | -0.813628 | -0.217626 |
| H | -2.111278 | 5.701407  | -0.006275 |
| H | -3.147923 | 5.570599  | -1.421333 |
| H | -0.482455 | 1.771564  | -1.843484 |
| H | -0.921407 | 3.212508  | -2.753697 |
| H | -1.440588 | 3.119681  | 2.005412  |
| H | -1.354998 | 1.462145  | 1.414760  |
| H | -3.911725 | 2.788556  | 2.515840  |
| H | -3.795483 | 1.131715  | 1.954457  |
| H | -2.117716 | 0.637263  | 3.751092  |
| H | -2.236881 | 2.295678  | 4.318489  |
| H | -3.668551 | 0.800065  | 5.721652  |
| H | -4.698214 | 1.929681  | 4.832211  |
| H | -4.543608 | 0.252314  | 4.287005  |
| H | 0.314014  | 4.653885  | -1.083793 |
| H | 0.730860  | 3.229306  | -0.148058 |
| H | 2.032507  | 2.323676  | -2.081810 |
| H | 1.604580  | 3.733259  | -3.038999 |
| H | 3.903822  | 3.991246  | -2.066015 |
| H | 2.824363  | 5.223712  | -1.398135 |
| H | 3.251010  | 3.804495  | -0.433853 |
| H | -5.125638 | 5.060704  | 0.082121  |
| H | -4.090741 | 5.199239  | 1.489962  |
| H | -3.621291 | 7.596278  | 0.912230  |
| H | -4.656385 | 7.458418  | -0.497600 |
| H | -5.900361 | 8.520652  | 1.404187  |
| H | -6.637784 | 6.965496  | 0.997798  |
| H | -5.594909 | 7.104123  | 2.417748  |
| H | 6.364516  | -2.422677 | -0.624658 |

Optimized structure of  $D^{CS}$

| Atom | x         | y         | z         |
|------|-----------|-----------|-----------|
| C    | -0.700214 | -1.220377 | 0.002690  |
| C    | -1.101130 | 0.162253  | 0.003380  |
| C    | 1.100726  | 0.161707  | -0.003627 |
| C    | 0.699134  | -1.220718 | -0.001428 |
| C    | -1.699772 | -2.242353 | 0.002426  |
| C    | -3.023411 | -1.886145 | 0.003466  |
| C    | -3.410102 | -0.506445 | 0.010509  |
| C    | -2.406305 | 0.550450  | 0.006194  |
| C    | 2.406093  | 0.549261  | -0.006899 |



|   |            |           |           |
|---|------------|-----------|-----------|
| C | 3.409390   | -0.508107 | -0.010218 |
| C | 3.022017   | -1.887615 | -0.001454 |
| C | 1.698201   | -2.243172 | 0.000052  |
| C | 3.109649   | 1.824962  | -0.007852 |
| C | 4.503969   | 1.520887  | -0.008205 |
| C | 4.677082   | 0.072664  | -0.010049 |
| C | -4.677512  | 0.074909  | 0.009542  |
| C | -4.503747  | 1.523046  | 0.006640  |
| C | -3.109282  | 1.826475  | 0.005997  |
| C | 2.671292   | 3.144437  | -0.014367 |
| C | 3.626099   | 4.170252  | -0.021907 |
| C | 4.995245   | 3.877292  | -0.026709 |
| C | 5.445494   | 2.553624  | -0.022562 |
| C | -5.444809  | 2.556226  | 0.020248  |
| C | -4.993936  | 3.879688  | 0.023373  |
| C | -3.624656  | 4.172009  | 0.018228  |
| C | -2.670317  | 3.145750  | 0.011430  |
| C | -5.982102  | -0.632323 | 0.018529  |
| C | -6.736784  | -0.739362 | -1.171512 |
| C | -7.967626  | -1.401157 | -1.139392 |
| C | -8.477010  | -1.960181 | 0.035871  |
| C | -7.719002  | -1.837459 | 1.203155  |
| C | -6.481333  | -1.186712 | 1.218239  |
| C | -5.711315  | -1.069289 | 2.514643  |
| C | -6.223197  | -0.167787 | -2.473586 |
| C | -9.795703  | -2.696680 | 0.038334  |
| C | 5.981686   | -0.634494 | -0.018311 |
| C | 6.735055   | -0.742174 | 1.172599  |
| C | 7.962841   | -1.409641 | 1.142993  |
| C | 8.472897   | -1.969379 | -0.031691 |
| C | 7.712743   | -1.852662 | -1.198123 |
| C | 6.477997   | -1.196353 | -1.215704 |
| C | 5.704736   | -1.087915 | -2.510978 |
| C | 6.219295   | -0.172288 | 2.474556  |
| C | 9.818768   | -2.654844 | -0.045266 |
| H | -1.403509  | -3.286097 | -0.003030 |
| H | -3.798284  | -2.646886 | -0.004184 |
| H | 3.796482   | -2.648764 | 0.007274  |
| H | 1.401448   | -3.286769 | 0.006846  |
| H | 1.610764   | 3.375575  | -0.015392 |
| H | 3.298942   | 5.205722  | -0.026409 |
| H | 5.716653   | 4.689109  | -0.036164 |
| H | 6.508122   | 2.328487  | -0.033420 |
| H | -6.507549  | 2.331615  | 0.031377  |
| H | -5.714972  | 4.691839  | 0.032275  |
| H | -3.297022  | 5.207331  | 0.021902  |
| H | -1.609683  | 3.376405  | 0.012227  |
| H | -8.542345  | -1.482697 | -2.059504 |
| H | -8.102790  | -2.253804 | 2.132071  |
| H | -4.782296  | -1.649082 | 2.489381  |
| H | -6.308915  | -1.431876 | 3.355214  |
| H | -5.428237  | -0.031808 | 2.720125  |
| H | -6.910256  | -0.389242 | -3.294490 |
| H | -5.241982  | -0.580910 | -2.730828 |
| H | -6.100912  | 0.919080  | -2.418868 |
| H | -9.656457  | -3.760759 | -0.190858 |
| H | -10.482226 | -2.291666 | -0.711260 |

|   |            |           |           |
|---|------------|-----------|-----------|
| H | -10.285776 | -2.637180 | 1.014730  |
| H | 8.533232   | -1.497722 | 2.065195  |
| H | 8.091151   | -2.280742 | -2.123907 |
| H | 4.776542   | -1.668780 | -2.480617 |
| H | 6.301104   | -1.454289 | -3.350781 |
| H | 5.419861   | -0.051977 | -2.721627 |
| H | 6.096704   | 0.914572  | 2.420370  |
| H | 6.905503   | -0.393920 | 3.296124  |
| H | 5.237902   | -0.585901 | 2.730350  |
| H | 10.036486  | -3.128928 | 0.916585  |
| H | 9.868904   | -3.423928 | -0.821808 |
| H | 10.626540  | -1.939235 | -0.244130 |
| O | 0.000001   | 0.990210  | -0.000536 |

Optimized structure of  $D^{OSS}$

| Atom | x         | y         | z         |
|------|-----------|-----------|-----------|
| C    | -0.711607 | -1.236898 | 0.003164  |
| C    | -1.101068 | 0.136863  | 0.004580  |
| C    | 1.100655  | 0.136329  | -0.004892 |
| C    | 0.710539  | -1.237239 | -0.002388 |
| C    | -1.704879 | -2.248242 | 0.003825  |
| C    | -3.037780 | -1.886532 | 0.006494  |
| C    | -3.411070 | -0.514607 | 0.013641  |
| C    | -2.413788 | 0.531324  | 0.008905  |
| C    | 2.413566  | 0.530157  | -0.009570 |
| C    | 3.410361  | -0.516239 | -0.013623 |
| C    | 3.036409  | -1.887986 | -0.005244 |
| C    | 1.703333  | -2.249050 | -0.002195 |
| C    | 3.109295  | 1.812310  | -0.009115 |
| C    | 4.507798  | 1.521227  | -0.009115 |
| C    | 4.693664  | 0.081148  | -0.012640 |
| C    | -4.694093 | 0.083358  | 0.012041  |
| C    | -4.507580 | 1.523354  | 0.007915  |
| C    | -3.108941 | 1.813792  | 0.007706  |
| C    | 2.659593  | 3.126966  | -0.013847 |
| C    | 3.605527  | 4.162148  | -0.019164 |
| C    | 4.977828  | 3.883098  | -0.023363 |
| C    | 5.440266  | 2.564330  | -0.020938 |
| C    | -5.439572 | 2.566899  | 0.019398  |
| C    | -4.976509 | 3.885451  | 0.021232  |
| C    | -3.604080 | 4.163862  | 0.016742  |
| C    | -2.658625 | 3.128239  | 0.011799  |
| C    | -5.998882 | -0.621670 | 0.019037  |
| C    | -6.748406 | -0.734951 | -1.173458 |
| C    | -7.979014 | -1.397323 | -1.142865 |
| C    | -8.492269 | -1.951445 | 0.033021  |
| C    | -7.738636 | -1.823274 | 1.202689  |
| C    | -6.501685 | -1.171564 | 1.219309  |
| C    | -5.735262 | -1.046013 | 2.516914  |
| C    | -6.230119 | -0.167900 | -2.475732 |
| C    | -9.810262 | -2.689197 | 0.033814  |
| C    | 5.998489  | -0.623790 | -0.019003 |
| C    | 6.746031  | -0.739081 | 1.174623  |
| C    | 7.973579  | -1.407121 | 1.146411  |
| C    | 8.488133  | -1.960615 | -0.029257 |
| C    | 7.732990  | -1.837086 | -1.198384 |
| C    | 6.499001  | -1.179761 | -1.217375 |

|   |            |           |           |
|---|------------|-----------|-----------|
| C | 5.729931   | -1.061725 | -2.514129 |
| C | 6.224890   | -0.175075 | 2.477079  |
| C | 9.833388   | -2.647315 | -0.040916 |
| H | -1.415251  | -3.294079 | -0.001385 |
| H | -3.813494  | -2.646255 | -0.000088 |
| H | 3.811728   | -2.648110 | 0.002100  |
| H | 1.413223   | -3.294749 | 0.003977  |
| H | 1.597103   | 3.348682  | -0.015015 |
| H | 3.268221   | 5.194396  | -0.022297 |
| H | 5.691017   | 4.702098  | -0.030924 |
| H | 6.504865   | 2.348686  | -0.031127 |
| H | -6.504279  | 2.351790  | 0.029851  |
| H | -5.689322  | 4.704779  | 0.028551  |
| H | -3.266295  | 5.195955  | 0.019388  |
| H | -1.596033  | 3.349463  | 0.012804  |
| H | -8.550233  | -1.483507 | -2.064722 |
| H | -8.125200  | -2.236355 | 2.131899  |
| H | -4.791568  | -1.601127 | 2.485980  |
| H | -6.323189  | -1.430341 | 3.354587  |
| H | -5.479203  | -0.003103 | 2.731279  |
| H | -6.909971  | -0.399524 | -3.299817 |
| H | -5.244341  | -0.575632 | -2.724076 |
| H | -6.116346  | 0.920225  | -2.427244 |
| H | -9.668955  | -3.754317 | -0.189154 |
| H | -10.493988 | -2.288813 | -0.720798 |
| H | -10.304500 | -2.625048 | 1.007811  |
| H | 8.539965   | -1.500899 | 2.070507  |
| H | 8.114642   | -2.260865 | -2.124804 |
| H | 4.786841   | -1.617615 | -2.479114 |
| H | 6.316904   | -1.449233 | -3.351004 |
| H | 5.472489   | -0.020077 | -2.732884 |
| H | 6.110633   | 0.913067  | 2.430104  |
| H | 6.903568   | -0.407540 | 3.301896  |
| H | 5.238908   | -0.583704 | 2.723154  |
| H | 10.047093  | -3.125904 | 0.919591  |
| H | 9.885647   | -3.412953 | -0.820712 |
| H | 10.642537  | -1.931581 | -0.233625 |
| O | -0.000006  | 0.965906  | -0.000429 |

*Optimized structure of  $D^T$*

| Atom | x         | y         | z         |
|------|-----------|-----------|-----------|
| C    | -0.725416 | -1.253318 | 0.004509  |
| C    | -1.101924 | 0.110814  | 0.007570  |
| C    | 1.101427  | 0.110259  | -0.008260 |
| C    | 0.724238  | -1.253682 | -0.004683 |
| C    | -1.711768 | -2.252932 | 0.006281  |
| C    | -3.055556 | -1.884646 | 0.012373  |
| C    | -3.412885 | -0.521838 | 0.022345  |
| C    | -2.423306 | 0.512492  | 0.015577  |
| C    | 2.423012  | 0.511270  | -0.016371 |
| C    | 3.412086  | -0.523552 | -0.022802 |
| C    | 3.054071  | -1.886185 | -0.012237 |
| C    | 1.710094  | -2.253786 | -0.005981 |
| C    | 3.111255  | 1.797948  | -0.013702 |
| C    | 4.516414  | 1.520570  | -0.013130 |
| C    | 4.717950  | 0.095133  | -0.020182 |
| C    | -4.718454 | 0.097464  | 0.019449  |

|   |            |           |           |
|---|------------|-----------|-----------|
| C | -4.516233  | 1.522813  | 0.012440  |
| C | -3.110936  | 1.799498  | 0.012772  |
| C | 2.649880   | 3.107843  | -0.016949 |
| C | 3.585560   | 4.153048  | -0.020459 |
| C | 4.962784   | 3.889792  | -0.025055 |
| C | 5.438733   | 2.578307  | -0.024422 |
| C | -5.438012  | 2.581030  | 0.024126  |
| C | -4.961392  | 3.892272  | 0.024740  |
| C | -3.584038  | 4.154837  | 0.019738  |
| C | -2.648893  | 3.109159  | 0.015956  |
| C | -6.021228  | -0.607149 | 0.023384  |
| C | -6.784893  | -0.692673 | -1.162881 |
| C | -8.012634  | -1.360417 | -1.134464 |
| C | -8.509644  | -1.947274 | 0.032437  |
| C | -7.742085  | -1.847301 | 1.195903  |
| C | -6.507503  | -1.191741 | 1.214726  |
| C | -5.728369  | -1.091704 | 2.506823  |
| C | -6.284229  | -0.093480 | -2.457835 |
| C | -9.824569  | -2.690358 | 0.029563  |
| C | 6.020806   | -0.609347 | -0.023537 |
| C | 6.781401   | -0.698787 | 1.164478  |
| C | 8.006194   | -1.371936 | 1.138601  |
| C | 8.505658   | -1.956056 | -0.028687 |
| C | 7.737632   | -1.858784 | -1.192011 |
| C | 6.505933   | -1.197807 | -1.213360 |
| C | 5.725200   | -1.103176 | -2.504901 |
| C | 6.276628   | -0.104646 | 2.460160  |
| C | 9.848051   | -2.648230 | -0.038373 |
| H | -1.429884  | -3.301169 | -0.000411 |
| H | -3.832121  | -2.643280 | 0.005379  |
| H | 3.830227   | -2.645237 | -0.004793 |
| H | 1.427701   | -3.301882 | 0.001218  |
| H | 1.585338   | 3.319282  | -0.018507 |
| H | 3.237046   | 5.181604  | -0.022400 |
| H | 5.666033   | 4.717255  | -0.031983 |
| H | 6.505475   | 2.373650  | -0.036265 |
| H | -6.504864  | 2.376960  | 0.036401  |
| H | -5.664229  | 4.720081  | 0.031984  |
| H | -3.235006  | 5.183218  | 0.021641  |
| H | -1.584242  | 3.320053  | 0.017330  |
| H | -8.594076  | -1.425920 | -2.051613 |
| H | -8.115896  | -2.285906 | 2.118608  |
| H | -4.769277  | -1.616683 | 2.444296  |
| H | -6.294139  | -1.522686 | 3.336970  |
| H | -5.500462  | -0.049811 | 2.756016  |
| H | -6.960928  | -0.329728 | -3.283217 |
| H | -5.289741  | -0.473497 | -2.715119 |
| H | -6.197113  | 0.996296  | -2.394631 |
| H | -9.681441  | -3.748977 | -0.221440 |
| H | -10.518334 | -2.274250 | -0.707151 |
| H | -10.308010 | -2.652626 | 1.010337  |
| H | 8.581976   | -1.446430 | 2.058628  |
| H | 8.107431   | -2.306347 | -2.112028 |
| H | 4.766618   | -1.628784 | -2.439929 |
| H | 6.290660   | -1.536117 | -3.334240 |
| H | 5.496174   | -0.062261 | -2.757104 |
| H | 6.188510   | 0.985220  | 2.399881  |

|   |           |           |           |
|---|-----------|-----------|-----------|
| H | 6.951691  | -0.342478 | 3.286427  |
| H | 5.281931  | -0.486458 | 2.713991  |
| H | 10.071560 | -3.102258 | 0.931764  |
| H | 9.888064  | -3.434243 | -0.798367 |
| H | 10.657412 | -1.941006 | -0.259537 |
| O | -0.000039 | 0.940244  | -0.000521 |

*Optimized structure of TS3*

| Atom | x          | y         | z         |
|------|------------|-----------|-----------|
| C    | -8.308984  | -0.799058 | -1.410566 |
| C    | -7.959403  | 0.102852  | -0.380536 |
| C    | -8.897275  | 1.065269  | 0.056968  |
| C    | -10.159640 | 1.106920  | -0.542110 |
| C    | -10.525945 | 0.221042  | -1.559031 |
| C    | -9.584045  | -0.721815 | -1.979008 |
| C    | -6.614186  | 0.040898  | 0.239136  |
| C    | -5.396518  | 0.528300  | -0.324296 |
| C    | -4.327060  | 0.267759  | 0.602682  |
| C    | -4.893281  | -0.401031 | 1.768706  |
| C    | -6.297496  | -0.530482 | 1.530435  |
| C    | -5.157688  | 1.184365  | -1.556532 |
| C    | -3.874294  | 1.581942  | -1.899522 |
| C    | -2.811471  | 1.330259  | -1.006203 |
| C    | -3.067584  | 0.678949  | 0.230075  |
| C    | -1.397884  | 1.590487  | -1.019842 |
| C    | -0.902926  | 1.079000  | 0.203649  |
| O    | -1.910454  | 0.529023  | 0.966385  |
| C    | 0.431355   | 1.161370  | 0.555649  |
| C    | 1.314372   | 1.774037  | -0.382836 |
| C    | 0.837157   | 2.303844  | -1.597972 |
| C    | -0.511688  | 2.215471  | -1.919924 |
| C    | 1.191687   | 0.794141  | 1.745087  |
| C    | 2.537262   | 1.182192  | 1.527918  |
| C    | 2.685555   | 1.709898  | 0.140687  |
| C    | 3.501580   | 0.936779  | 2.504621  |
| C    | 3.111263   | 0.340043  | 3.707921  |
| C    | 1.777604   | -0.030335 | 3.925420  |
| C    | 0.808158   | 0.188087  | 2.943062  |
| C    | -7.114202  | -1.153611 | 2.482796  |
| C    | -6.535496  | -1.631310 | 3.660698  |
| C    | -5.159743  | -1.497446 | 3.889796  |
| C    | -4.327915  | -0.882386 | 2.943153  |
| C    | 3.717945   | 2.743671  | -0.234146 |
| C    | 4.468804   | 2.676142  | -1.433080 |
| C    | 5.431664   | 3.657707  | -1.703030 |
| C    | 5.672454   | 4.727115  | -0.843985 |
| C    | 4.869153   | 4.826606  | 0.293255  |
| C    | 3.893644   | 3.876989  | 0.608219  |
| C    | 4.291661   | 1.601758  | -2.487767 |
| C    | 3.018700   | 4.154981  | 1.813351  |
| C    | 6.745550   | 5.747576  | -1.136616 |
| C    | -8.544086  | 2.060827  | 1.138784  |
| C    | -11.908111 | 0.263773  | -2.166705 |
| C    | -7.334213  | -1.850675 | -1.890860 |
| Sn   | 3.621549   | -1.501991 | -0.720264 |
| C    | 2.819046   | -2.794782 | 0.880477  |
| C    | 3.832267   | -3.211583 | 1.955380  |

|   |            |           |           |
|---|------------|-----------|-----------|
| C | 3.222412   | -4.114643 | 3.039130  |
| C | 4.232308   | -4.542147 | 4.108817  |
| C | 2.730784   | -2.109219 | -2.647704 |
| C | 3.028041   | -3.565340 | -3.039878 |
| C | 2.397165   | -3.974375 | -4.381012 |
| C | 2.692443   | -5.426094 | -4.771027 |
| C | 5.818253   | -1.735347 | -0.862667 |
| C | 6.640174   | -0.871593 | 0.105110  |
| C | 8.156875   | -1.071887 | -0.038049 |
| C | 8.974821   | -0.209175 | 0.928201  |
| H | -3.686597  | 2.083929  | -2.843407 |
| H | -5.989370  | 1.375977  | -2.227764 |
| H | 1.523821   | 2.800223  | -2.275727 |
| H | -0.881957  | 2.631623  | -2.851551 |
| H | -0.224991  | -0.100353 | 3.107305  |
| H | 1.494663   | -0.491684 | 4.866929  |
| H | 3.850708   | 0.163060  | 4.483616  |
| H | 4.537788   | 1.218295  | 2.338461  |
| H | -8.179709  | -1.264469 | 2.302523  |
| H | -7.158336  | -2.114809 | 4.407582  |
| H | -4.730383  | -1.877242 | 4.812210  |
| H | -3.262014  | -0.786000 | 3.124017  |
| H | -10.873480 | 1.856689  | -0.207608 |
| H | -9.848085  | -1.421094 | -2.769503 |
| H | -6.458664  | -1.402865 | -2.372930 |
| H | -7.809120  | -2.520963 | -2.612214 |
| H | -6.959001  | -2.456550 | -1.059352 |
| H | -9.359214  | 2.772374  | 1.294894  |
| H | -7.642978  | 2.627459  | 0.880871  |
| H | -8.340431  | 1.565780  | 2.094162  |
| H | -12.320131 | 1.277359  | -2.153721 |
| H | -12.605523 | -0.376881 | -1.612284 |
| H | -11.901094 | -0.086441 | -3.203259 |
| H | 6.001430   | 3.582114  | -2.626811 |
| H | 4.985556   | 5.685863  | 0.950312  |
| H | 1.973510   | 3.895527  | 1.626723  |
| H | 3.060989   | 5.218810  | 2.063082  |
| H | 3.332005   | 3.593922  | 2.698873  |
| H | 4.972142   | 0.758476  | -2.324965 |
| H | 4.528559   | 2.011901  | -3.474362 |
| H | 3.276307   | 1.206965  | -2.529418 |
| H | 6.979942   | 5.787984  | -2.204381 |
| H | 6.443391   | 6.749757  | -0.816826 |
| H | 7.675933   | 5.506666  | -0.607145 |
| H | 3.177674   | 0.388870  | -0.389912 |
| H | 6.037152   | -2.798565 | -0.700354 |
| H | 6.102006   | -1.519130 | -1.900101 |
| H | 1.648854   | -1.945232 | -2.582872 |
| H | 3.102295   | -1.425134 | -3.419752 |
| H | 2.401178   | -3.680623 | 0.384714  |
| H | 1.977585   | -2.265544 | 1.338820  |
| H | 4.681828   | -3.735458 | 1.494961  |
| H | 4.250211   | -2.318605 | 2.438571  |
| H | 2.385580   | -3.584151 | 3.512383  |
| H | 2.789285   | -5.005729 | 2.564523  |
| H | 3.768150   | -5.181320 | 4.867195  |
| H | 5.065042   | -5.102090 | 3.667727  |

|   |           |           |           |
|---|-----------|-----------|-----------|
| H | 4.657073  | -3.672141 | 4.622711  |
| H | 4.113926  | -3.726298 | -3.097768 |
| H | 2.664918  | -4.248277 | -2.258786 |
| H | 1.311171  | -3.820124 | -4.326772 |
| H | 2.760565  | -3.299563 | -5.167796 |
| H | 2.230288  | -5.685720 | -5.729100 |
| H | 3.770495  | -5.600614 | -4.864427 |
| H | 2.309960  | -6.124674 | -4.018077 |
| H | 6.406633  | 0.190903  | -0.050067 |
| H | 6.351027  | -1.092960 | 1.141824  |
| H | 8.396093  | -2.132080 | 0.121591  |
| H | 8.452056  | -0.847348 | -1.072158 |
| H | 10.050010 | -0.372349 | 0.800599  |
| H | 8.779093  | 0.857439  | 0.769503  |
| H | 8.726188  | -0.437796 | 1.970947  |

*Optimized structure of E*

| Atom | x         | y         | z         |
|------|-----------|-----------|-----------|
| O    | 0.054473  | 0.907876  | 0.273264  |
| C    | -1.060097 | 0.095412  | 0.269355  |
| C    | -0.710628 | -1.264226 | 0.457818  |
| C    | 0.731394  | -1.276095 | 0.588769  |
| C    | 1.132277  | 0.070183  | 0.467662  |
| C    | -2.366947 | 0.506926  | 0.105550  |
| C    | -3.374863 | -0.512855 | 0.134479  |
| C    | -3.041555 | -1.873169 | 0.314435  |
| C    | -1.713108 | -2.250273 | 0.478554  |
| C    | 1.699042  | -2.273073 | 0.786771  |
| C    | 3.044509  | -1.909051 | 0.867642  |
| C    | 3.414462  | -0.566700 | 0.744551  |
| C    | 2.464142  | 0.456027  | 0.536338  |
| C    | -3.026546 | 1.791256  | -0.107245 |
| C    | -4.429203 | 1.526891  | -0.208808 |
| C    | -4.655821 | 0.108681  | -0.060267 |
| C    | 4.806359  | 0.048414  | 0.867394  |
| C    | 4.534600  | 1.518257  | 0.559297  |
| C    | 3.148938  | 1.744028  | 0.419961  |
| C    | 5.432183  | 2.574692  | 0.466151  |
| C    | 4.938609  | 3.863908  | 0.233889  |
| C    | 3.563914  | 4.088485  | 0.103390  |
| C    | 2.655850  | 3.031474  | 0.195255  |
| C    | -2.543221 | 3.089504  | -0.207863 |
| C    | -3.455687 | 4.135586  | -0.410243 |
| C    | -4.830990 | 3.884611  | -0.505966 |
| C    | -5.328689 | 2.584099  | -0.403768 |
| C    | 5.952029  | -0.633134 | 0.122831  |
| C    | 7.045386  | -1.149263 | 0.853686  |
| C    | 8.097530  | -1.774891 | 0.173551  |
| C    | 8.107400  | -1.906889 | -1.214472 |
| C    | 7.017140  | -1.394347 | -1.921381 |
| C    | 5.944099  | -0.762195 | -1.286466 |
| C    | -5.968400 | -0.577862 | -0.098018 |
| C    | -6.615083 | -0.803489 | -1.334041 |
| C    | -7.854925 | -1.449290 | -1.345049 |
| C    | -8.475975 | -1.879584 | -0.169482 |
| C    | -7.822716 | -1.642407 | 1.042953  |
| C    | -6.581146 | -1.002662 | 1.102470  |

|   |            |           |           |
|---|------------|-----------|-----------|
| C | -5.977482  | -0.375511 | -2.636616 |
| C | -9.801242  | -2.603031 | -0.209990 |
| C | -5.927549  | -0.751327 | 2.442717  |
| C | 7.131877   | -1.057687 | 2.365115  |
| C | 9.264843   | -2.558390 | -1.933226 |
| C | 4.809466   | -0.243407 | -2.140236 |
| H | -1.451245  | -3.294393 | 0.618270  |
| H | -3.828873  | -2.620753 | 0.319877  |
| H | 3.805998   | -2.669422 | 1.013111  |
| H | 1.405527   | -3.314521 | 0.874722  |
| H | 1.589660   | 3.202081  | 0.089028  |
| H | 3.198920   | 5.095700  | -0.075397 |
| H | 5.629961   | 4.697665  | 0.153002  |
| H | 6.500761   | 2.401935  | 0.560394  |
| H | -6.395492  | 2.390271  | -0.470022 |
| H | -5.517204  | 4.712346  | -0.658781 |
| H | -3.090130  | 5.155015  | -0.491134 |
| H | -1.479773  | 3.291814  | -0.129407 |
| H | -8.346290  | -1.622782 | -2.300036 |
| H | -8.294015  | -1.957971 | 1.971308  |
| H | -4.981238  | -1.293828 | 2.540653  |
| H | -6.581832  | -1.065941 | 3.260016  |
| H | -5.696747  | 0.310233  | 2.581804  |
| H | -6.580271  | -0.697722 | -3.489757 |
| H | -4.974971  | -0.802133 | -2.748962 |
| H | -5.864031  | 0.712128  | -2.695084 |
| H | -9.658772  | -3.687968 | -0.292425 |
| H | -10.402792 | -2.289420 | -1.068412 |
| H | -10.384549 | -2.421430 | 0.697745  |
| H | 8.931361   | -2.169763 | 0.749646  |
| H | 6.996293   | -1.488820 | -3.005007 |
| H | 3.860333   | -0.727609 | -1.890702 |
| H | 5.011729   | -0.428909 | -3.198292 |
| H | 4.662625   | 0.832966  | -2.010189 |
| H | 7.128643   | -0.020795 | 2.720601  |
| H | 8.056925   | -1.518276 | 2.720948  |
| H | 6.301533   | -1.572276 | 2.862457  |
| H | 9.839809   | -3.204093 | -1.263187 |
| H | 8.921593   | -3.165571 | -2.776919 |
| H | 9.955619   | -1.807461 | -2.336740 |
| H | 5.050078   | 0.010967  | 1.936065  |

*Optimized structure of TS4<sup>m</sup>*

| Atom | x         | y         | z         |
|------|-----------|-----------|-----------|
| C    | -3.692188 | -4.127679 | -0.105255 |
| C    | -4.087545 | -2.774343 | 0.088525  |
| C    | -5.466117 | -2.460216 | 0.004488  |
| C    | -6.382206 | -3.455004 | -0.360465 |
| C    | -5.996746 | -4.766194 | -0.630010 |
| C    | -4.646467 | -5.081006 | -0.470716 |
| C    | -3.039542 | -1.758395 | 0.459651  |
| C    | -1.727160 | -1.667775 | -0.227130 |
| C    | -0.768262 | -1.161624 | 0.687864  |
| C    | -1.392749 | -1.022275 | 1.998688  |
| C    | -2.747291 | -1.435111 | 1.874079  |
| C    | -1.410915 | -1.885606 | -1.577573 |
| C    | -0.120315 | -1.636888 | -2.043818 |



|    |           |           |           |
|----|-----------|-----------|-----------|
| C  | 0.849548  | -1.146971 | -1.153703 |
| C  | 0.504530  | -0.914814 | 0.192618  |
| O  | 1.572625  | -0.424328 | 0.914445  |
| C  | 2.623207  | -0.342370 | 0.023858  |
| C  | 2.247875  | -0.771760 | -1.264400 |
| C  | 3.908720  | 0.095558  | 0.315255  |
| C  | 4.836266  | 0.102455  | -0.747960 |
| C  | 4.490737  | -0.319169 | -2.034616 |
| C  | 3.193138  | -0.762943 | -2.300266 |
| C  | 4.562715  | 0.561379  | 1.538591  |
| C  | 5.906152  | 0.862848  | 1.230317  |
| C  | 6.163029  | 0.682425  | -0.263237 |
| C  | 6.772021  | 1.308867  | 2.221072  |
| C  | 6.289221  | 1.455198  | 3.526965  |
| C  | 4.955367  | 1.162999  | 3.830950  |
| C  | 4.079370  | 0.713204  | 2.840497  |
| C  | -3.571792 | -1.469874 | 3.001124  |
| C  | -3.051568 | -1.069708 | 4.234844  |
| C  | -1.722546 | -0.640659 | 4.348394  |
| C  | -0.881457 | -0.618602 | 3.232728  |
| C  | 7.445653  | -0.032686 | -0.681424 |
| C  | 8.402848  | 0.656444  | -1.459111 |
| C  | 9.579897  | 0.003142  | -1.844968 |
| C  | 9.846464  | -1.316984 | -1.484122 |
| C  | 8.888104  | -1.984916 | -0.718263 |
| C  | 7.698707  | -1.374611 | -0.309667 |
| C  | 8.209583  | 2.093231  | -1.904792 |
| C  | 6.723589  | -2.183494 | 0.515147  |
| C  | 11.134472 | -1.996139 | -1.884809 |
| C  | -6.040004 | -1.089053 | 0.295998  |
| C  | -6.998700 | -5.808664 | -1.063476 |
| C  | -2.278873 | -4.617536 | 0.135396  |
| Sn | -3.603124 | 1.446571  | -0.738252 |
| C  | -4.799297 | 2.699718  | 0.635565  |
| C  | -4.383643 | 2.657408  | 2.113291  |
| C  | -5.271022 | 3.525740  | 3.018649  |
| C  | -4.849323 | 3.488360  | 4.491056  |
| C  | -1.597738 | 2.307976  | -1.063484 |
| C  | -0.842419 | 2.784942  | 0.184410  |
| C  | 0.543119  | 3.367075  | -0.137878 |
| C  | 1.318585  | 3.808734  | 1.107137  |
| C  | -4.622074 | 1.408364  | -2.700063 |
| C  | -4.819742 | 2.797906  | -3.326868 |
| C  | -5.514125 | 2.754628  | -4.697813 |
| C  | -5.709756 | 4.140094  | -5.321604 |
| H  | 2.921094  | -1.098099 | -3.296415 |
| H  | 5.235681  | -0.313470 | -2.824764 |
| H  | -2.172204 | -2.260796 | -2.255184 |
| H  | 0.131038  | -1.818587 | -3.084285 |
| H  | 0.154516  | -0.308862 | 3.324370  |
| H  | -1.338474 | -0.333153 | 5.316544  |
| H  | -3.683283 | -1.098625 | 5.117893  |
| H  | -4.596521 | -1.820485 | 2.924551  |
| H  | 7.810366  | 1.529489  | 1.989134  |
| H  | 6.957347  | 1.797490  | 4.311892  |
| H  | 4.597928  | 1.282939  | 4.849536  |
| H  | 3.046649  | 0.477872  | 3.075770  |

|   |           |           |           |
|---|-----------|-----------|-----------|
| H | 9.067868  | -3.017758 | -0.427451 |
| H | 10.306398 | 0.545601  | -2.445844 |
| H | 7.317699  | 2.219814  | -2.529379 |
| H | 9.067217  | 2.426265  | -2.494756 |
| H | 8.111399  | 2.782489  | -1.058142 |
| H | 7.120000  | -3.184891 | 0.701994  |
| H | 5.759190  | -2.293458 | 0.009805  |
| H | 6.524796  | -1.714985 | 1.483679  |
| H | 11.861800 | -1.985601 | -1.063372 |
| H | 11.600511 | -1.498019 | -2.739886 |
| H | 10.967797 | -3.044330 | -2.152961 |
| H | -7.435160 | -3.189139 | -0.425357 |
| H | -4.322370 | -6.109987 | -0.611267 |
| H | -1.612331 | -4.406568 | -0.706267 |
| H | -2.283714 | -5.699938 | 0.291287  |
| H | -1.832163 | -4.153538 | 1.018599  |
| H | -5.498932 | -0.558454 | 1.080260  |
| H | -7.082154 | -1.183788 | 0.615422  |
| H | -6.038036 | -0.452962 | -0.596280 |
| H | -6.743708 | -6.797601 | -0.670007 |
| H | -8.008813 | -5.558761 | -0.725752 |
| H | -7.032625 | -5.894934 | -2.156869 |
| H | -3.488516 | -0.377174 | -0.047702 |
| H | -4.745053 | 3.728277  | 0.255317  |
| H | -5.845134 | 2.387428  | 0.525600  |
| H | -4.030022 | 0.771595  | -3.368140 |
| H | -5.590785 | 0.909210  | -2.578010 |
| H | -1.737352 | 3.142628  | -1.763735 |
| H | -1.010661 | 1.551765  | -1.596457 |
| H | -1.430767 | 3.547637  | 0.713498  |
| H | -0.720834 | 1.953451  | 0.890772  |
| H | 1.127953  | 2.616525  | -0.685935 |
| H | 0.424510  | 4.218939  | -0.821788 |
| H | 2.289525  | 4.240275  | 0.842765  |
| H | 0.762743  | 4.563855  | 1.675257  |
| H | 1.505966  | 2.961170  | 1.775577  |
| H | -5.410328 | 3.434599  | -2.653030 |
| H | -3.849332 | 3.301466  | -3.440973 |
| H | -4.925140 | 2.123770  | -5.377164 |
| H | -6.487736 | 2.257606  | -4.590261 |
| H | -6.205951 | 4.075195  | -6.295534 |
| H | -6.323280 | 4.781574  | -4.678632 |
| H | -4.749472 | 4.646751  | -5.471477 |
| H | -4.404494 | 1.623538  | 2.483383  |
| H | -3.341106 | 2.986103  | 2.219467  |
| H | -5.251737 | 4.562647  | 2.655988  |
| H | -6.313777 | 3.192277  | 2.925316  |
| H | -5.505848 | 4.105420  | 5.113462  |
| H | -4.879345 | 2.466151  | 4.885059  |
| H | -3.825651 | 3.858333  | 4.618901  |
| H | 6.210018  | 1.696140  | -0.678995 |

*Optimized structure of TS4'*

| Atom | x         | y         | z         |
|------|-----------|-----------|-----------|
| C    | -4.391848 | -3.303626 | -1.840546 |
| C    | -4.520666 | -2.128148 | -1.048596 |
| C    | -5.805008 | -1.545379 | -0.918191 |

|    |           |           |           |
|----|-----------|-----------|-----------|
| C  | -6.882131 | -2.073769 | -1.641143 |
| C  | -6.751250 | -3.176655 | -2.481890 |
| C  | -5.498093 | -3.787826 | -2.543963 |
| C  | -3.310149 | -1.609550 | -0.317639 |
| C  | -1.976745 | -1.484803 | -0.956924 |
| C  | -0.977780 | -1.638600 | 0.038708  |
| C  | -1.619689 | -1.974170 | 1.304823  |
| C  | -3.022472 | -2.011108 | 1.077563  |
| C  | -1.650609 | -1.139479 | -2.278095 |
| C  | -0.316788 | -0.973088 | -2.649813 |
| C  | 0.690889  | -1.133484 | -1.684503 |
| C  | 0.339497  | -1.456839 | -0.358757 |
| O  | 1.450994  | -1.562865 | 0.450931  |
| C  | 2.535832  | -1.312295 | -0.363900 |
| C  | 2.139999  | -1.041505 | -1.688584 |
| C  | 3.868445  | -1.310737 | 0.027741  |
| C  | 4.826183  | -1.032461 | -0.970270 |
| C  | 4.460944  | -0.761253 | -2.291532 |
| C  | 3.113086  | -0.760224 | -2.658444 |
| C  | 4.543569  | -1.525801 | 1.307971  |
| C  | 5.931753  | -1.380439 | 1.101714  |
| C  | 6.228510  | -1.148101 | -0.377312 |
| C  | 6.817859  | -1.508603 | 2.164096  |
| C  | 6.310918  | -1.785981 | 3.439219  |
| C  | 4.935236  | -1.938928 | 3.641843  |
| C  | 4.038391  | -1.811094 | 2.578812  |
| C  | -3.886678 | -2.377182 | 2.112163  |
| C  | -3.352569 | -2.677230 | 3.368151  |
| C  | -1.971027 | -2.616875 | 3.593740  |
| C  | -1.093574 | -2.270327 | 2.562906  |
| C  | 7.244214  | -0.065637 | -0.734917 |
| C  | 7.023140  | 1.293023  | -0.406417 |
| C  | 7.984610  | 2.246275  | -0.754335 |
| C  | 9.166299  | 1.908404  | -1.418029 |
| C  | 9.366753  | 0.566153  | -1.737817 |
| C  | 8.432727  | -0.424181 | -1.409394 |
| C  | 5.774639  | 1.760304  | 0.306729  |
| C  | 8.747028  | -1.854829 | -1.802778 |
| C  | 10.198541 | 2.958426  | -1.753767 |
| C  | -6.109752 | -0.362358 | -0.022642 |
| C  | -7.918732 | -3.699425 | -3.283292 |
| C  | -3.115349 | -4.116729 | -1.910183 |
| Sn | -3.178304 | 1.835502  | 0.046806  |
| C  | -4.190210 | 2.570161  | 1.870360  |
| C  | -3.869333 | 1.811590  | 3.166467  |
| C  | -4.632415 | 2.347214  | 4.387931  |
| C  | -4.304525 | 1.594661  | 5.681508  |
| C  | -1.029217 | 2.335607  | 0.065138  |
| C  | -0.269037 | 2.055380  | 1.368456  |
| C  | 1.218764  | 2.432949  | 1.289595  |
| C  | 1.990340  | 2.125780  | 2.576731  |
| C  | -4.073985 | 2.856017  | -1.697644 |
| C  | -3.962361 | 4.388326  | -1.650344 |
| C  | -4.578635 | 5.081909  | -2.876202 |
| C  | -4.466187 | 6.608978  | -2.828374 |
| H  | 2.823371  | -0.543509 | -3.682042 |
| H  | 5.225346  | -0.538387 | -3.030004 |

|   |           |           |           |
|---|-----------|-----------|-----------|
| H | -2.440685 | -1.015795 | -3.012911 |
| H | -0.060685 | -0.721708 | -3.674503 |
| H | -0.021679 | -2.246967 | 2.730535  |
| H | -1.576787 | -2.853744 | 4.577538  |
| H | -4.016108 | -2.968050 | 4.177355  |
| H | -4.956323 | -2.446357 | 1.939186  |
| H | 7.886300  | -1.384271 | 2.010507  |
| H | 6.992461  | -1.882497 | 4.279366  |
| H | 4.559881  | -2.156050 | 4.637650  |
| H | 2.970844  | -1.927413 | 2.733915  |
| H | 10.275922 | 0.275392  | -2.259337 |
| H | 7.799991  | 3.287233  | -0.497503 |
| H | 4.874009  | 1.562897  | -0.282931 |
| H | 5.822515  | 2.836044  | 0.494885  |
| H | 5.643199  | 1.256115  | 1.268786  |
| H | 9.713170  | -1.905132 | -2.311256 |
| H | 7.998991  | -2.273299 | -2.486110 |
| H | 8.801995  | -2.523073 | -0.935654 |
| H | 9.728663  | 3.894050  | -2.073385 |
| H | 10.864591 | 2.623435  | -2.554174 |
| H | 10.824517 | 3.193124  | -0.883728 |
| H | -7.857960 | -1.605631 | -1.530588 |
| H | -5.377414 | -4.689081 | -3.141262 |
| H | -2.383368 | -3.690816 | -2.603012 |
| H | -3.341049 | -5.131724 | -2.248962 |
| H | -2.625601 | -4.189631 | -0.935661 |
| H | -5.508012 | -0.349833 | 0.886754  |
| H | -7.162564 | -0.383995 | 0.274383  |
| H | -5.945924 | 0.588919  | -0.541414 |
| H | -8.873793 | -3.430932 | -2.822207 |
| H | -7.919226 | -3.284654 | -4.299199 |
| H | -7.882490 | -4.788990 | -3.380157 |
| H | -3.454991 | -0.088584 | -0.139180 |
| H | -3.926047 | 3.630597  | 1.975783  |
| H | -5.268474 | 2.541755  | 1.670514  |
| H | -3.581443 | 2.467219  | -2.596822 |
| H | -5.126629 | 2.557343  | -1.770099 |
| H | -0.963974 | 3.402072  | -0.189560 |
| H | -0.570167 | 1.789991  | -0.766832 |
| H | -0.728762 | 2.607684  | 2.199938  |
| H | -0.350809 | 0.992341  | 1.629992  |
| H | 1.679916  | 1.896552  | 0.449615  |
| H | 1.305790  | 3.502256  | 1.052054  |
| H | 3.039874  | 2.427475  | 2.496672  |
| H | 1.557537  | 2.652221  | 3.435510  |
| H | 1.972170  | 1.053462  | 2.800496  |
| H | -4.451548 | 4.773948  | -0.744676 |
| H | -2.907480 | 4.687148  | -1.571554 |
| H | -4.089608 | 4.704054  | -3.784208 |
| H | -5.634984 | 4.792093  | -2.957824 |
| H | -4.913648 | 7.072180  | -3.713914 |
| H | -4.975122 | 7.016831  | -1.947485 |
| H | -3.418768 | 6.928189  | -2.780301 |
| H | -4.096660 | 0.743660  | 3.047025  |
| H | -2.791826 | 1.860894  | 3.373156  |
| H | -4.406276 | 3.414791  | 4.515182  |
| H | -5.711717 | 2.288331  | 4.190770  |

|   |           |           |           |
|---|-----------|-----------|-----------|
| H | -4.870683 | 1.989887  | 6.531467  |
| H | -4.540997 | 0.528510  | 5.589495  |
| H | -3.239110 | 1.673653  | 5.926017  |
| H | 6.627487  | -2.099011 | -0.750563 |

Optimized structure of  $F^m$

| Atom | x          | y         | z         |
|------|------------|-----------|-----------|
| C    | 3.520331   | -4.746270 | -0.980397 |
| C    | 4.078722   | -3.455215 | -0.825489 |
| C    | 5.359470   | -3.191664 | -1.360742 |
| C    | 6.050245   | -4.208689 | -2.031186 |
| C    | 5.516266   | -5.486987 | -2.189614 |
| C    | 4.247975   | -5.729554 | -1.657077 |
| C    | 3.327448   | -2.343902 | -0.096509 |
| C    | 1.982247   | -1.901861 | -0.667464 |
| C    | 1.051222   | -1.750485 | 0.381898  |
| C    | 1.667904   | -2.156991 | 1.645227  |
| C    | 2.993238   | -2.560261 | 1.376577  |
| C    | 1.656373   | -1.610489 | -1.994910 |
| C    | 0.376086   | -1.151435 | -2.315774 |
| C    | -0.565483  | -0.980838 | -1.290746 |
| C    | -0.212047  | -1.283808 | 0.038341  |
| O    | -1.259092  | -1.061962 | 0.907648  |
| C    | -2.303063  | -0.605005 | 0.130391  |
| C    | -1.946201  | -0.531079 | -1.229565 |
| C    | -3.567869  | -0.253263 | 0.585720  |
| C    | -4.490783  | 0.196596  | -0.381713 |
| C    | -4.161865  | 0.280514  | -1.737243 |
| C    | -2.885814  | -0.087392 | -2.171098 |
| C    | -4.202920  | -0.256756 | 1.904069  |
| C    | -5.530554  | 0.196218  | 1.752464  |
| C    | -5.791056  | 0.606450  | 0.305846  |
| C    | -6.378214  | 0.270406  | 2.850799  |
| C    | -5.892592  | -0.109033 | 4.107704  |
| C    | -4.573661  | -0.550293 | 4.259114  |
| C    | -3.716224  | -0.628328 | 3.159592  |
| C    | 3.809351   | -3.022381 | 2.401953  |
| C    | 3.295664   | -3.079357 | 3.703232  |
| C    | 1.983827   | -2.672139 | 3.970532  |
| C    | 1.157449   | -2.207119 | 2.944907  |
| C    | -7.104026  | 0.160138  | -0.333104 |
| C    | -8.031945  | 1.133812  | -0.765191 |
| C    | -9.239236  | 0.727670  | -1.347199 |
| C    | -9.562498  | -0.617533 | -1.519830 |
| C    | -8.635637  | -1.567256 | -1.083664 |
| C    | -7.417898  | -1.210093 | -0.497583 |
| C    | -7.778361  | 2.622246  | -0.621745 |
| C    | -6.481727  | -2.313139 | -0.058974 |
| C    | -10.857056 | -1.036804 | -2.174864 |
| C    | 6.029731   | -1.836394 | -1.242000 |
| C    | 6.289046   | -6.579511 | -2.889586 |
| C    | 2.153892   | -5.106652 | -0.443233 |
| C    | 1.412036   | 2.855647  | -2.072477 |
| C    | 0.400326   | 3.899752  | -1.574302 |
| C    | -0.866503  | 3.977714  | -2.443490 |
| C    | -1.866874  | 5.031851  | -1.958389 |
| Sn   | 3.217861   | 2.683107  | -0.789495 |

|   |            |           |           |
|---|------------|-----------|-----------|
| C | 2.516455   | 2.331872  | 1.293595  |
| C | 3.558120   | 1.781775  | 2.275709  |
| C | 3.013495   | 1.604459  | 3.701760  |
| C | 4.049867   | 1.039854  | 4.678569  |
| C | 4.267216   | 4.646439  | -0.863919 |
| C | 5.553746   | 4.745992  | -0.035872 |
| C | 6.223546   | 6.127373  | -0.112150 |
| C | 7.509919   | 6.223748  | 0.714364  |
| H | -2.627236  | -0.033639 | -3.224123 |
| H | -4.903387  | 0.619018  | -2.454704 |
| H | 2.394660   | -1.754557 | -2.777974 |
| H | 0.114258   | -0.931843 | -3.346184 |
| H | 0.137597   | -1.898012 | 3.148675  |
| H | 1.602203   | -2.723066 | 4.986044  |
| H | 3.920387   | -3.446250 | 4.512345  |
| H | 4.825576   | -3.346679 | 2.195550  |
| H | -7.404954  | 0.606467  | 2.734786  |
| H | -6.546642  | -0.061328 | 4.973494  |
| H | -4.213526  | -0.839136 | 5.242245  |
| H | -2.694463  | -0.974819 | 3.274021  |
| H | -8.865122  | -2.624317 | -1.200319 |
| H | -9.945223  | 1.488555  | -1.672318 |
| H | -6.885042  | 2.947329  | -1.167569 |
| H | -8.623438  | 3.191116  | -1.017601 |
| H | -7.645743  | 2.923991  | 0.423655  |
| H | -6.926762  | -3.292170 | -0.254614 |
| H | -5.525723  | -2.267637 | -0.589615 |
| H | -6.256586  | -2.254184 | 1.010072  |
| H | -10.701720 | -1.304033 | -3.227616 |
| H | -11.289903 | -1.913022 | -1.681559 |
| H | -11.598093 | -0.232740 | -2.147824 |
| H | 7.034048   | -3.990588 | -2.440594 |
| H | 3.805133   | -6.716734 | -1.771075 |
| H | 1.365977   | -4.499976 | -0.900242 |
| H | 1.928071   | -6.156641 | -0.646599 |
| H | 2.088707   | -4.952805 | 0.638037  |
| H | 6.190176   | -1.541368 | -0.198570 |
| H | 7.008967   | -1.853465 | -1.727079 |
| H | 5.446667   | -1.038161 | -1.716098 |
| H | 7.057441   | -6.166545 | -3.549546 |
| H | 5.630175   | -7.213318 | -3.491588 |
| H | 6.794564   | -7.233627 | -2.168122 |
| H | 3.964222   | -1.451269 | -0.125905 |
| H | 3.534298   | 5.390739  | -0.523704 |
| H | 4.470695   | 4.868035  | -1.918143 |
| H | 0.950804   | 1.863063  | -2.115661 |
| H | 1.743998   | 3.095736  | -3.089325 |
| H | 2.129424   | 3.297458  | 1.646164  |
| H | 1.658970   | 1.652546  | 1.226338  |
| H | 4.433846   | 2.445325  | 2.311833  |
| H | 3.931462   | 0.811949  | 1.918843  |
| H | 2.141398   | 0.938493  | 3.670044  |
| H | 2.647649   | 2.573241  | 4.068972  |
| H | 3.637901   | 0.945016  | 5.688876  |
| H | 4.932850   | 1.686886  | 4.740149  |
| H | 4.385612   | 0.045742  | 4.363473  |
| H | 0.868709   | 4.893631  | -1.542171 |

|   |           |          |           |
|---|-----------|----------|-----------|
| H | 0.102514  | 3.673293 | -0.541206 |
| H | -1.349497 | 2.991641 | -2.458886 |
| H | -0.576633 | 4.193916 | -3.480808 |
| H | -2.757530 | 5.062647 | -2.594935 |
| H | -1.421682 | 6.033498 | -1.962036 |
| H | -2.197547 | 4.822040 | -0.934774 |
| H | 6.273924  | 3.985365 | -0.368780 |
| H | 5.341857  | 4.515430 | 1.017631  |
| H | 5.510324  | 6.891293 | 0.226115  |
| H | 6.442120  | 6.361716 | -1.162903 |
| H | 7.962506  | 7.218016 | 0.639275  |
| H | 8.254221  | 5.493791 | 0.375832  |
| H | 7.315427  | 6.026899 | 1.774936  |
| H | -5.789808 | 1.703105 | 0.305325  |

*Optimized structure of F<sup>r</sup>*

| Atom | x         | y         | z         |
|------|-----------|-----------|-----------|
| C    | 8.074606  | -0.846438 | -1.077437 |
| C    | 6.880696  | -0.479936 | -0.416944 |
| C    | 6.677398  | 0.875722  | -0.065433 |
| C    | 7.659748  | 1.818952  | -0.380748 |
| C    | 8.843562  | 1.474405  | -1.037186 |
| C    | 9.029843  | 0.133976  | -1.372891 |
| C    | 5.843497  | -1.552202 | -0.091859 |
| C    | 4.452174  | -1.404521 | -0.703367 |
| C    | 3.475496  | -1.684006 | 0.275436  |
| C    | 4.127809  | -1.929890 | 1.562042  |
| C    | 5.521148  | -1.804871 | 1.378251  |
| C    | 4.112135  | -1.106175 | -2.025508 |
| C    | 2.770289  | -1.080790 | -2.413625 |
| C    | 1.779167  | -1.364521 | -1.463183 |
| C    | 2.148882  | -1.660286 | -0.137229 |
| C    | 0.327549  | -1.434503 | -1.483252 |
| C    | -0.048729 | -1.764890 | -0.167063 |
| O    | 1.047858  | -1.904793 | 0.656956  |
| C    | -1.377772 | -1.926234 | 0.206127  |
| C    | -2.350163 | -1.733193 | -0.797912 |
| C    | -2.003525 | -1.406227 | -2.111767 |
| C    | -0.659153 | -1.258980 | -2.464038 |
| C    | -2.036644 | -2.284554 | 1.462733  |
| C    | -3.429169 | -2.310377 | 1.235937  |
| C    | -3.744422 | -1.873973 | -0.191894 |
| C    | -4.302775 | -2.648774 | 2.262278  |
| C    | -3.778761 | -2.960770 | 3.522662  |
| C    | -2.398292 | -2.927512 | 3.749195  |
| C    | -1.514017 | -2.589501 | 2.722167  |
| C    | 6.389360  | -1.965690 | 2.450966  |
| C    | 5.859022  | -2.254917 | 3.713781  |
| C    | 4.477937  | -2.386318 | 3.894196  |
| C    | 3.599187  | -2.225410 | 2.820817  |
| C    | -4.779812 | -2.683909 | -0.968464 |
| C    | -4.573858 | -4.051212 | -1.269770 |
| C    | -5.552343 | -4.749248 | -1.983565 |
| C    | -6.736560 | -4.146182 | -2.413603 |
| C    | -6.922319 | -2.797830 | -2.110842 |
| C    | -5.971296 | -2.057535 | -1.397687 |
| C    | -3.324625 | -4.793021 | -0.851635 |

|    |           |           |           |
|----|-----------|-----------|-----------|
| C  | -6.271575 | -0.597624 | -1.117684 |
| C  | -7.787120 | -4.935856 | -3.157587 |
| C  | 5.429640  | 1.349044  | 0.644858  |
| C  | 9.872041  | 2.522600  | -1.389658 |
| C  | 8.375545  | -2.276254 | -1.484056 |
| C  | -0.770281 | 2.842977  | -1.907314 |
| Sn | -2.516209 | 3.003152  | -0.542637 |
| C  | -3.041007 | 5.163104  | -0.400231 |
| C  | -4.233304 | 5.501857  | 0.502189  |
| C  | -4.537224 | 7.006978  | 0.572381  |
| C  | -5.730000 | 7.343250  | 1.473132  |
| C  | 0.485383  | 3.561635  | -1.389002 |
| C  | 1.698755  | 3.407406  | -2.321920 |
| C  | 2.946111  | 4.139286  | -1.816377 |
| C  | -1.857723 | 2.296843  | 1.462867  |
| C  | -2.970926 | 1.925540  | 2.450364  |
| C  | -2.441347 | 1.490481  | 3.825862  |
| C  | -3.552865 | 1.106161  | 4.807587  |
| H  | 2.499554  | -0.845890 | -3.438399 |
| H  | 4.891344  | -0.882567 | -2.748024 |
| H  | -2.778945 | -1.281354 | -2.861525 |
| H  | -0.383275 | -1.014908 | -3.485238 |
| H  | -0.442798 | -2.571225 | 2.893391  |
| H  | -2.009633 | -3.172573 | 4.733267  |
| H  | -4.450069 | -3.234596 | 4.331312  |
| H  | -5.374402 | -2.683676 | 2.086536  |
| H  | 7.461885  | -1.857139 | 2.314992  |
| H  | 6.526369  | -2.377001 | 4.561952  |
| H  | 4.084322  | -2.611916 | 4.881031  |
| H  | 2.527424  | -2.321255 | 2.959666  |
| H  | 9.945533  | -0.163573 | -1.878925 |
| H  | 7.491419  | 2.856788  | -0.101233 |
| H  | 4.531787  | 1.175446  | 0.043434  |
| H  | 5.491814  | 2.420520  | 0.852326  |
| H  | 5.281521  | 0.830792  | 1.596917  |
| H  | 9.350284  | -2.334086 | -1.974988 |
| H  | 7.634682  | -2.674103 | -2.187266 |
| H  | 8.404089  | -2.957037 | -0.625460 |
| H  | 9.593510  | 3.061193  | -2.304114 |
| H  | 10.856017 | 2.076441  | -1.560574 |
| H  | 9.971766  | 3.268791  | -0.594960 |
| H  | -7.833500 | -2.301716 | -2.437468 |
| H  | -5.379462 | -5.799160 | -2.210329 |
| H  | -2.427310 | -4.366569 | -1.310714 |
| H  | -3.385979 | -5.842906 | -1.149659 |
| H  | -3.175459 | -4.760002 | 0.231706  |
| H  | -6.311274 | -0.379377 | -0.044221 |
| H  | -7.241391 | -0.321853 | -1.539474 |
| H  | -5.524418 | 0.074947  | -1.555094 |
| H  | -8.452644 | -4.280097 | -3.726404 |
| H  | -7.333935 | -5.646780 | -3.855780 |
| H  | -8.411565 | -5.516165 | -2.466770 |
| H  | -4.131102 | -0.850785 | -0.109205 |
| H  | -2.133861 | 5.668995  | -0.042306 |
| H  | -3.217012 | 5.523295  | -1.420624 |
| H  | -0.570636 | 1.775757  | -2.052054 |
| H  | -1.068631 | 3.245093  | -2.882566 |



|   |           |           |           |
|---|-----------|-----------|-----------|
| H | -1.234299 | 3.102412  | 1.873711  |
| H | -1.196146 | 1.439654  | 1.293004  |
| H | -3.655532 | 2.774592  | 2.587567  |
| H | -3.582157 | 1.111981  | 2.035478  |
| H | -1.761233 | 0.639071  | 3.693288  |
| H | -1.837007 | 2.303803  | 4.250739  |
| H | -3.144567 | 0.821307  | 5.783057  |
| H | -4.246948 | 1.939359  | 4.969291  |
| H | -4.132849 | 0.256439  | 4.430978  |
| H | 0.278088  | 4.632464  | -1.252914 |
| H | 0.756281  | 3.178364  | -0.395489 |
| H | 1.922600  | 2.339006  | -2.442124 |
| H | 1.432188  | 3.779157  | -3.320686 |
| H | 3.791267  | 4.011137  | -2.500741 |
| H | 2.761244  | 5.214896  | -1.713759 |
| H | 3.255171  | 3.762459  | -0.834724 |
| H | -5.131771 | 4.976006  | 0.149686  |
| H | -4.051379 | 5.131828  | 1.520982  |
| H | -3.644266 | 7.537121  | 0.930521  |
| H | -4.724779 | 7.382036  | -0.442965 |
| H | -5.920799 | 8.421124  | 1.501883  |
| H | -6.644528 | 6.853579  | 1.119172  |
| H | -5.555920 | 7.009489  | 2.502541  |
| H | 6.232651  | -2.502819 | -0.476063 |

*Optimized structure of Int1*

| Atom | x         | y         | z         |
|------|-----------|-----------|-----------|
| C    | -6.959703 | -0.838924 | 1.640225  |
| C    | -6.584374 | -0.716461 | 0.283591  |
| C    | -7.420544 | -1.243594 | -0.726651 |
| C    | -8.607621 | -1.884686 | -0.361092 |
| C    | -8.995065 | -2.019636 | 0.974935  |
| C    | -8.157976 | -1.485830 | 1.958071  |
| C    | -5.324689 | -0.023462 | -0.082063 |
| C    | -4.031656 | -0.531056 | 0.016136  |
| C    | -3.082134 | 0.475689  | -0.440277 |
| C    | -3.856548 | 1.652927  | -0.829954 |
| C    | -5.229628 | 1.334536  | -0.607112 |
| C    | -3.567706 | -1.808998 | 0.457299  |
| C    | -2.229085 | -2.089892 | 0.463656  |
| C    | -1.274922 | -1.114280 | 0.025445  |
| C    | -1.746696 | 0.175287  | -0.428214 |
| C    | 0.120844  | -1.236032 | -0.033774 |
| C    | 0.766920  | -0.042803 | -0.534411 |
| S    | -0.407767 | 1.219982  | -0.928741 |
| C    | 2.129093  | 0.021758  | -0.658123 |
| C    | 2.928255  | -1.135146 | -0.276981 |
| C    | 2.288866  | -2.318208 | 0.207319  |
| C    | 0.927210  | -2.364479 | 0.327938  |
| C    | 3.058127  | 1.051239  | -1.119354 |
| C    | 4.373360  | 0.502785  | -1.007022 |
| C    | 4.276611  | -0.857041 | -0.484325 |
| C    | -6.223718 | 2.277326  | -0.875291 |
| C    | -5.850113 | 3.529870  | -1.374319 |
| C    | -4.504577 | 3.838938  | -1.597328 |
| C    | -3.497013 | 2.902123  | -1.324290 |
| C    | 2.872294  | 2.353158  | -1.598763 |

|   |            |           |           |
|---|------------|-----------|-----------|
| C | 4.027609   | 3.038110  | -1.933976 |
| C | 5.321290   | 2.563579  | -1.843687 |
| C | 5.497097   | 1.254238  | -1.358897 |
| C | 5.424518   | -1.764608 | -0.240991 |
| C | 5.889616   | -1.994631 | 1.074156  |
| C | 6.977816   | -2.852528 | 1.264434  |
| C | 7.620548   | -3.487167 | 0.198672  |
| C | 7.140270   | -3.251011 | -1.092171 |
| C | 6.057323   | -2.401101 | -1.333572 |
| C | 5.256691   | -1.315995 | 2.267879  |
| C | 8.814715   | -4.381763 | 0.432685  |
| C | 5.561173   | -2.203243 | -2.748455 |
| C | -7.038432  | -1.143096 | -2.186064 |
| C | -10.267862 | -2.743286 | 1.345782  |
| C | -6.101500  | -0.265048 | 2.745514  |
| C | 4.280233   | 4.262509  | 1.739990  |
| C | 5.108681   | 3.191701  | 2.316966  |
| N | 5.760360   | 2.350918  | 2.782883  |
| C | 4.802451   | 5.643831  | 2.181410  |
| C | 2.797598   | 4.052286  | 2.104841  |
| H | -1.874988  | -3.059312 | 0.798350  |
| H | -4.290355  | -2.551355 | 0.782467  |
| H | 2.897956   | -3.175944 | 0.475823  |
| H | 0.441445   | -3.261650 | 0.697069  |
| H | 1.887047   | 2.797532  | -1.704184 |
| H | 6.494003   | 0.835020  | -1.255215 |
| H | -7.268373  | 2.040161  | -0.695611 |
| H | -6.613671  | 4.271669  | -1.589175 |
| H | -4.234248  | 4.816585  | -1.984726 |
| H | -2.457230  | 3.161401  | -1.499386 |
| H | -9.245086  | -2.291483 | -1.143176 |
| H | -8.446824  | -1.568171 | 3.003652  |
| H | -5.146885  | -0.794559 | 2.835837  |
| H | -6.613545  | -0.332856 | 3.708985  |
| H | -5.860755  | 0.787014  | 2.561146  |
| H | -7.770131  | -1.654930 | -2.816558 |
| H | -6.056668  | -1.591308 | -2.372789 |
| H | -6.975952  | -0.101593 | -2.518666 |
| H | -10.089158 | -3.817914 | 1.477553  |
| H | -11.030996 | -2.635284 | 0.569143  |
| H | -10.683633 | -2.366531 | 2.285035  |
| H | 7.334600   | -3.023918 | 2.277581  |
| H | 7.615770   | -3.746273 | -1.936069 |
| H | 4.500892   | -2.462275 | -2.840322 |
| H | 6.123734   | -2.826601 | -3.448391 |
| H | 5.658738   | -1.161688 | -3.072715 |
| H | 5.347799   | -0.225932 | 2.211559  |
| H | 5.740233   | -1.638054 | 3.193720  |
| H | 4.189495   | -1.545848 | 2.349152  |
| H | 8.757409   | -4.880067 | 1.405128  |
| H | 8.895889   | -5.152355 | -0.339866 |
| H | 9.749253   | -3.806838 | 0.417856  |
| H | 2.650471   | 4.103984  | 3.187748  |
| H | 2.192243   | 4.834857  | 1.637849  |
| H | 2.437894   | 3.082826  | 1.752173  |
| H | 4.719395   | 5.763437  | 3.265772  |
| H | 5.849936   | 5.782104  | 1.901033  |

|   |          |          |           |
|---|----------|----------|-----------|
| H | 4.209883 | 6.429297 | 1.703015  |
| H | 4.382907 | 4.176351 | 0.650587  |
| H | 6.177370 | 3.167050 | -2.130436 |

Table S20  
Optimized structure of TS5

| Atom | x          | y         | z         |
|------|------------|-----------|-----------|
| C    | -7.404801  | -1.094977 | -0.946400 |
| C    | -6.604666  | -0.742339 | 0.163763  |
| C    | -7.022343  | -1.088441 | 1.468468  |
| C    | -8.227952  | -1.776253 | 1.636208  |
| C    | -9.034358  | -2.132316 | 0.551962  |
| C    | -8.601336  | -1.784731 | -0.730541 |
| C    | -5.330887  | -0.012572 | -0.040927 |
| C    | -4.018579  | -0.565375 | 0.009404  |
| C    | -3.060330  | 0.477624  | -0.241202 |
| C    | -3.806042  | 1.719361  | -0.450965 |
| C    | -5.194465  | 1.399745  | -0.326733 |
| C    | -3.595134  | -1.894171 | 0.239081  |
| C    | -2.245338  | -2.195446 | 0.233189  |
| C    | -1.283232  | -1.186055 | -0.005528 |
| C    | -1.715252  | 0.153859  | -0.243813 |
| C    | 0.148880   | -1.317102 | -0.049068 |
| C    | 0.800539   | -0.075658 | -0.321353 |
| S    | -0.352502  | 1.249073  | -0.524953 |
| C    | 2.180300   | -0.005633 | -0.398399 |
| C    | 2.944756   | -1.198885 | -0.200818 |
| C    | 2.310739   | -2.425530 | 0.067979  |
| C    | 0.926499   | -2.479500 | 0.141567  |
| C    | 3.131729   | 1.080667  | -0.644853 |
| C    | 4.455954   | 0.493728  | -0.597332 |
| C    | 4.347705   | -0.882835 | -0.323483 |
| C    | 5.590842   | 1.306971  | -0.841722 |
| C    | 5.419695   | 2.648144  | -1.104686 |
| C    | 4.126476   | 3.248541  | -1.051990 |
| C    | 2.970434   | 2.418093  | -0.900421 |
| C    | -6.163473  | 2.399800  | -0.466170 |
| C    | -5.751823  | 3.707065  | -0.737673 |
| C    | -4.392577  | 4.016423  | -0.863639 |
| C    | -3.410507  | 3.024627  | -0.719048 |
| C    | 5.470538   | -1.841836 | -0.167386 |
| C    | 5.933935   | -2.577439 | -1.279129 |
| C    | 6.994920   | -3.471746 | -1.107183 |
| C    | 7.609909   | -3.656627 | 0.133987  |
| C    | 7.129380   | -2.923755 | 1.222803  |
| C    | 6.070489   | -2.018757 | 1.099129  |
| C    | 5.300858   | -2.407451 | -2.641832 |
| C    | 5.571725   | -1.263162 | 2.309721  |
| C    | 8.777313   | -4.602612 | 0.289804  |
| C    | -6.196379  | -0.712442 | 2.678104  |
| C    | -10.348166 | -2.847346 | 0.761600  |
| C    | -6.971406  | -0.761757 | -2.356167 |
| C    | 4.143551   | 4.423669  | 0.996429  |
| C    | 5.182479   | 5.479922  | 0.699520  |
| C    | 2.713908   | 4.890663  | 1.131834  |

|   |            |           |           |
|---|------------|-----------|-----------|
| C | 4.553495   | 3.358587  | 1.834257  |
| N | 4.909480   | 2.457412  | 2.489031  |
| H | -1.916308  | -3.214619 | 0.409916  |
| H | -4.333049  | -2.670928 | 0.415236  |
| H | 2.906624   | -3.320402 | 0.218718  |
| H | 0.432862   | -3.423521 | 0.350329  |
| H | 1.984204   | 2.866334  | -0.967903 |
| H | 3.993467   | 4.237237  | -1.479256 |
| H | 6.280909   | 3.271720  | -1.323785 |
| H | 6.580914   | 0.860842  | -0.844424 |
| H | -7.217499  | 2.159216  | -0.361037 |
| H | -6.493465  | 4.492367  | -0.850061 |
| H | -4.091750  | 5.038420  | -1.074009 |
| H | -2.361213  | 3.286324  | -0.816091 |
| H | -9.207984  | -2.062249 | -1.589890 |
| H | -8.545801  | -2.037372 | 2.643322  |
| H | -5.229224  | -1.226306 | 2.685558  |
| H | -6.720433  | -0.969847 | 3.602283  |
| H | -5.981586  | 0.361260  | 2.697217  |
| H | -7.674317  | -1.170499 | -3.086797 |
| H | -5.978607  | -1.169030 | -2.575585 |
| H | -6.909333  | 0.319847  | -2.516248 |
| H | -10.326344 | -3.470092 | 1.660919  |
| H | -10.595284 | -3.488841 | -0.089643 |
| H | -11.173464 | -2.133996 | 0.880593  |
| H | 7.588381   | -3.059994 | 2.199651  |
| H | 7.348819   | -4.037462 | -1.966430 |
| H | 4.233049   | -2.651240 | -2.623291 |
| H | 5.781893   | -3.054859 | -3.379760 |
| H | 5.380623   | -1.373794 | -2.995722 |
| H | 5.604680   | -0.177999 | 2.168531  |
| H | 6.168847   | -1.506873 | 3.192464  |
| H | 4.528586   | -1.515623 | 2.531720  |
| H | 8.741800   | -5.408257 | -0.449625 |
| H | 9.732604   | -4.079613 | 0.155402  |
| H | 8.795054   | -5.056213 | 1.285472  |
| H | 2.613321   | 5.573946  | 1.987734  |
| H | 2.403115   | 5.445633  | 0.239740  |
| H | 2.024383   | 4.058854  | 1.287590  |
| H | 5.288721   | 6.165989  | 1.552302  |
| H | 6.163852   | 5.042664  | 0.503326  |
| H | 4.884634   | 6.083486  | -0.164524 |

*Optimized structure of Int2*

| Atom | x         | y         | z         |
|------|-----------|-----------|-----------|
| C    | -7.048081 | -1.138908 | 1.419286  |
| C    | -6.614920 | -0.736419 | 0.135776  |
| C    | -7.409139 | -1.027422 | -0.996347 |
| C    | -8.613994 | -1.714838 | -0.823393 |
| C    | -9.058531 | -2.124028 | 0.436755  |
| C    | -8.261457 | -1.822025 | 1.544128  |
| C    | -5.335976 | -0.005062 | -0.021999 |
| C    | -4.020286 | -0.572158 | 0.022292  |
| C    | -3.056250 | 0.471518  | -0.173089 |
| C    | -3.790908 | 1.726098  | -0.339681 |
| C    | -5.184475 | 1.413055  | -0.246577 |
| C    | -3.610899 | -1.909240 | 0.200831  |

|   |            |           |           |
|---|------------|-----------|-----------|
| C | -2.259484  | -2.219847 | 0.197754  |
| C | -1.291985  | -1.210439 | 0.012247  |
| C | -1.710092  | 0.137489  | -0.174658 |
| C | 0.149290   | -1.347962 | -0.021762 |
| C | 0.805903   | -0.104970 | -0.235877 |
| S | -0.336692  | 1.233577  | -0.396054 |
| C | 2.191713   | -0.042563 | -0.300136 |
| C | 2.943070   | -1.239268 | -0.147392 |
| C | 2.307630   | -2.467861 | 0.069940  |
| C | 0.917628   | -2.516298 | 0.129693  |
| C | 3.154188   | 1.049302  | -0.482777 |
| C | 4.490131   | 0.429798  | -0.455371 |
| C | 4.373783   | -0.920513 | -0.251755 |
| C | -6.143869  | 2.427830  | -0.355783 |
| C | -5.718438  | 3.741098  | -0.566265 |
| C | -4.354531  | 4.043608  | -0.661573 |
| C | -3.382270  | 3.038385  | -0.546801 |
| C | 2.995117   | 2.376341  | -0.640638 |
| C | 4.173616   | 3.312279  | -0.755007 |
| C | 5.500115   | 2.595721  | -0.846617 |
| C | 5.641735   | 1.265703  | -0.680507 |
| C | 5.476526   | -1.910049 | -0.134300 |
| C | 6.171337   | -2.047533 | 1.087784  |
| C | 7.200476   | -2.990017 | 1.179000  |
| C | 7.562809   | -3.798641 | 0.098245  |
| C | 6.857696   | -3.650821 | -1.099189 |
| C | 5.821344   | -2.722327 | -1.236254 |
| C | 4.172948   | 4.408156  | 0.404119  |
| C | 4.410814   | 3.738148  | 1.697796  |
| N | 4.602580   | 3.228900  | 2.723559  |
| C | 5.808168   | -1.209716 | 2.293386  |
| C | 8.700176   | -4.785954 | 0.213993  |
| C | 5.096244   | -2.590784 | -2.556544 |
| C | -6.964789  | -0.624761 | -2.384462 |
| C | -10.348995 | -2.892975 | 0.593977  |
| C | -6.234535  | -0.818642 | 2.653065  |
| C | 5.296758   | 5.446216  | 0.171850  |
| C | 2.817328   | 5.150924  | 0.468976  |
| H | -1.940143  | -3.248159 | 0.336037  |
| H | -4.355202  | -2.688091 | 0.336099  |
| H | 2.896409   | -3.371385 | 0.193962  |
| H | 0.419113   | -3.466106 | 0.298218  |
| H | 2.003613   | 2.815524  | -0.683288 |
| H | 4.038806   | 3.916206  | -1.668833 |
| H | 6.374929   | 3.203830  | -1.052658 |
| H | 6.623046   | 0.802954  | -0.739773 |
| H | -7.201043  | 2.192080  | -0.273627 |
| H | -6.451891  | 4.537105  | -0.654307 |
| H | -4.042811  | 5.071115  | -0.823871 |
| H | -2.329784  | 3.295423  | -0.618289 |
| H | -9.219343  | -1.938693 | -1.699168 |
| H | -8.594559  | -2.120219 | 2.535905  |
| H | -5.265984  | -1.329792 | 2.644693  |
| H | -6.766125  | -1.121044 | 3.559129  |
| H | -6.023023  | 0.253504  | 2.725186  |
| H | -7.660720  | -0.998716 | -3.140003 |
| H | -5.969447  | -1.019543 | -2.614850 |

|   |            |           |           |
|---|------------|-----------|-----------|
| H | -6.903352  | 0.463385  | -2.491542 |
| H | -10.178810 | -3.974126 | 0.514538  |
| H | -11.073730 | -2.621851 | -0.179605 |
| H | -10.808776 | -2.708538 | 1.569523  |
| H | 7.729414   | -3.097273 | 2.123529  |
| H | 7.120293   | -4.273594 | -1.951698 |
| H | 4.026686   | -2.803818 | -2.453869 |
| H | 5.507455   | -3.280307 | -3.298484 |
| H | 5.176231   | -1.574410 | -2.957166 |
| H | 5.977930   | -0.142086 | 2.119767  |
| H | 6.398846   | -1.506147 | 3.164071  |
| H | 4.749097   | -1.316812 | 2.551008  |
| H | 8.791052   | -5.174412 | 1.232875  |
| H | 8.563979   | -5.635268 | -0.462194 |
| H | 9.659469   | -4.318121 | -0.041114 |
| H | 2.868328   | 5.960845  | 1.201386  |
| H | 2.588505   | 5.588558  | -0.508520 |
| H | 1.998561   | 4.490611  | 0.758883  |
| H | 5.250241   | 6.227095  | 0.935437  |
| H | 6.289312   | 4.995513  | 0.215652  |
| H | 5.166624   | 5.917491  | -0.807953 |

*Optimized structure of TS6*

| Atom | x         | y         | z         |
|------|-----------|-----------|-----------|
| C    | -7.782142 | -0.587918 | -1.249099 |
| C    | -7.051697 | -0.637308 | -0.040352 |
| C    | -7.601643 | -1.287693 | 1.087172  |
| C    | -8.867466 | -1.872072 | 0.983856  |
| C    | -9.606761 | -1.832864 | -0.201339 |
| C    | -9.042919 | -1.188861 | -1.306103 |
| C    | -5.712124 | -0.009293 | 0.043492  |
| C    | -4.454357 | -0.684406 | 0.013735  |
| C    | -3.400261 | 0.285858  | 0.123186  |
| C    | -4.024638 | 1.605935  | 0.227968  |
| C    | -5.439633 | 1.405074  | 0.174530  |
| C    | -4.160377 | -2.059474 | -0.115556 |
| C    | -2.842194 | -2.481515 | -0.128124 |
| C    | -1.787713 | -1.547043 | -0.017355 |
| C    | -2.089295 | -0.158422 | 0.107311  |
| C    | -0.368902 | -1.802274 | -0.016203 |
| C    | 0.397375  | -0.605937 | 0.109612  |
| S    | -0.624551 | 0.830009  | 0.227566  |
| C    | 1.782288  | -0.656220 | 0.126506  |
| C    | 2.429905  | -1.922511 | 0.010360  |
| C    | 1.682835  | -3.106531 | -0.106632 |
| C    | 0.295919  | -3.041313 | -0.120731 |
| C    | 2.835743  | 0.357208  | 0.242121  |
| C    | 4.105332  | -0.358364 | 0.184861  |
| C    | 3.868626  | -1.723756 | 0.048024  |
| C    | 5.316643  | 0.385686  | 0.288864  |
| C    | 5.278572  | 1.740945  | 0.435089  |
| C    | 4.024054  | 2.523375  | 0.424873  |
| C    | 2.790775  | 1.706088  | 0.396825  |
| C    | -6.311083 | 2.496653  | 0.265200  |
| C    | -5.775137 | 3.780032  | 0.397835  |
| C    | -4.389867 | 3.974219  | 0.445384  |
| C    | -3.505201 | 2.887716  | 0.362852  |

|   |            |           |           |
|---|------------|-----------|-----------|
| C | 4.887528   | -2.802127 | -0.029299 |
| C | 5.239956   | -3.354157 | -1.280421 |
| C | 6.196112   | -4.372801 | -1.329220 |
| C | 6.814035   | -4.862212 | -0.175159 |
| C | 6.445679   | -4.307064 | 1.053229  |
| C | 5.495461   | -3.285733 | 1.150340  |
| C | 4.608998   | -2.851516 | -2.559365 |
| C | 5.123449   | -2.730335 | 2.506786  |
| C | 7.867142   | -5.941920 | -0.255473 |
| C | 4.001421   | 3.742383  | 1.432598  |
| C | 5.163399   | 4.733467  | 1.175557  |
| C | -6.852308  | -1.343288 | 2.399518  |
| C | -10.985655 | -2.444287 | -0.278232 |
| C | -7.208939  | 0.077645  | -2.479931 |
| C | 2.668812   | 4.530072  | 1.386920  |
| C | 4.160603   | 3.187139  | 2.795383  |
| N | 4.285575   | 2.770107  | 3.872169  |
| C | 4.056609   | 3.613420  | -2.222043 |
| C | 3.062680   | 2.645471  | -2.830089 |
| C | 3.636135   | 4.968590  | -2.133950 |
| N | 3.284703   | 6.077226  | -2.001856 |
| C | 5.518339   | 3.378547  | -2.538011 |
| H | -2.612023  | -3.537702 | -0.226778 |
| H | -4.970204  | -2.776706 | -0.207999 |
| H | 2.190679   | -4.062909 | -0.183463 |
| H | -0.285947  | -3.953243 | -0.211996 |
| H | 1.837610   | 2.220094  | 0.450159  |
| H | 4.013387   | 3.106255  | -0.691238 |
| H | 6.211845   | 2.281900  | 0.544791  |
| H | 6.268188   | -0.138572 | 0.277365  |
| H | -7.385933  | 2.342920  | 0.235785  |
| H | -6.439400  | 4.636206  | 0.467470  |
| H | -3.991622  | 4.978888  | 0.550116  |
| H | -2.434304  | 3.060911  | 0.407234  |
| H | -9.596237  | -1.156606 | -2.242175 |
| H | -9.287464  | -2.368299 | 1.856072  |
| H | -5.931209  | -1.930131 | 2.317467  |
| H | -7.469219  | -1.794790 | 3.180808  |
| H | -6.558714  | -0.342937 | 2.734872  |
| H | -7.877849  | -0.044340 | -3.335814 |
| H | -6.235313  | -0.347004 | -2.747236 |
| H | -7.051942  | 1.150365  | -2.325186 |
| H | -11.086655 | -3.292157 | 0.405824  |
| H | -11.212509 | -2.794877 | -1.289537 |
| H | -11.758605 | -1.714260 | -0.006817 |
| H | 6.906031   | -4.681487 | 1.964891  |
| H | 6.464743   | -4.793809 | -2.295662 |
| H | 3.524598   | -3.005574 | -2.564378 |
| H | 5.026164   | -3.365991 | -3.428888 |
| H | 4.774299   | -1.776510 | -2.690941 |
| H | 5.409282   | -1.678024 | 2.608956  |
| H | 5.618254   | -3.289754 | 3.304795  |
| H | 4.043038   | -2.779263 | 2.678209  |
| H | 7.702328   | -6.599410 | -1.114287 |
| H | 8.869946   | -5.510089 | -0.364661 |
| H | 7.877373   | -6.559148 | 0.647807  |
| H | 2.732191   | 5.387134  | 2.062187  |

|   |          |          |           |
|---|----------|----------|-----------|
| H | 2.486490 | 4.910189 | 0.378796  |
| H | 1.819227 | 3.924279 | 1.706676  |
| H | 5.142550 | 5.523741 | 1.930175  |
| H | 6.142604 | 4.254490 | 1.229873  |
| H | 5.044072 | 5.201951 | 0.196005  |
| H | 5.690463 | 3.400156 | -3.623077 |
| H | 6.162002 | 4.134845 | -2.082329 |
| H | 5.829147 | 2.392105 | -2.175820 |
| H | 3.032698 | 2.756567 | -3.923028 |
| H | 3.352189 | 1.614041 | -2.609554 |
| H | 2.049928 | 2.807230 | -2.452512 |

*Optimized structure of Int3*

| Atom | x          | y         | z         |
|------|------------|-----------|-----------|
| C    | 5.768541   | -2.783501 | -1.217389 |
| C    | 5.426435   | -2.112527 | -0.021937 |
| C    | 6.138797   | -2.387755 | 1.167218  |
| C    | 7.174283   | -3.326146 | 1.137236  |
| C    | 7.531567   | -3.997221 | -0.035480 |
| C    | 6.813623   | -3.712066 | -1.199861 |
| C    | 4.325145   | -1.120128 | -0.014160 |
| C    | 2.935585   | -1.395613 | -0.015870 |
| C    | 2.205125   | -0.151483 | -0.009352 |
| C    | 3.189248   | 0.931784  | -0.007240 |
| C    | 4.480585   | 0.321536  | -0.007992 |
| C    | 2.247090   | -2.634858 | -0.008173 |
| C    | 0.868414   | -2.654258 | -0.004549 |
| C    | 0.127346   | -1.443048 | -0.002967 |
| C    | 0.825723   | -0.191859 | -0.003539 |
| S    | -0.285595  | 1.184367  | 0.005656  |
| C    | -1.683897  | 0.099826  | 0.009367  |
| C    | -1.290838  | -1.278259 | 0.003214  |
| C    | -3.016712  | 0.456770  | 0.016005  |
| C    | -4.011994  | -0.587646 | 0.017545  |
| C    | -3.626825  | -1.951666 | 0.004839  |
| C    | -2.289435  | -2.287502 | 0.000437  |
| C    | -3.725404  | 1.737517  | 0.019690  |
| C    | -5.122944  | 1.439991  | 0.019054  |
| C    | -5.300733  | -0.000108 | 0.018114  |
| C    | -6.064311  | 2.473667  | 0.035455  |
| C    | -5.614425  | 3.797206  | 0.042557  |
| C    | -4.245609  | 4.086494  | 0.038676  |
| C    | -3.291177  | 3.057803  | 0.029207  |
| C    | 5.622882   | 1.123141  | -0.020042 |
| C    | 5.482918   | 2.514299  | -0.020632 |
| C    | 4.219409   | 3.122825  | -0.015099 |
| C    | 3.064396   | 2.313191  | -0.010712 |
| C    | -6.599236  | -0.715697 | 0.022463  |
| C    | -7.093157  | -1.281217 | 1.219273  |
| C    | -8.324351  | -1.943492 | 1.200129  |
| C    | -9.080355  | -2.067569 | 0.031499  |
| C    | -8.575541  | -1.498225 | -1.140790 |
| C    | -7.351065  | -0.824607 | -1.169078 |
| C    | -6.324550  | -1.160108 | 2.516034  |
| C    | -6.841324  | -0.242606 | -2.468182 |
| C    | -10.391678 | -2.816961 | 0.029356  |
| C    | 4.045688   | 4.653748  | -0.017493 |



|   |            |           |           |
|---|------------|-----------|-----------|
| C | 3.286938   | 5.124265  | 1.253554  |
| C | 5.779123   | -1.705138 | 2.467590  |
| C | 8.677830   | -4.980522 | -0.049634 |
| C | 5.036910   | -2.500410 | -2.510346 |
| C | 5.360231   | 5.328647  | -0.016976 |
| N | 6.374333   | 5.894192  | -0.016534 |
| C | 3.289620   | 5.119975  | -1.291783 |
| H | -1.990865  | -3.330854 | -0.009045 |
| H | -4.390292  | -2.723597 | -0.004689 |
| H | 2.812656   | -3.561616 | -0.001467 |
| H | 0.338473   | -3.601357 | 0.001148  |
| H | 2.080555   | 2.771563  | -0.011873 |
| H | 6.373286   | 3.133994  | -0.027600 |
| H | 6.611506   | 0.673765  | -0.031727 |
| H | -7.126622  | 2.247404  | 0.045713  |
| H | -6.334547  | 4.609951  | 0.053588  |
| H | -3.915198  | 5.120829  | 0.045520  |
| H | -2.233524  | 3.303225  | 0.031321  |
| H | -9.148543  | -1.581429 | -2.061763 |
| H | -8.704492  | -2.368412 | 2.126596  |
| H | -5.373914  | -1.702686 | 2.476818  |
| H | -6.905102  | -1.561084 | 3.350960  |
| H | -6.081586  | -0.116385 | 2.741643  |
| H | -7.520959  | -0.474522 | -3.292285 |
| H | -5.852471  | -0.639212 | -2.722369 |
| H | -6.738013  | 0.846206  | -2.412241 |
| H | -10.241213 | -3.878666 | -0.203523 |
| H | -11.081016 | -2.416062 | -0.719802 |
| H | -10.883644 | -2.765985 | 1.005238  |
| H | 7.712621   | -3.541070 | 2.057767  |
| H | 7.075261   | -4.222932 | -2.123945 |
| H | 3.988729   | -2.814470 | -2.462300 |
| H | 5.506385   | -3.026649 | -3.345530 |
| H | 5.034196   | -1.430163 | -2.742399 |
| H | 5.935669   | -0.622529 | 2.414225  |
| H | 6.385065   | -2.091831 | 3.291035  |
| H | 4.724659   | -1.858333 | 2.721221  |
| H | 8.787572   | -5.481651 | 0.916790  |
| H | 8.537774   | -5.748230 | -0.816423 |
| H | 9.628941   | -4.477025 | -0.263814 |
| H | 3.185144   | 6.213157  | 1.257673  |
| H | 2.286781   | 4.684570  | 1.276487  |
| H | 3.818294   | 4.819299  | 2.158093  |
| H | 3.186919   | 6.208777  | -1.299458 |
| H | 3.823408   | 4.812665  | -2.194089 |
| H | 2.289942   | 4.679200  | -1.315674 |

*Optimized structure of TS7*

| Atom | x         | y         | z         |
|------|-----------|-----------|-----------|
| C    | -6.826773 | -2.361398 | -0.889234 |
| C    | -6.040639 | -2.023234 | 0.235416  |
| C    | -6.387794 | -2.522237 | 1.511095  |
| C    | -7.509648 | -3.347100 | 1.635592  |
| C    | -8.296740 | -3.697870 | 0.535502  |
| C    | -7.937976 | -3.191641 | -0.716751 |
| C    | -4.861056 | -1.139904 | 0.078306  |
| C    | -3.493835 | -1.541686 | 0.069762  |

|   |           |           |           |
|---|-----------|-----------|-----------|
| C | -2.662251 | -0.380671 | -0.102584 |
| C | -3.547318 | 0.780735  | -0.201522 |
| C | -4.887685 | 0.296456  | -0.090699 |
| C | -2.919832 | -2.828353 | 0.183616  |
| C | -1.545305 | -2.973264 | 0.139278  |
| C | -0.706256 | -1.845764 | -0.023630 |
| C | -1.289569 | -0.548384 | -0.144875 |
| C | 0.730401  | -1.810970 | -0.092211 |
| C | 1.235459  | -0.486384 | -0.265405 |
| S | -0.062586 | 0.712486  | -0.345905 |
| C | 2.596951  | -0.255535 | -0.350048 |
| C | 3.492152  | -1.368477 | -0.262337 |
| C | 3.003239  | -2.676370 | -0.091946 |
| C | 1.635337  | -2.890894 | -0.008463 |
| C | 3.418143  | 0.946792  | -0.513562 |
| C | 4.799407  | 0.508593  | -0.531246 |
| C | 4.848967  | -0.889363 | -0.373726 |
| C | 5.833175  | 1.460225  | -0.717184 |
| C | 5.510865  | 2.791526  | -0.861802 |
| C | 4.161071  | 3.238228  | -0.743064 |
| C | 3.106300  | 2.274911  | -0.651070 |
| C | -5.953473 | 1.197907  | -0.137846 |
| C | -5.691309 | 2.560463  | -0.304519 |
| C | -4.379583 | 3.044261  | -0.420077 |
| C | -3.301772 | 2.136055  | -0.364222 |
| C | 6.073354  | -1.727033 | -0.310954 |
| C | 6.605054  | -2.294510 | -1.488663 |
| C | 7.760903  | -3.076643 | -1.403333 |
| C | 8.404768  | -3.310904 | -0.185343 |
| C | 7.856064  | -2.745558 | 0.969179  |
| C | 6.701579  | -1.957332 | 0.933043  |
| C | 5.942881  | -2.066580 | -2.828918 |
| C | 6.134451  | -1.381612 | 2.210622  |
| C | 9.671943  | -4.130665 | -0.121054 |
| C | -5.583404 | -2.157254 | 2.738581  |
| C | -9.484623 | -4.617561 | 0.690774  |
| C | -6.472005 | -1.856310 | -2.269640 |
| C | 4.094314  | 4.228501  | 1.400199  |
| C | 5.025680  | 5.399998  | 1.193026  |
| C | 2.628787  | 4.544391  | 1.580959  |
| C | 4.611734  | 3.137380  | 2.139196  |
| N | 5.056821  | 2.219079  | 2.710229  |
| H | -1.101187 | -3.959769 | 0.227020  |
| H | -3.562756 | -3.695223 | 0.301470  |
| H | 3.697449  | -3.508247 | -0.024403 |
| H | 1.253405  | -3.898241 | 0.124658  |
| H | 2.075732  | 2.615313  | -0.667981 |
| H | 3.912127  | 4.239118  | -1.080781 |
| H | 6.293795  | 3.522962  | -1.036296 |
| H | 6.865853  | 1.128381  | -0.768890 |
| H | -6.976627 | 0.846240  | -0.043242 |
| H | -6.522084 | 3.256982  | -0.343111 |
| C | -4.071024 | 4.542418  | -0.604266 |
| H | -2.282070 | 2.498621  | -0.447391 |
| H | -8.537524 | -3.451022 | -1.586610 |
| H | -7.778352 | -3.719694 | 2.621659  |
| H | -4.564814 | -2.556931 | 2.690876  |

|   |            |           |           |
|---|------------|-----------|-----------|
| H | -6.055307  | -2.549299 | 3.643262  |
| H | -5.490365  | -1.071534 | 2.847958  |
| H | -7.138892  | -2.282691 | -3.023468 |
| H | -5.443461  | -2.119315 | -2.539007 |
| H | -6.545072  | -0.765471 | -2.334455 |
| H | -9.193595  | -5.667050 | 0.556739  |
| H | -10.259596 | -4.399481 | -0.050123 |
| H | -9.931557  | -4.529836 | 1.685509  |
| H | 8.337222   | -2.923127 | 1.928542  |
| H | 8.167154   | -3.513452 | -2.313102 |
| H | 4.907759   | -2.425132 | -2.833005 |
| H | 6.482777   | -2.586142 | -3.624881 |
| H | 5.907389   | -1.001823 | -3.084058 |
| H | 6.039033   | -0.291664 | 2.171551  |
| H | 6.767799   | -1.634623 | 3.065002  |
| H | 5.130993   | -1.774269 | 2.410919  |
| H | 9.750147   | -4.673354 | 0.825905  |
| H | 9.719245   | -4.859993 | -0.935221 |
| H | 10.561366  | -3.493251 | -0.203210 |
| H | 2.474538   | 5.138621  | 2.493423  |
| H | 2.256910   | 5.142576  | 0.741643  |
| H | 2.022987   | 3.640273  | 1.666542  |
| H | 5.075101   | 6.017532  | 2.101507  |
| H | 6.041847   | 5.076118  | 0.958243  |
| H | 4.663605   | 6.044225  | 0.384658  |
| C | -5.318668  | 5.333291  | -0.641552 |
| C | -3.222046  | 5.079425  | 0.580464  |
| C | -3.329477  | 4.790908  | -1.946325 |
| H | -3.022384  | 6.147527  | 0.455782  |
| H | -3.741631  | 4.929294  | 1.529663  |
| H | -2.265957  | 4.551873  | 0.624097  |
| H | -3.130473  | 5.857710  | -2.082531 |
| H | -2.375284  | 4.258202  | -1.950550 |
| H | -3.925413  | 4.436002  | -2.790346 |
| N | -6.276245  | 5.989102  | -0.675758 |

*Optimized structure of Int4*

| Atom | x         | y         | z         |
|------|-----------|-----------|-----------|
| C    | -6.833136 | -2.331727 | -0.936276 |
| C    | -6.055227 | -2.020907 | 0.201921  |
| C    | -6.415115 | -2.545989 | 1.463678  |
| C    | -7.541136 | -3.368677 | 1.561031  |
| C    | -8.320314 | -3.692471 | 0.447057  |
| C    | -7.949019 | -3.160935 | -0.790944 |
| C    | -4.870337 | -1.140770 | 0.074000  |
| C    | -3.497779 | -1.554076 | 0.072081  |
| C    | -2.660668 | -0.398100 | -0.069992 |
| C    | -3.536865 | 0.770902  | -0.155610 |
| C    | -4.883227 | 0.295097  | -0.068325 |
| C    | -2.936336 | -2.843791 | 0.166827  |
| C    | -1.558816 | -2.996991 | 0.132668  |
| C    | -0.714559 | -1.874897 | -0.000935 |
| C    | -1.285385 | -0.574927 | -0.103224 |
| C    | 0.732186  | -1.845726 | -0.055591 |
| C    | 1.242011  | -0.526245 | -0.199614 |
| S    | -0.047787 | 0.680970  | -0.270054 |
| C    | 2.610688  | -0.303229 | -0.270396 |

|   |            |           |           |
|---|------------|-----------|-----------|
| C | 3.493547   | -1.414771 | -0.196507 |
| C | 3.003424   | -2.718025 | -0.049338 |
| C | 1.628903   | -2.926815 | 0.018651  |
| C | 3.442733   | 0.899087  | -0.391425 |
| C | 4.839725   | 0.432903  | -0.411847 |
| C | 4.877991   | -0.931726 | -0.291258 |
| C | 5.887814   | 1.404831  | -0.592113 |
| C | 5.596668   | 2.718372  | -0.671271 |
| C | 4.200385   | 3.274711  | -0.522267 |
| C | 3.134882   | 2.207229  | -0.463200 |
| C | -5.941749  | 1.207190  | -0.109570 |
| C | -5.667100  | 2.569813  | -0.246907 |
| C | -4.349704  | 3.044936  | -0.338500 |
| C | -3.279649  | 2.127187  | -0.288768 |
| C | 6.085596   | -1.796728 | -0.242407 |
| C | 6.503641   | -2.496928 | -1.394798 |
| C | 7.638367   | -3.310534 | -1.322034 |
| C | 8.371434   | -3.451099 | -0.140596 |
| C | 7.936056   | -2.755001 | 0.990392  |
| C | 6.807508   | -1.929541 | 0.964408  |
| C | 5.751186   | -2.367140 | -2.699888 |
| C | 6.369430   | -1.212892 | 2.222131  |
| C | 9.612725   | -4.310545 | -0.093429 |
| C | -4.027398  | 4.543873  | -0.488149 |
| C | -3.264161  | 4.813557  | -1.813877 |
| C | 4.094794   | 4.282365  | 0.709887  |
| C | 5.098377   | 5.448884  | 0.547159  |
| C | -5.620196  | -2.209407 | 2.705309  |
| C | -9.512994  | -4.610481 | 0.572689  |
| C | -6.464584  | -1.798926 | -2.302611 |
| C | 2.668185   | 4.868897  | 0.829835  |
| C | 4.415574   | 3.553981  | 1.953067  |
| N | 4.669799   | 2.997435  | 2.939922  |
| C | -5.268219  | 5.345121  | -0.528360 |
| N | -6.219897  | 6.009339  | -0.563904 |
| C | -3.192174  | 5.050365  | 0.719628  |
| H | -1.122848  | -3.988419 | 0.206392  |
| H | -3.585262  | -3.708941 | 0.262228  |
| H | 3.691937   | -3.554746 | 0.014984  |
| H | 1.242775   | -3.935126 | 0.133444  |
| H | 2.100141   | 2.534539  | -0.470464 |
| H | 3.986697   | 3.920086  | -1.391543 |
| H | 6.394968   | 3.432490  | -0.845087 |
| H | 6.913385   | 1.059299  | -0.688830 |
| H | -6.968580  | 0.862000  | -0.032479 |
| H | -6.491583  | 3.273989  | -0.280907 |
| H | -2.256331  | 2.483393  | -0.352713 |
| H | -8.542157  | -3.399230 | -1.671169 |
| H | -7.819646  | -3.761188 | 2.536600  |
| H | -4.599972  | -2.604414 | 2.654430  |
| H | -6.096853  | -2.625117 | 3.596829  |
| H | -5.531550  | -1.126401 | 2.842179  |
| H | -7.125107  | -2.208495 | -3.071234 |
| H | -5.434016  | -2.058340 | -2.567761 |
| H | -6.535189  | -0.706875 | -2.345709 |
| H | -9.223787  | -5.658636 | 0.424930  |
| H | -10.278190 | -4.377483 | -0.173784 |

|   |           |           |           |
|---|-----------|-----------|-----------|
| H | -9.971685 | -4.537669 | 1.563288  |
| H | 8.486219  | -2.859664 | 1.922979  |
| H | 7.957132  | -3.847165 | -2.213061 |
| H | 4.712932  | -2.702861 | -2.603857 |
| H | 6.225871  | -2.961219 | -3.485175 |
| H | 5.713951  | -1.325993 | -3.038374 |
| H | 6.412639  | -0.124311 | 2.113116  |
| H | 7.003725  | -1.490746 | 3.067858  |
| H | 5.333901  | -1.457143 | 2.482122  |
| H | 9.759630  | -4.747644 | 0.898835  |
| H | 9.562715  | -5.126982 | -0.820055 |
| H | 10.510591 | -3.723809 | -0.325182 |
| H | 2.639262  | 5.626357  | 1.617471  |
| H | 2.384744  | 5.346882  | -0.113912 |
| H | 1.927969  | 4.105414  | 1.074402  |
| H | 4.975216  | 6.166567  | 1.362466  |
| H | 6.133881  | 5.105762  | 0.558460  |
| H | 4.909681  | 5.968837  | -0.397873 |
| H | -3.055036 | 5.881314  | -1.925276 |
| H | -2.314149 | 4.273425  | -1.814986 |
| H | -3.850183 | 4.480687  | -2.673699 |
| H | -2.982219 | 6.119073  | 0.619377  |
| H | -3.727116 | 4.885757  | 1.657812  |
| H | -2.241139 | 4.514095  | 0.767306  |

*Optimized structure of TS8*

| Atom | x         | y         | z         |
|------|-----------|-----------|-----------|
| C    | -7.031658 | -2.588706 | 1.055565  |
| C    | -6.551361 | -1.912458 | -0.088623 |
| C    | -7.278750 | -1.973434 | -1.298842 |
| C    | -8.465824 | -2.710176 | -1.341123 |
| C    | -8.956893 | -3.388227 | -0.222097 |
| C    | -8.225527 | -3.310427 | 0.966154  |
| C    | -5.293082 | -1.133405 | -0.017702 |
| C    | -3.965610 | -1.660281 | -0.015525 |
| C    | -3.029073 | -0.573614 | 0.065925  |
| C    | -3.801812 | 0.668999  | 0.119339  |
| C    | -5.183182 | 0.305412  | 0.064813  |
| C    | -3.515675 | -2.996344 | -0.095403 |
| C    | -2.158003 | -3.265333 | -0.085849 |
| C    | -1.217283 | -2.213998 | -0.001355 |
| C    | -1.675861 | -0.865591 | 0.073548  |
| C    | 0.221476  | -2.306191 | 0.016018  |
| C    | 0.846284  | -1.027528 | 0.105005  |
| S    | -0.333771 | 0.286208  | 0.168404  |
| C    | 2.227542  | -0.918930 | 0.129795  |
| C    | 3.015730  | -2.106269 | 0.057942  |
| C    | 2.408849  | -3.370655 | -0.021885 |
| C    | 1.023576  | -3.464273 | -0.043674 |
| C    | 3.157924  | 0.211026  | 0.214848  |
| C    | 4.501224  | -0.356537 | 0.183987  |
| C    | 4.422570  | -1.743613 | 0.092722  |
| C    | 5.619410  | 0.524168  | 0.265266  |
| C    | 5.426173  | 1.870238  | 0.365243  |
| C    | 4.090316  | 2.502985  | 0.324187  |
| C    | 2.958504  | 1.549985  | 0.324700  |
| C    | -6.161688 | 1.301221  | 0.112961  |

|   |            |           |           |
|---|------------|-----------|-----------|
| C | -5.771911  | 2.640174  | 0.201651  |
| C | -4.418667  | 3.007221  | 0.249510  |
| C | -3.429531  | 2.001702  | 0.209999  |
| C | 5.557891   | -2.700870 | 0.053998  |
| C | 6.216088   | -3.065350 | 1.249436  |
| C | 7.281950   | -3.968375 | 1.187594  |
| C | 7.714197   | -4.523242 | -0.019953 |
| C | 7.050074   | -4.147498 | -1.190817 |
| C | 5.978750   | -3.249538 | -1.177325 |
| C | 5.782170   | -2.504148 | 2.585007  |
| C | 5.303295   | -2.863811 | -2.474049 |
| C | 8.847404   | -5.521139 | -0.054850 |
| C | -3.970836  | 4.478195  | 0.347759  |
| C | -3.171683  | 4.723989  | 1.656894  |
| C | 3.925620   | 3.749476  | 1.283906  |
| C | 2.502254   | 4.357980  | 1.236392  |
| C | -6.782419  | -1.274513 | -2.544525 |
| C | -10.226779 | -4.201799 | -0.301658 |
| C | -6.292126  | -2.519302 | 2.372866  |
| C | 4.175053   | 3.276006  | 2.663871  |
| N | 4.366215   | 2.922956  | 3.753718  |
| C | 4.945587   | 4.869571  | 0.962994  |
| C | -3.111411  | 4.876183  | -0.883458 |
| C | -5.142234  | 5.378499  | 0.373991  |
| N | -6.039552  | 6.115025  | 0.396909  |
| C | 4.014252   | 3.483623  | -2.362738 |
| C | 3.328721   | 4.728574  | -2.332419 |
| N | 2.754747   | 5.744830  | -2.243973 |
| C | 5.501798   | 3.531479  | -2.638695 |
| C | 3.249876   | 2.316432  | -2.952644 |
| H | -1.808477  | -4.291153 | -0.146812 |
| H | -4.237788  | -3.803761 | -0.167806 |
| H | 3.022637   | -4.264975 | -0.064768 |
| H | 0.549956   | -4.439035 | -0.106776 |
| H | 1.952775   | 1.953695  | 0.358111  |
| H | 4.018215   | 3.034032  | -0.814645 |
| H | 6.290642   | 2.517660  | 0.462277  |
| H | 6.624450   | 0.111715  | 0.274805  |
| H | -7.215350  | 1.039669  | 0.084689  |
| H | -6.534572  | 3.410756  | 0.236100  |
| H | -2.379603  | 2.273480  | 0.252266  |
| H | -9.019948  | -2.756299 | -2.276067 |
| H | -8.596587  | -3.819764 | 1.852819  |
| H | -5.309417  | -2.999245 | 2.313647  |
| H | -6.860121  | -3.015522 | 3.163982  |
| H | -6.118057  | -1.482628 | 2.680159  |
| H | -7.426349  | -1.498200 | -3.398923 |
| H | -5.763147  | -1.585353 | -2.797906 |
| H | -6.757606  | -0.186985 | -2.418058 |
| H | -10.739334 | -4.239388 | 0.664148  |
| H | -10.016144 | -5.237058 | -0.598199 |
| H | -10.921510 | -3.788758 | -1.039019 |
| H | 7.785785   | -4.246609 | 2.110604  |
| H | 7.375558   | -4.560979 | -2.142889 |
| H | 4.243345   | -3.139808 | -2.476769 |
| H | 5.781305   | -3.356431 | -3.324666 |
| H | 5.346942   | -1.781964 | -2.641694 |

|   |           |           |           |
|---|-----------|-----------|-----------|
| H | 5.952666  | -1.424133 | 2.649269  |
| H | 6.331847  | -2.977749 | 3.402380  |
| H | 4.712869  | -2.663348 | 2.758938  |
| H | 8.477129  | -6.545669 | 0.076225  |
| H | 9.380394  | -5.488860 | -1.009733 |
| H | 9.570639  | -5.333864 | 0.744427  |
| H | 2.468344  | 5.247156  | 1.871091  |
| H | 2.252682  | 4.662869  | 0.217114  |
| H | 1.745062  | 3.663734  | 1.605130  |
| H | 4.847839  | 5.674631  | 1.695576  |
| H | 5.978516  | 4.518595  | 0.997007  |
| H | 4.739185  | 5.287692  | -0.024896 |
| H | 5.696382  | 3.550420  | -3.719972 |
| H | 5.972781  | 4.413639  | -2.198763 |
| H | 5.988290  | 2.636544  | -2.234312 |
| H | 3.216528  | 2.389641  | -4.048636 |
| H | 3.741797  | 1.373319  | -2.698021 |
| H | 2.219285  | 2.276608  | -2.591238 |
| H | -2.814428 | 5.926597  | -0.819899 |
| H | -2.206045 | 4.265483  | -0.921900 |
| H | -3.668532 | 4.725915  | -1.811118 |
| H | -2.874327 | 5.773636  | 1.731818  |
| H | -3.771694 | 4.466761  | 2.532873  |
| H | -2.268442 | 4.108915  | 1.664930  |

*Optimized structure of 1*

| Atom | x         | y         | z         |
|------|-----------|-----------|-----------|
| C    | 6.794406  | -2.196738 | 1.169587  |
| C    | 6.053630  | -2.008340 | -0.019074 |
| C    | 6.472110  | -2.633521 | -1.215111 |
| C    | 7.618768  | -3.433180 | -1.197851 |
| C    | 8.361947  | -3.637342 | -0.032226 |
| C    | 7.932571  | -3.007489 | 1.139180  |
| C    | 4.847043  | -1.147237 | -0.012598 |
| C    | 3.498028  | -1.579984 | -0.014474 |
| C    | 2.629757  | -0.427742 | -0.010472 |
| C    | 3.483690  | 0.761256  | -0.010054 |
| C    | 4.836307  | 0.302695  | -0.009058 |
| C    | 2.957041  | -2.890080 | -0.004831 |
| C    | 1.589789  | -3.068182 | -0.001382 |
| C    | 0.714538  | -1.950294 | -0.002103 |
| C    | 1.264337  | -0.627234 | -0.005031 |
| C    | -0.713305 | -1.950559 | 0.003564  |
| C    | -1.263596 | -0.627709 | 0.006715  |
| S    | 0.000138  | 0.611194  | 0.000977  |
| C    | -2.629093 | -0.428731 | 0.011994  |
| C    | -3.496948 | -1.581291 | 0.015673  |
| C    | -2.955464 | -2.891190 | 0.005770  |
| C    | -1.588143 | -3.068770 | 0.002447  |
| C    | -3.483440 | 0.759968  | 0.011263  |
| C    | -4.835886 | 0.300910  | 0.009736  |
| C    | -4.846116 | -1.149014 | 0.013540  |
| C    | -5.879631 | 1.227060  | 0.022189  |
| C    | -5.582318 | 2.593279  | 0.025582  |
| C    | -4.257875 | 3.053980  | 0.022476  |
| C    | -3.202406 | 2.118119  | 0.017568  |
| C    | 5.879700  | 1.229243  | -0.022305 |

|   |            |           |           |
|---|------------|-----------|-----------|
| C | 5.581862   | 2.595351  | -0.025837 |
| C | 4.257249   | 3.055556  | -0.022079 |
| C | 3.202139   | 2.119298  | -0.016465 |
| C | -6.052877  | -2.009871 | 0.019009  |
| C | -6.469843  | -2.639351 | 1.213242  |
| C | -7.613002  | -3.444023 | 1.193071  |
| C | -8.356913  | -3.644952 | 0.027422  |
| C | -7.924717  | -3.016900 | -1.143978 |
| C | -6.790119  | -2.201145 | -1.171466 |
| C | -5.712731  | -2.442170 | 2.507489  |
| C | -6.354133  | -1.561779 | -2.470523 |
| C | -9.606547  | -4.492973 | 0.038570  |
| C | -3.911338  | 4.555246  | 0.028027  |
| C | -3.108433  | 4.930027  | 1.303798  |
| C | 5.717093   | -2.430580 | -2.509684 |
| C | 9.578392   | -4.532400 | -0.032188 |
| C | 6.363147   | -1.553429 | 2.468278  |
| C | -3.103172  | 4.938728  | -1.241779 |
| C | -5.140608  | 5.375132  | 0.027978  |
| N | -6.084099  | 6.051865  | 0.027950  |
| H | 1.172405   | -4.069924 | 0.005890  |
| H | 3.625748   | -3.745333 | 0.003395  |
| H | -3.623816  | -3.746721 | -0.002917 |
| H | -1.170397  | -4.070359 | -0.005097 |
| H | -2.172900  | 2.461918  | 0.020579  |
| H | -6.396311  | 3.310308  | 0.032873  |
| H | -6.912911  | 0.892944  | 0.031923  |
| H | 6.913115   | 0.895550  | -0.032642 |
| H | 6.395589   | 3.312676  | -0.033752 |
| C | 3.910132   | 4.556685  | -0.027775 |
| H | 2.172501   | 2.462706  | -0.019080 |
| H | 8.497181   | -3.151489 | 2.057767  |
| H | 7.942631   | -3.903525 | -2.123691 |
| H | 4.710262   | -2.859465 | -2.464919 |
| H | 6.244120   | -2.899969 | -3.344361 |
| H | 5.596062   | -1.366878 | -2.740406 |
| H | 7.008058   | -1.869385 | 3.292251  |
| H | 5.331962   | -1.820499 | 2.723280  |
| H | 6.400480   | -0.460289 | 2.412316  |
| H | 9.308287   | -5.568011 | 0.209878  |
| H | 10.314267  | -4.208078 | 0.709658  |
| H | 10.066153  | -4.545090 | -1.011357 |
| H | -8.482560  | -3.168701 | -2.065438 |
| H | -7.931868  | -3.923269 | 2.116078  |
| H | -4.706427  | -2.872026 | 2.460255  |
| H | -6.239424  | -2.913594 | 3.341230  |
| H | -5.590263  | -1.379369 | 2.741535  |
| H | -6.390568  | -0.468483 | -2.417036 |
| H | -6.997132  | -1.878835 | -3.295567 |
| H | -5.322492  | -1.830388 | -2.722070 |
| H | -9.766061  | -4.983801 | -0.926200 |
| H | -9.558462  | -5.267277 | 0.809921  |
| H | -10.496140 | -3.884345 | 0.243822  |
| H | -2.877461  | 6.008824  | -1.243457 |
| H | -2.160075  | 4.387010  | -1.265823 |
| H | -3.665492  | 4.698731  | -2.147133 |
| H | -2.882051  | 5.999948  | 1.313499  |



|   |           |          |           |
|---|-----------|----------|-----------|
| H | -3.674816 | 4.684397 | 2.205093  |
| H | -2.165846 | 4.377424 | 1.328200  |
| C | 3.106731  | 4.930926 | -1.303395 |
| C | 3.102162  | 4.940072 | 1.242183  |
| C | 5.139071  | 5.377065 | -0.028204 |
| H | 2.879906  | 6.000752 | -1.313213 |
| H | 3.672978  | 4.685379 | -2.204798 |
| H | 2.164368  | 4.377923 | -1.327452 |
| H | 2.876056  | 6.010085 | 1.243740  |
| H | 2.159271  | 4.388015 | 1.266577  |
| H | 3.664815  | 4.700438 | 2.147425  |
| N | 6.082259  | 6.054220 | -0.028644 |

## 5. References

1. S. Mori, M. Akita, S. Suzuki, M. S. Asano, M. Murata, T. Akiyama, T. Matsumoto, C. Kitamura, S.-i. Kato, *Chem. Commun.* **2020**, *56*, 5881.
2. S. Mori, S. Moles Quintero, N. Tabaka, R. Kishi, R. González Núñez, A. Harbuzaru, R. Ponce Ortiz, J. Marín-Beloqui, S. Suzuki, C. Kitamura, C. J. Gómez-García, Y. Dai, F. Negri, M. Nakano, S.-i. Kato, J. Casado, *Angew. Chem. Int. Ed.* **2022**, *61*, e202206680.
3. X. Fu, D. Zhao, *Org. Lett.* **2015**, *17*, 5694.
4. *CrysAlisPro*; Rigaku OD, The Woodlands, TX, 2015.
5. O. V. Dolomanov, L. J. Bourhis, R. J. Gildea, J. A. K. Howard, H. Puschmann, *J. Appl. Cryst.* **2009**, *42*, 339.
6. G. M. Sheldrick, *Acta Crystallogr., Sect. A* **2015**, *71*, 3.
7. G. M. Sheldrick, *Acta Crystallogr., Sect. C* **2015**, *71*, 3.
8. Yamaguchi, K. *Chem. Phys. Lett.* **1975**, *33*, 330.
9. A. D. Becke, *J. Chem. Phys.* **1993**, *98*, 5648.
10. C. Lee, W. Yang, R. G. Parr, *Phys. Rev. B* **1998**, *57*, 785.
11. R. Ditchfield, W. J. Hehre, J. A. Pople, *J. Chem. Phys.* **1971**, *54*, 724.
12. *Gaussian 16*, Revision C.01, M. J. Frisch, G. W. Trucks, H. B. Schlegel, G. E. Scuseria, M. A. Robb, J. R. Cheeseman, G. Scalmani, V. Barone, G. A. Petersson, H. Nakatsuji, X. Li, M. Caricato, A. V. Marenich, J. Bloino, B. G. Janesko, R. Gomperts, B. Mennucci, H. P. Hratchian, J. V. Ortiz, A. F. Izmaylov, J. L. Sonnenberg, D. Williams-Young, F. Ding, F. Lipparini, F. Egidi, J. Goings, B. Peng, A. Petrone, T. Henderson, D. Ranasinghe, V. G. Zakrzewski, J. Gao, N. Rega, G. Zheng, W. Liang, M. Hada, M. Ehara, K. Toyota, R. Fukuda, J. Hasegawa, M. Ishida, T. Nakajima, Y. Honda, O. Kitao, H. Nakai, T. Vreven, K. Throssell, J. A. Montgomery, Jr., J. E. Peralta, F. Ogliaro, M. J. Bearpark, J. J. Heyd, E. N. Brothers, K. N. Kudin, V. N. Staroverov, T. A. Keith, R. Kobayashi, J. Normand, K. Raghavachari, A. P. Rendell, J. C. Burant, S. S. Iyengar, J. Tomasi, M. Cossi, J. M. Millam, M. Klene, C. Adamo, R. Cammi, J. W. Ochterski, R. L. Martin, K. Morokuma, O. Farkas, J. B. Foresman, and D. J. Fox, Gaussian, Inc., Wallingford CT, 2016.
